# Supplementary material for: Awareness of alcohol marketing, ownership of alcohol branded merchandise, and the association with alcohol consumption, higher-risk drinking, and drinking susceptibility in adolescents and young adults: a cross-sectional survey in the UK
Source: PubMed Central journal article supplement (PMC6530316; doi:10.1136/bmjopen-2018-025297), 2019-03-14
Supplement: bmjopen-2018-025297.draft_revisions.pdf [file bmjopen-2018-025297.draft_revisions.pdf]

# BMJ Open

BMJ Open is committed to open peer review. As part of this commitment we make the peer review history of every article we publish publicly available.

When an article is published we post the peer reviewers' comments and the authors' responses online. We also post the versions of the paper that were used during peer review. These are the versions that the peer review comments apply to.

The versions of the paper that follow are the versions that were submitted during the peer review process. They are not the versions of record or the final published versions. They should not be cited or distributed as the published version of this manuscript.

BMJ Open is an open access journal and the full, final, typeset and author-corrected version of record of the manuscript is available on our site with no access controls, subscription charges or pay-per-view fees (<http://bmjopen.bmj.com>).

If you have any questions on BMJ Open's open peer review process please email [info.bmjopen@bmj.com](mailto:info.bmjopen@bmj.com)

# BMJ Open

**Awareness of alcohol marketing, ownership of alcohol branded merchandise, and the association with alcohol consumption, higher-risk drinking, and drinking susceptibility in adolescents and young adults: A cross-sectional survey in the United Kingdom.**

|                               |                                                                                                                                                                                                                                                                                                                                                                               |
|-------------------------------|-------------------------------------------------------------------------------------------------------------------------------------------------------------------------------------------------------------------------------------------------------------------------------------------------------------------------------------------------------------------------------|
| Journal:                      | <i>BMJ Open</i>                                                                                                                                                                                                                                                                                                                                                               |
| Manuscript ID                 | bmjopen-2018-025297                                                                                                                                                                                                                                                                                                                                                           |
| Article Type:                 | Research                                                                                                                                                                                                                                                                                                                                                                      |
| Date Submitted by the Author: | 08-Jul-2018                                                                                                                                                                                                                                                                                                                                                                   |
| Complete List of Authors:     | Critchlow, Nathan; University of Stirling, Institute for Social Marketing<br>Mackintosh, Anne Marie; University of Stirling Institute for Social Marketing<br>Thomas, Christopher; Cancer Research UK, Cancer Policy Research Centre<br>Hooper, Lucie; Cancer Research UK, Cancer Policy Research Centre<br>Vohra, Jyotsna; Cancer Research UK, Cancer Policy Research Centre |
| Keywords:                     | PUBLIC HEALTH, Health policy < HEALTH SERVICES ADMINISTRATION & MANAGEMENT, Child protection < PAEDIATRICS, SOCIAL MEDICINE                                                                                                                                                                                                                                                   |
|                               |                                                                                                                                                                                                                                                                                                                                                                               |

SCHOLARONE™  
Manuscripts

**Running head:** Alcohol marketing and consumption in young people in the UK

**Title:** Awareness of alcohol marketing, ownership of alcohol branded merchandise, and the association with alcohol consumption, higher-risk drinking, and drinking susceptibility in adolescents and young adults: A cross-sectional survey in the United Kingdom.

**Running head:** Alcohol marketing and consumption in young people in the UK

**Authors**

Nathan Critchlow<sup>1</sup>

Anne Marie MacKintosh<sup>1</sup>

Christopher Thomas<sup>2</sup>

Lucie Hooper<sup>2</sup>

Jyotsna Vohra<sup>2</sup>

<sup>1</sup> Institute for Social Marketing, Faculty of Health Sciences and Sport, University of Stirling, Stirling.

<sup>2</sup> Cancer Policy Research Centre, Cancer Research UK, London.

**Corresponding author**

Nathan Critchlow, Institute for Social Marketing, Faculty of Health Sciences and Sport, University of Stirling, Stirling, FK9 4LA. E-mail: [nathan.critchlow@stir.ac.uk](mailto:nathan.critchlow@stir.ac.uk); Tel: +44(0)1786467382.

**Word Count:** 3,910

**Table and figure count:** 5 (All tables)

**Running head:** Alcohol marketing and consumption in young people in the UK

**Awareness of alcohol marketing, ownership of alcohol branded merchandise, and the association with alcohol consumption, higher-risk drinking, and drinking susceptibility in adolescents and young adults: A cross-sectional survey in the United Kingdom.**

## ABSTRACT

**Objectives:** To explore awareness of alcohol marketing in adolescents and young adults in the United Kingdom (UK), what factors are associated with awareness, and what association awareness has with alcohol consumption, higher-risk drinking, and drinking susceptibility?

**Design:** Online cross-sectional survey conducted April–May 2017.

**Setting:** UK.

**Participants:** Adolescents and young adults aged 11–19 years old in the UK ( $n=3,399$ ) (average age: 15.18).

**Main outcome measures:** Score on Alcohol Use Disorders Identification Test–Consumption (AUDIT-C) (0–12) and indication of higher-risk consumption ( $\geq 5$  AUDIT-C) in current drinkers. Susceptibility to drink alcohol in the next year (Yes/No) in never drinkers.

**Results:** Eighty-two percent of respondents were aware of at least one form of alcohol marketing in the past month and 17% owned alcohol branded merchandise. Chi-square tests found that higher awareness of alcohol marketing was associated with being a current drinker ( $p<0.001$ ), a higher-risk drinker ( $p<0.001$ ), frequency of parental consumption ( $p<0.001$ ), and perceived parental ( $p<0.001$ ) and peer approval of consumption ( $p<0.001$ ). Among current drinkers, hierarchical regressions (controlling for demographics and interpersonal correlates of consumption) found that marketing awareness and owning branded merchandise was positively associated with AUDIT-C score and higher-risk consumption. For example, current drinkers reporting medium marketing awareness were twice as likely to be higher-risk drinkers as those reporting low awareness (AOR=2.18, 95% CI: 1.39–3.42,  $p<0.001$ ). Among never drinkers, respondents who owned branded merchandise were twice as likely to be susceptible to drinking as those who did not (AOR=1.98, 95% CI: 1.20–3.24,  $p=0.007$ ).

**Conclusions:** Young people, above and below the legal purchasing age for alcohol in the UK, are aware of alcohol marketing through a range of channels and almost one-in-five own branded merchandise. Marketing awareness in current drinkers was independently associated with increased alcohol consumption and greater likelihood of higher-risk consumption. In never drinkers, ownership of branded merchandise was associated with greater susceptibility.

**Running head:** Alcohol marketing and consumption in young people in the UK

1  
2  
3  
4  
5  
6  
7  
8  
9  
10  
11  
12  
13  
14  
15  
16  
17  
18  
19  
20  
21  
22  
23  
24  
25  
26  
27  
28  
29  
30  
31  
32  
33  
34  
35  
36  
37  
38  
39  
40  
41  
42  
43  
44  
45  
46  
47  
48  
49  
50  
51  
52  
53  
54  
55  
56  
57  
58  
59  
60

1 **Keywords:** Alcohol marketing; Young people; Higher-risk drinking; Alcohol Advertising;  
2 Susceptibility; Survey; Public Health; Health Policy.

3  
4 **Strengths and limitations of this study**

- 5 • This is the first study in the UK to examine alcohol marketing awareness and  
6 ownership of alcohol branded merchandise in a demographically representative  
7 sample of young people across the UK (England, Scotland, Wales, and Northern  
8 Ireland), including those above and below the legal purchasing age for alcohol.
- 9 • The study provides timely insight into what forms of alcohol marketing young people  
10 are aware of in the current media landscape, how frequently they recall seeing alcohol  
11 marketing through these channels, and what factors are associated with higher  
12 awareness of alcohol marketing.
- 13 • The large sample size supports robust statistical analysis to examine what relationship  
14 (if any) there is between alcohol marketing awareness and consumption, controlling  
15 for other demographic and interpersonal correlates of alcohol consumption.
- 16 • The study explores the association between alcohol marketing and consumption at  
17 three levels: overall alcohol consumption, higher-risk consumption, and susceptibility  
18 in never-drinkers.
- 19 • The cross-sectional nature of the survey does not enable causal relationships to be  
20 drawn about the link between alcohol marketing and either alcohol consumption or  
21 susceptibility to drink.

**Running head:** Alcohol marketing and consumption in young people in the UK

**Awareness of alcohol marketing, ownership of alcohol branded merchandise, and the association with alcohol consumption, higher-risk drinking, and drinking susceptibility in adolescents and young adults: A cross-sectional survey in the United Kingdom.**

**INTRODUCTION**

Adolescents and young adults (young people) are a focal population for alcohol research because consumption at this stage of development is associated with increased consumption and risk of concomitant harms in later adulthood [1,2]. Global estimates indicate that consumption by young people is particularly high in Europe, where the proportion of current drinkers (69.5%) is higher than the five other global regions, and the proportion of lifetime abstainers is lower (15.9%) [3]. In England, it is estimated that approximately half of 11-15-year olds (44%) have consumed an alcoholic drink, one-in-ten have consumed in the past week, and nine percent have been drunk in the past month [4]. Similar estimates are reported in Scotland and Wales [5,6]. Understanding the drivers of alcohol consumption in young people is important given the immediate and long-term individual, social, and economic consequences associated with higher-risk drinking [7].

One factor routinely cited as shaping alcohol-related attitudes and behaviours in young people is marketing [8,9]. Marketing is fundamentally important to alcohol producers. It represents the primary method of communicating with new and existing consumers, can directly encourage sales, and can increase brand salience over competitors. Accordingly, alcohol companies have used highly visible marketing for over 100 years [10], with the current UK landscape characterised by a complex network of mass media marketing (e.g. television), alternative marketing (e.g. sponsorship), consumer marketing (e.g. price), and stakeholder marketing (e.g. retailers) [9]. The importance of marketing to the alcohol industry is evidenced through their annual investment, with Diageo's global marketing expenditure approximately £1.8 billion [11]. Continued consolidation in the alcohol industry has also seen

**Running head:** Alcohol marketing and consumption in young people in the UK

1  
2  
3 1 the market become dominated by a small number of transnational producers, creating larger  
4  
5 2 marketing budgets, economies of scale, and intense competition [12].  
6

7 3 Content analysis research, which focuses on marketing output as the unit of analysis,  
8  
9 4 consistently reports that marketing may reach and influence young people. For example,  
10  
11 5 marketing has been reported in media environments where young people may be exposed,  
12  
13 6 including sports [13], social media [14], print media [15], and on-screen [16, 17]. Content  
14  
15 7 research has also found that marketing may appeal to young people through creative designs,  
16  
17 8 topical and real-world associations, and positive connotations around consumption such as  
18  
19 9 sociability or desirable lifestyles [18,19]. It has also been suggested that commercial  
20  
21 10 marketing contains ambiguous messages about lower-risk consumption [20,21].  
22  
23

24 11 Systematic reviews of consumer research, which focus on the individual as the unit of  
25  
26 12 analysis, provide consistent evidence that awareness of, and participation with, marketing has  
27  
28 13 a causal influence on consumption, including initiation and frequency of drinking [22,23].  
29  
30 14 Message interpretation research has also attempted to move the debate on from whether  
31  
32 15 marketing is associated with consumption and onto how this influence occurs, by identifying  
33  
34 16 psychological mechanisms which mediate the relationship between exposure and  
35  
36 17 consumption [24,25].  
37  
38

39 18 In the UK, the influence of alcohol marketing on young people, and the appropriate  
40  
41 19 regulatory response, has been a topic of debate for decades [9,26]. There are, however,  
42  
43 20 unresolved issues which have inhibited attempts to move the debate forward. The last large-  
44  
45 21 scale assessment of young people's awareness of alcohol marketing in the UK is a decade  
46  
47 22 old, was only conducted in Scotland, only sampled adolescents under the minimum purchase  
48  
49 23 age, only considered overall marketing awareness (not frequency), and did not consider  
50  
51 24 higher-risk consumption [27,28]. In this study, we explore frequency of awareness for  
52  
53 25 alcohol marketing and ownership of alcohol branded merchandise in young people above and  
54  
55  
56  
57  
58  
59  
60

**Running head:** Alcohol marketing and consumption in young people in the UK

1 below the legal purchasing age, and consider what association (if any) this has with alcohol  
2 consumption, likelihood of higher-risk drinking, and susceptibility to drink in the next year,  
3 in a demographically representative sample in the UK.

**METHOD****Design and sample**

4  
5  
6  
7  
8  
9  
10  
11  
12  
13  
14  
15  
16  
17  
18  
19  
20  
21  
22  
23  
24  
25  
26  
27  
28  
29  
30  
31  
32  
33  
34  
35  
36  
37  
38  
39  
40  
41  
42  
43  
44  
45  
46  
47  
48  
49  
50  
51  
52  
53  
54  
55  
56  
57  
58  
59  
60  
Data come from the 2017 Youth Alcohol Policy Survey, an online cross-sectional survey  
conducted with 11-19-year olds in the UK ( $n=3,399$ ). Responses were collected April–May  
2017. The survey was hosted by YouGov, a market research company, who recruited a  
representative sample from their UK panel [29]. The study design was informed by previous  
cross-sectional surveys in the UK exploring young people’s experiences of alcohol and  
tobacco marketing [27,30].

**Measures****Demography**

Age, gender, ethnicity, resident country (England, Scotland, Wales, Northern Ireland), living  
status, employment status, educational status, legal purchasing status, and indices of  
deprivation (IMD), were obtained from information held about panel respondents or survey  
questions.

**Awareness of alcohol marketing**

Awareness of alcohol marketing was assessed through structured, self-reported recall, a  
method frequently used in consumer research [31]. Participants were prompted with the  
statement ‘*Over the last month, how often, if at all, have you seen...*’ and then presented with  
descriptions of marketing in nine channels: (1) newspapers or magazines; (2) television; (3)



**Running head:** Alcohol marketing and consumption in young people in the UK

1  
2  
3 1 billboards; (4) radio; (5) adverts on social media (e.g. YouTube, Tumblr, Facebook,  
4  
5 2 SnapChat, Instagram or other social media); (6) famous people in films, music videos or TV  
6  
7 3 or pictured in magazines; (7) sports, games, or events sponsorship; (8) special price offers;  
8  
9 4 and (9) competitions or prize draws. For each channel, a six-point Likert scale was used to  
10  
11 5 measure frequency of noticing marketing in the past month (1=Everyday – 6=Not in the past  
12  
13 6 month; Not sure).

14  
15  
16 7 For each channel, the self-reported frequency of awareness was converted into the  
17  
18 8 estimated number of days that marketing had been seen in a four-week period (i.e. ‘one  
19  
20 9 month’). For example, an answer of ‘everyday’ for television advertising equated to 28  
21  
22 10 instances of awareness over four weeks (i.e. seven days a week multiplied by four). Scores  
23  
24 11 across the nine channels were summed to create an aggregate score, providing an  
25  
26 12 approximation of the number of times that participants had noticed alcohol marketing in the  
27  
28 13 past month. This aggregate score could only be computed for cases where a valid answer had  
29  
30 14 been given for all nine channels. If a participant answered ‘not sure’ to any of the nine  
31  
32 15 channels they were coded as ‘not stated’ for the aggregate score. The aggregate score for the  
33  
34 16 valid sample was split into tertiles of low (aggregate score  $\leq 16$ ), medium (17-53) and high  
35  
36 17 awareness ( $\geq 54$ ).

**Ownership of alcohol brand merchandise**

37  
38  
39 18  
40  
41  
42 19  
43 20 Participants were asked ‘*Do you own any merchandise (such as clothing or drinks glasses)*  
44  
45 21 *that show an alcoholic drink brand or logo?*’ (Yes/No/Not sure).  
46  
47  
48 22

**Drinking status**

49  
50 23  
51 24 Participants were asked ‘*Have you ever had a whole alcoholic drink? Not just a sip.*’ Those  
52  
53 25 who answered ‘No’ were classed as never-drinkers while those who answered ‘Yes’ were  
54  
55  
56  
57  
58  
59  
60

**Running head:** Alcohol marketing and consumption in young people in the UK

1 classed as ever-drinkers. Ever-drinkers were also asked '*How often do you usually have a*  
2 *drink containing alcohol?*' with response options of 'Never', 'Monthly or less often', '2-4  
3 times a month', '2-3 times a week', and '4 or more times a week'. Those who answered other  
4 than 'Never' were classed as current-drinkers.

**Alcohol consumption and higher-risk drinking**

7 Alcohol use was measured through the Alcohol Use Disorders Identification Test–  
8 Consumption (AUDIT-C), which assessed frequency of consumption, units drunk in a typical  
9 occasion, and frequency of high episodic drinking. Responses were provided on five-point  
10 scales with the answers for each item relative to frequency (0=Never – 4= Four or more times  
11 a week), units drunk (0=1-2 units – 4=10 units or more), and frequency of high episodic  
12 drinking (0=Never – 4=Daily or almost Daily). High episodic drinking was classified as eight  
13 or more units in a single occasion for males, and six or more units for females (one unit=8g  
14 or 10ml of alcohol). A diagram depicting the unit content of alcoholic drinks was included to  
15 assist calculation of units. A total AUDIT-C score was computed (0-12), with a cut-off of  $\geq 5$   
16 used to identify higher-risk consumption [32].

**Susceptibility**

19 As per tobacco research, susceptibility was defined as the absence of a firm decision not to  
20 drink alcohol in the next year [30]. Never-drinkers were classified as 'non-susceptible' if they  
21 answered 'definitely no' to the question '*Do you think you will drink alcohol at any time*  
22 *during the next year?*' Those who answered anything other than 'Definitely no' were  
23 classified as 'Susceptible'.

**Confounding variables**

**Running head:** Alcohol marketing and consumption in young people in the UK

1  
2  
3 1 Confounding factors were included to contextualise the association (if any) between  
4  
5 2 marketing and consumption. Frequency of consumption was measured for the mother (female  
6  
7 3 carer), father (male carer), and closest friend (each scored: 1=Never – 9=Every day or almost  
8  
9 4 every day; Prefer not to say; Not applicable). For each group, self-reported consumption was  
10  
11 5 also converted into the estimated number of days alcohol was consumed on each year (e.g.  
12  
13 6 every day or almost every day equated to 312 days per year). Perceived acceptability of  
14  
15 7 consumption was measured for parents and peers (each scored: 1=Total acceptable –  
16  
17 8 5=Totally unacceptable). For both groups, acceptability was converted into dichotomous  
18  
19 9 categories ('Neutral or unacceptable' and 'Acceptable'). For ever drinkers, age of first drink  
20  
21 10 was also measured ( $\leq 8$  years old – 19 years old; Can't remember; Prefer not to say). Answers  
22  
23 11 were converted into three categories ( $\leq 13$  years; 14-15 years;  $\geq 16$  years).  
24  
25  
26  
27  
28

**Ethics**

29  
30  
31 14 Ethical approval was obtained from the University of Stirling's General University Ethics  
32  
33 15 Panel (GUEP59). YouGov included a lead for ethical and quality assurance, including  
34  
35 16 consent, post-survey debriefing and signposting to support organisations, and confidentiality  
36  
37 17 and anonymity.  
38  
39  
40  
41

**Analysis**

42  
43  
44 20 Data were analysed using SPSS version 23. Descriptive data were weighted so percentages  
45  
46 21 and median scores were representative of the demographic profile of young people in the UK.  
47  
48 22 Bivariate analyses, using Chi-square tests, were conducted to examine the relationship  
49  
50 23 between alcohol marketing awareness and demographic and confounding variables.  
51

52  
53 24 Multivariate analyses were conducted on unweighted data, as demographic and  
54  
55 25 confounding variables were controlled for in the regressions. A hierarchical linear regression  
56  
57  
58  
59  
60

**Running head:** Alcohol marketing and consumption in young people in the UK

1 was conducted with current drinkers' AUDIT-C score as the dependent variable and  
2 awareness of marketing and ownership of branded merchandise as key independent variables.  
3 The following demographic and confounding variables were also included in initial blocks:  
4 age; gender; ethnicity; IMD quintile; resident country; educational status; working status;  
5 living status; frequency of mother (female carer), father (male carer) and close friend  
6 drinking; perceived parental and peer acceptability of consumption; and drink age of first  
7 drink. Categorical variables with  $\geq 3$  categories were converted into dummy (binary) variables  
8 to aid interpretation and comparison. The omitted dummy variable formed the reference  
9 category. For example, marketing awareness was a categorical variable with four levels: low,  
10 medium, high, and not stated. Four binary variables were computed: low awareness, medium  
11 awareness, high awareness, and not stated (each coded Yes=1, No=0). By including medium,  
12 high and not stated in the regression analysis, and omitting low awareness, the reference  
13 category was low awareness. The regressions therefore indicate the association between level  
14 of consumption and medium awareness, relative to low awareness, and high awareness  
15 relative to low awareness. Reference categories for each variable are displayed in results  
16 (Table 3).

17 Two hierarchical logistic regressions were conducted with higher-risk drinking  
18 (AUDIT-C  $\geq 5$ ) among current drinkers and susceptibility to drink among never-drinkers as  
19 the dependent variables. Marketing awareness and ownership of branded merchandise were  
20 the key independent variables. Where applicable, both logistic regressions controlled for the  
21 same demographic and confounding variables as the linear regression. Reference categories  
22 for categorical independent variables are indicated in the results (Tables 4 and 5). Where the  
23 categorical variables had three  $\geq 3$  levels, and were of an ordinal level, the SPSS  
24 contrast=difference function enabled comparison of each increasing category relative to the  
25 combined previous categories. For example, the first comparison with frequency of mother's

**Running head:** Alcohol marketing and consumption in young people in the UK

1 drinking and higher-risk drinking was 'less than monthly drinking' vs. 'mother never drinks',  
2 whereas the final comparison was 'at least weekly drinking' vs. 'less often'. As the  
3 independent variables were categorical, 'not stated' responses were also included as a  
4 separate category and compared against the reference category for each variable. This  
5 enabled the maximum sample to be retained. For example, the large number of 'not stated'  
6 responses on level of marketing awareness could be compared with those for whom  
7 marketing awareness could be computed.

**RESULTS****Sample characteristics**

11 The weighted sample ( $n=3,399$ ) had an average age of 15.18 years old ( $SD=2.55$ ; range: 11-  
12 19), with three quarters (76%) below the legal purchasing age ( $\leq 18$  years). There was an even  
13 distribution for gender (51% female and 49% male). The majority of the sample were White  
14 British (76%) and were evenly distributed across IMD (20% in each quintile). Most  
15 participants lived in England (84%) with the remainder from Scotland (8%), Wales (5%), and  
16 Northern Ireland (3%). Almost all participants were living at home with parent(s) or other  
17 adult family members (90%) and were in some form of education (95%).

**Awareness of alcohol marketing**

20 The most frequent sources of marketing awareness in the past month were adverts on  
21 television (Median 6 instances per month, Inter quartile range=14), celebrity endorsement  
22 (Median 6, IQR=14), and special offers (Median 6, IQR=14) (Table 1). More than a third of  
23 participants (%) had noticed marketing through these channels at least weekly. Billboard  
24 adverts (Median 2 instances per month, IQR=6) and social media adverts (Median 2, IQR =  
25 6) were noticed less than once a week, with at least a quarter of participants (%) having

**Running head:** Alcohol marketing and consumption in young people in the UK

1 noticed such adverts at least weekly. Lowest awareness was for adverts in the print press  
2 (Median 0 instances per month, IQR=6), on radio (Median 0, IQR = 0) and competitions  
3 (Median 0, IQR=2). For each of the channels, a fifth or more (range: 19-29%) were not sure  
4 how often, if at all, they had come across alcohol marketing. Overall, 82% had noticed  
5 marketing through least one channel.

6  
7 [TABLE 1]

**Aggregate alcohol marketing awareness**

8  
9  
10 The median aggregate alcohol marketing score was 32 (IQR=60), equating to noticing 32  
11 instances of alcohol marketing in the past month (under minimum purchase age: median=28;  
12 IQR=60). When categorised into tertiles, 35% of the valid sample were classified as having  
13 low awareness ( $\leq 16$  instances per month), 32% had medium awareness (17–53), and 34%  
14 had high awareness ( $\geq 54$ ). In those under the minimum purchase age, 38% had low  
15 awareness, 31% medium, and 32% high. Bivariate Chi-square tests found that higher  
16 awareness was significantly associated with being male, of legal purchasing age, a current  
17 drinker, a higher-risk drinker, not in education, in employment, and perceiving parents and  
18 peers would consider it okay to consume (Table 2). High awareness was also associated with  
19 greater frequency of mother (female carer) consumption,  $\chi^2(16)=38.25$ ,  $p<0.001$ , and greater  
20 frequency of father (male carer) consumption,  $\chi^2(16)=198.51$ ,  $p<0.001$ . There was no  
21 difference in awareness by ethnicity, IMD quintile, or resident country.

22  
23 [TABLE 2]

**Owning alcohol branded merchandise**

**Running head:** Alcohol marketing and consumption in young people in the UK

1  
2  
3 1 Almost a fifth of participants (17%) reported owning branded merchandise.  
4  
5 2

**Association between alcohol marketing and AUDIT-C scoring**

6  
7 3  
8  
9 4 Almost half of the sample (48%;  $n=1,592$ ) were current drinkers. Within current drinkers, the  
10  
11 5 average AUDIT-C score was 4.30 ( $SD=2.76$ ). A hierarchical linear regression, controlling for  
12  
13 6 demographic and confounding variables, was conducted to examine the association between  
14  
15 7 marketing awareness, ownership of branded merchandise, and AUDIT-C scoring.

16  
17  
18 8 In the final stage of the model, of the demographic variables, being older ( $b=0.43$ ,  
19  
20 9 95% CI: 0.35-0.51,  $p<0.001$ ), male ( $b=0.31$ , 95% CI: 0.09-0.54,  $p=0.006$ ), from a more  
21  
22 10 affluent IMD ( $b=0.11$ , 95% CI: 0.03-0.20,  $p=0.007$ ), in education ( $b=0.66$ , 95% CI: 0.55-  
23  
24 11 1.10,  $p=0.003$ ), and living independently of parents or adult family members ( $b=0.87$ , 95%  
25  
26 12 CI: 0.54-1.20,  $p<0.001$ ) was associated with higher AUDIT-C score (Table 3). Of the  
27  
28 13 confounding variables, having a close friend who drinks at least weekly ( $b=1.44$ , 95% CI:  
29  
30 14 1.19-1.69,  $p<0.001$ ), and perceiving that parents consider it acceptable to consume ( $b=0.29$ ,  
31  
32 15 95% CI: 0.01-0.57,  $p=0.39$ ) was associated with higher AUDIT-C score. Having a first  
33  
34 16 alcoholic drink at 16 years old or over ( $b= -1.33$ , 95% CI: -1.63 – -1.04,  $p<0.001$ ) was  
35  
36 17 associated with lower AUDIT-C score, compared with those who first drank aged 14–15  
37  
38 18 years. Of the marketing variables, medium awareness ( $b=0.79$ , 95% CI: 0.37-1.21,  $p<0.001$ ),  
39  
40 19 or high awareness ( $b=0.85$ , 95% CI: 0.44-1.26,  $p<0.001$ ), compared to low awareness, was  
41  
42 20 associated with higher AUDIT-C score, as was ownership of branded merchandise ( $b=0.79$ ,  
43  
44 21 95% CI: 0.55-1.04,  $p<0.001$ ).  
45  
46  
47  
48  
49

50 23 [TABLE 3]  
51  
52  
53 24

**Association between alcohol marketing and higher-risk consumption**

**Running head:** Alcohol marketing and consumption in young people in the UK

1  
2  
3 1 Almost half of current drinkers (44%;  $n=699$ ) were classified as higher-risk ( $\geq 5$  AUDIT-C).  
4  
5 2 A hierarchical logistic regression, controlling for demographic and confounding variables,  
6  
7 3 was conducted to examine the association between marketing awareness, ownership of  
8  
9 4 branded merchandise, and higher-risk drinking.

10  
11 5 In the final stage of the model, of the demographic variables, being older (Adjusted  
12  
13 6 Odds Ratio=1.40, 95% CI: 1.28-1.53,  $p<0.001$ ), male (AOR=1.32, 95% CI: 1.04-1.68,  
14  
15 7  $p=0.022$ ), from England compared to Wales (AOR=0.58, 95% CI: 0.36-0.93,  $p=0.024$ ), in  
16  
17 8 education (AOR=1.61, 95% CI: 1.01-2.55,  $p=0.045$ ), and living independently (AOR=1.56,  
18  
19 9 95% CI: 1.09-2.23,  $p=0.015$ ) was associated with higher-risk drinking (Table 4). Of the  
20  
21 10 confounding variables, increasing frequency of close friend consumption ( $p<0.001$ ), and  
22  
23 11 having had first drink aged 14-15 years old or younger (AOR=0.26, 95% CI: 0.19-0.35,  
24  
25 12  $p<0.001$ ) was associated with higher-risk consumption. Of the marketing variables, medium  
26  
27 13 awareness (AOR=2.18, 95% CI: 1.39-3.42,  $p<0.001$ ), high awareness (AOR=1.43, 95% CI:  
28  
29 14 1.01-2.02,  $p=0.045$ ), and owning branded merchandise were associated with higher-risk  
30  
31 15 drinking (AOR=1.81, 95% CI: 1.31-2.22,  $p<0.001$ ).  
32  
33  
34  
35  
36  
37  
38  
39  
40  
41

42 [TABLE 4]  
43  
44  
45  
46  
47  
48  
49  
50  
51  
52  
53  
54  
55  
56  
57  
58  
59  
60

**Association between alcohol marketing and susceptibility to consume**

20 Half of participants (52%) were classified as 'never drinkers'. Within never drinkers, half  
45 (52%;  $n=830$ ) were susceptible to consumption (i.e. did not definitively reject that they would  
46  
47 21 consume in the next year). A hierarchical logistic regression, controlling for demographic and  
48  
49 22 confounding variables, was conducted to examine the association between marketing  
50  
51 23 awareness, ownership of branded merchandise, and susceptibility.  
52  
53 24



**Running head:** Alcohol marketing and consumption in young people in the UK

1  
2  
3 1 In the final stage of the model, of the demographic variables, only being white British  
4  
5 2 (AOR=1.51, 95% CI: 1.12-2.03,  $p=0.07$ ) was associated with susceptibility (Table 5). Of the  
6  
7 3 confounding variables, frequency of mother (female carer) consumption ( $p<0.001$ ), frequency  
8  
9 4 of father (male carer) consumption ( $p=0.023$ ), frequency of close friend consumption  
10  
11 5 ( $p<0.001$ ), and perceived peer approval (AOR=2.29, 95% CI: 1.77-2.96,  $p<0.001$ ) were  
12  
13 6 associated with susceptibility. Of the marketing variables, awareness of alcohol marketing  
14  
15 7 was not significantly associated with susceptibility, but ownership of branded merchandise  
16  
17 8 was (AOR=1.98, 95% CI: 1.20-3.24,  $p=0.007$ ), with those who owned branded merchandise  
18  
19 9 being more likely to be susceptible.  
20  
21  
22  
23  
24  
25  
26  
27  
28

29  
30  
31  
32  
33  
34  
35  
36  
37  
38  
39  
40  
41  
42  
43  
44  
45  
46  
47  
48  
49  
50  
51  
52  
53  
54  
55  
56  
57  
58  
59  
60

10  
11 [TABLE 5]  
12

**DISCUSSION**

14 The findings indicate that young people are aware of a variety of alcohol marketing, that  
15 awareness is associated with increased consumption and higher-risk drinking in current  
16 drinkers, and that ownership of branded merchandise is associated with susceptibility in  
17 never-drinkers. We address key evidence gaps in the UK by exploring frequency of  
18 marketing awareness over a one-month period and demonstrating an association between  
19 marketing and both consumption and susceptibility in a demographically representative  
20 sample of young people above and below the legal purchasing age.

21 The findings are consistent with suggestions that alcohol marketing appears in  
22 contexts which may reach young people, including those under the legal purchasing age [8,9].  
23 That awareness included mass media marketing (e.g. television), alternative marketing (e.g.  
24 sponsorship and celebrity endorsement), consumer marketing (e.g. price offers), and new  
25 media marketing highlights the dynamic nature of '360-degree' marketing strategies and how

**Running head:** Alcohol marketing and consumption in young people in the UK

1 they reach young people in offline and online environments [9,33]. By measuring frequency  
2 of awareness, the results extend understanding by showing how often young people saw  
3 marketing; with at least one-in-ten reporting daily or almost daily awareness through three of  
4 the nine channels. That frequency of awareness was particularly high for television and  
5 celebrity endorsement is consistent with research which has found that alcohol appears  
6 frequently in popular television shows and sports broadcasts [13,17]. Approximately half of  
7 the sample had seen at least 32 instances of marketing per month, which equates to at least  
8 one a day. Although there were expected differences in awareness between drinkers and  
9 never-drinkers [27], there were no differences between key demographic groups, including  
10 ethnicity, indices of deprivation, and resident country. This suggests that exposure to  
11 marketing occurs in young people across the UK, and is not isolated to a minority of  
12 demographic groups.

13         The results are consistent with longitudinal research which has shown a link between  
14 marketing and increased consumption in young people [22,23]. Although marketing  
15 awareness did not have an association with susceptibility in never-drinkers, ownership of  
16 branded merchandise did. Research has reported that participation with marketing has a  
17 stronger association with consumption than awareness [27,28,34]. Our findings therefore  
18 suggest that the effect of participation is pronounced in never-drinkers. The findings also  
19 extend understanding by showing an association between marketing and consumption across  
20 young adulthood. This includes an association with susceptibility and consumption in young  
21 people under the legal purchasing age and higher-risk drinking in newly-legal drinkers.  
22 Newly legal drinkers are an important target for alcohol marketers [18] and are a key under-  
23 researched group [35]. The findings therefore highlight the importance of considering the  
24 wider role that marketing plays on consumption, not just under the purchasing age.

**Running head:** Alcohol marketing and consumption in young people in the UK

1  
2  
3 1 Except for the Scottish Government's decision to implement minimum unit pricing  
4  
5 2 [36], there has been little change to the UK's self-and-co-regulatory framework for alcohol  
6  
7 3 marketing [37,38]. It is claimed that such self-regulatory approaches provide inadequate  
8  
9 4 restrictions, are not suitably enforced, are retrospective and slow to react to complaints, and  
10  
11 5 lack meaningful sanctions [9,39-41]. Although statutory regulations are cited as an alternative  
12  
13 6 approach [26], studies have also questioned whether current examples, such as the Loi Évin  
14  
15 7 in France, are being enforced properly or whether they reduce marketing exposure [13,31].  
16  
17 8 Further research exploring the perspectives of stakeholders involved in the production,  
18  
19 9 research, consumption, and regulation of marketing would be of value to identify feasible and  
20  
21 10 effective options to reduce youth exposure and form a consensus on appropriate action  
22  
23 11 [42,43].

24  
25  
26 12 There are limitations and directions for future research. The cross-sectional design  
27  
28 13 cannot identify a causal relationship between marketing and consumption, albeit a directional  
29  
30 14 effect is supported by longitudinal research [22,23]. That marketing had any association with  
31  
32 15 consumption and susceptibility, after controlling for confounding variables, suggests that  
33  
34 16 marketing must at least play either an initiating or reinforcing role. The study also only  
35  
36 17 sampled teenagers ( $\leq 19$  years old) and, consequently, the results are only partially  
37  
38 18 representative of legal purchasing adults, albeit other research has shown similar trends in  
39  
40 19 older young adult populations [34]. This study only explored a direct association between  
41  
42 20 marketing and consumption. Qualitative research suggests that young people's relationship  
43  
44 21 with marketing is more complex than an 'exposure equals consumption' hypothesis, and that  
45  
46 22 marketing holds cultural, social, and symbolic meaning [44,45]. Future research, based on  
47  
48 23 message interpretation process models [24], should explore the psychological and social  
49  
50 24 cognitive pathways which mediate the association between marketing and consumption.  
51  
52  
53  
54  
55  
56  
57  
58  
59  
60

**Running head:** Alcohol marketing and consumption in young people in the UK

1  
2  
3 1 Compared to other studies, the marketing channels measured are not exhaustive and  
4  
5 2 the results may underestimate awareness. Examples of omitted marketing include packaging,  
6  
7 3 cinema, product placement, point of sale, and a broader range of digital marketing [27,34,46].  
8  
9 4 It was also not possible to decipher whether ‘not sure’ responses indicated uncertainty over  
10  
11 5 whether a participant had seen alcohol marketed through that channel at all or whether they  
12  
13 6 were unsure on their frequency of awareness. This influenced the design of the regression  
14  
15 7 models (to account for a ‘Not sure’ category). Finally, except for owning branded  
16  
17 8 merchandise, the study only measured awareness of marketing, but not participation. As  
18  
19 9 participation is reported to have a stronger association with consumption [27,34,46], the  
20  
21 10 results may underestimate the association between marketing and consumption. Future  
22  
23 11 iterations of the Youth Alcohol Policy Survey should refine measurement tools to account for  
24  
25 12 participation and mediating social and marketing specific cognitive factors.  
26  
27  
28  
29  
30

**CONCLUSION**

31  
32  
33 15 This paper makes important contributions to understanding by exploring alcohol marketing  
34  
35 16 awareness, ownership of branded merchandise, and the association with consumption in a  
36  
37 17 representative sample of young people in the UK, three quarters of who were under the legal  
38  
39 18 purchasing age. The results highlight that ‘360-degree’ marketing strategies have created  
40  
41 19 several avenues for young people to be exposed to, or involved with, alcohol marketing, and  
42  
43 20 that this is associated with consumption and higher-risk drinking in current drinkers and  
44  
45 21 susceptibility in never drinkers above and below the legal purchasing age. Further scrutiny  
46  
47 22 and examination of the UK’s self-regulatory approach, and viable alternatives, is needed to  
48  
49 23 identify feasible, appropriate, and effective means of reducing marketing exposure in young  
50  
51 24 people.  
52  
53  
54  
55  
56  
57  
58  
59  
60

**Running head:** Alcohol marketing and consumption in young people in the UK

1  
2  
3  
4  
5  
6  
7  
8  
9  
10  
11  
12  
13  
14  
15  
16  
17  
18  
19  
20  
21  
22  
23  
24  
25  
26  
27  
28  
29  
30  
31  
32  
33  
34  
35  
36  
37  
38  
39  
40  
41  
42  
43  
44  
45  
46  
47  
48  
49  
50  
51  
52  
53  
54  
55  
56  
57  
58  
59  
60

1 **Author contribution statement:** LH, CT, and JV led on study design and data acquisition.  
2 LH, CT, JV were involved in design of the study tools with support from AMM. NC and  
3 AMM planned the analysis, and this was conducted by AMM. NC and AMM lead on  
4 interpretation of the results, with input from LH, CT, and JV. NC drafted the manuscript,  
5 with support from AMM on methods and results, and all authors provided feedback and  
6 approved the final version of the manuscript.

8 **Acknowledgements:** The authors thank YouGov for their assistance in preparing and  
9 managing delivery of the survey and data. We also thank NatCen Social Research for their  
10 contribution to the original scoping studies used in the development of this project.

12 **Funding:** This work was supported by a grant from Cancer Research UK (1107098).

14 **Declaration of interest:** Nathan Critchlow is a board member of Alcohol Focus Scotland.

15 All other authors have no conflict of interest to declare.

17 **Data sharing statement:** No additional data are available.

**Running head:** Alcohol marketing and consumption in young people in the UK**REFERENCES**

1. Newbury-Birch D, Walker J, Avery L, *et al*. *Impact of alcohol consumption on young people: A systematic review of published reviews*, London: Department for Children, Schools and Family, 2009.
2. McCambridge J, McAlaney K, Rowe R. Adult consequences of late adolescent alcohol consumption: A systematic review of cohort studies. *PloS Medicine* 2011;8(2):e1000413.
3. World Health Organisation. *Global status report on alcohol and health 2014*. Geneva: World Health Organisation, 2014.
4. National Health Service Digital. *Smoking, drinking, and drug use among young people: England, 2016*. London: Health and Social Care Information Service, 2017.
5. Public Health Wales Observatory. *Alcohol and health in Wales 2014: Wales profile*. Cardiff: Public Health Wales Observatory, 2014.
6. Scottish Government. *Scottish Schools Adolescent Lifestyle and Substance Use Survey (SALSUS): Alcohol report (2015)*. Edinburgh: Scottish Government, 2016.
7. Public Health England. *The public health burden of alcohol and the effectiveness and cost-effectiveness of alcohol control policies: An evidence review*. London: Public Health England, 2016.
8. Hastings G. Alcohol marketing: Grooming the next generation. *BMJ*;346:f1227.
9. Alcohol Focus Scotland. *Alcohol Focus Scotland*. Glasgow: Alcohol Focus Scotland, 2017.
10. Dade P. *Drink talking: 100 years of alcohol advertising*, Middlesex: Middlesex University Press, 2008.
11. Diageo. *Annual report, 2017*. London: Diageo PLC, 2017.

**Running head:** Alcohol marketing and consumption in young people in the UK

12. Collin J, Hill SE, Smith KE. Merging alcohol giants threaten global health. *BMJ* 2015;17(351):h6087.
13. Purves, RI, Critchlow N, Stead M *et al.* Alcohol marketing during the UEFA EURO 2016 football tournament: A frequency analysis. *Int J Environ Res Public Health* 2017;14(7):e704.
14. Atkinson AM, Ross-Houle KM, Begley E, *et al.* An exploration of alcohol advertising on social networking sites: An analysis of content, interactions and young people's perspectives. *Add Res Theory* 2016;25(2)91-102.
15. King C, Sigel M, Ross CS, *et al.* Alcohol advertising in magazines and underage readership: Are underage youth disproportionality exposed? *Alcohol: Clin Exp Res* 2017;41(1):1775-1782.
16. Thompson KM. Addiction media: Substances on screen. *Child Adolesc Psychiatr Clin N Am* 2005;14:473-489.
17. Lowe E, Britton J, Cranwell J. Alcohol content in the 'hyper reality' MTV show 'Geordie Shore'. *Alcohol Alcohol* 2018;53(1):337-343.
18. Hastings G, Brooks O, Stead M, *et al.* "They'll drink bucket loads of the stuff": An analysis of internal alcohol industry advertising documents. London: Alcohol Education Research Council, 2010.
19. Rhoades E, Jernigan DH. Risky messages in alcohol advertising, 2003-2007: results from content analysis. *J Adolesc Health* 2013;52(1):1116-121.
20. Jones, SC, Hall S, Kypri K. Should I drink responsibly, safely or properly? Confusing messages about reducing alcohol-related harm. *PLoS One* 2017;12(9):e0184705.
21. Smith SW, Atkin CK, Roznowski J. Are "drink responsibly" alcohol campaigns strategically ambiguous? *Health Commun.* 2006;20(1):1-11.

**Running head:** Alcohol marketing and consumption in young people in the UK

- 1  
2  
3 1 22. Anderson P, de Bruijn A, Angus K, *et al.* Impact of alcohol advertising and media  
4  
5 2 exposure on adolescent alcohol use: A systematic review of longitudinal studies.  
6  
7 3 *Alcohol Alcohol* 2009;44(3):229-243.  
8  
9 4 23. Jernigan DH, Noel J, Landon J, *et al.* Alcohol marketing and youth alcohol  
10  
11 5 consumption: A systematic review of longitudinal studies published since 2008.  
12  
13 6 *Addiction* 2018;112(S1):7-20.  
14  
15 7 24. Austin EW, Knaus C. Predicting the potential for risky behaviour among those “too  
16  
17 8 young” to drink as the result of appealing advertising. *J Health Commun.*  
18  
19 9 2000;5(1):13-27.  
20  
21 10 25. McClure AC, Stoolmiller M, Tanski SE, *et al.* Alcohol marketing receptivity,  
22  
23 11 marketing-specific cognitions and underage binge drinking. *Alcohol Clin Exp Res*  
24  
25 12 2013;37(1):404-413.  
26  
27 13 26. Alcohol Health Alliance. *Health First: An evidence-based alcohol strategy for the*  
28  
29 14 *UK*. Stirling: University of Stirling, 2013.  
30  
31 15 27. Gordon R, Harris F, MacKintosh AM, *et al.* Assessing the cumulative impact of  
32  
33 16 alcohol marketing on young people’s drinking: Cross-sectional data findings. *Addict*  
34  
35 17 *Res Theory* 2011;19(1):66-75.  
36  
37 18 28. Gordon R., MacKintosh AM., Moodie C. The impact of alcohol marketing on youth  
38  
39 19 drinking behaviour: A two stage cohort study. *Alcohol Alcohol* 2010;45(5):470-480.  
40  
41 20 29. YouGov. *Panel methodology*. Available from: [https://yougov.co.uk/about/panel-](https://yougov.co.uk/about/panel-methodology/)  
42  
43 21 [methodology/](https://yougov.co.uk/about/panel-methodology/) [accessed 6<sup>th</sup> June 2018].  
44  
45 22 30. Ford A, MacKintosh AM, Moodie C, *et al.* Cigarette pack design and adolescent  
46  
47 23 smoking susceptibility: a cross-sectional survey. *BMJ Open* 2013;3:e003282.  
48  
49  
50  
51  
52  
53  
54  
55  
56  
57  
58  
59  
60



**Running head:** Alcohol marketing and consumption in young people in the UK

- 1  
2  
3 1 31. Gallopel-Morvan K, Spilka S, Mutatayi C, *et al.* France's Évin law on the control of  
4  
5 2 alcohol advertising: Content, effectiveness, and limitations. *Addiction*  
6  
7 3 2017;112(S1):86-93.  
8  
9 4 32. Research in Practice. *Scoring standardised measures – All measures and guidance.*  
10  
11 5 Available from: [https://www.rip.org.uk/resources/publications/practice-tools-and-](https://www.rip.org.uk/resources/publications/practice-tools-and-guides/scoring-standardised-measures--all-measures-and-guidance-compilation-2015/)  
12  
13 6 [guides/scoring-standardised-measures--all-measures-and-guidance-compilation-2015/](https://www.rip.org.uk/resources/publications/practice-tools-and-guides/scoring-standardised-measures--all-measures-and-guidance-compilation-2015/)  
14  
15 7 [accessed 6<sup>th</sup> June 2018].  
16  
17 8 33. Chester J, Montgomery K, Dorfman L. *Alcohol marketing in the digital age.* Berkley,  
18  
19 9 CA: Berkley Media Studies Group, 2010.  
20  
21 10 34. Critchlow N, Moodie C, Bauld L, *et al.* Awareness of, and participation with, digital  
22  
23 11 alcohol marketing, and the association with frequency of high episodic drinking  
24  
25 12 among young adults. *Drugs* 2016;23(4):328-336.  
26  
27 13 35. Meier PS. Alcohol marketing research: The need for a new agenda. *Addiction*  
28  
29 14 2011;106(3):466-471.  
30  
31 15 36. Holmes J, Meier PS, Angus C, *et al.* Scotland's policy on minimum unit pricing for  
32  
33 16 alcohol: The legal barriers are gone so what are the implications for implementation  
34  
35 17 and evaluation? *Addiction* 2018;113(2):203-204.  
36  
37 18 37. Advertising Standards Authority. *Committee of Advertising Practitioners Code*  
38  
39 19 *(Broadcast): 18, Alcohol*, London: Advertising Standards Authority, 2018.  
40  
41 20 38. Portman Group. *Code of practice on the naming, packaging, and promotion of*  
42  
43 21 *alcoholic drinks* (5<sup>th</sup> Edition). London: The Portman Group, 2015.  
44  
45 22 39. Hastings G, Brooks O, Stead M, *et al.* (2010). Failure of self-regulation of UK alcohol  
46  
47 23 advertising. *BMJ* 2010;340:b5650.  
48  
49  
50  
51  
52  
53  
54  
55  
56  
57  
58  
59  
60

**Running head:** Alcohol marketing and consumption in young people in the UK

- 1  
2  
3 1 40. Noel JK, Babor TF, Does industry self-regulation protect young from exposure to  
4  
5 2 alcohol marketing? A review of compliance and compliant studies. *Addiction*  
6  
7 3 2017;112(S1):51-56.  
8  
9 4 41. Alcohol Concern and Alcohol Research UK. *Fit for purpose?* An analysis of the role  
10  
11 5 of the Portman Group in alcohol industry self-regulation. London: Alcohol Concern  
12  
13 6 and Alcohol Research UK, 2018.  
14  
15 7 42. Fogarty AS, Chapman S. What should be done about policy on alcohol pricing and  
16  
17 8 promotions? Australians experts' views of policy priorities: A qualitative interviews  
18  
19 9 study. *BMC Public Health* 2013;13:610.  
20  
21 10 43. Morey Y, Eadie D, Purves RI, *et al.* *Specialist views of alcohol marketing regulation*  
22  
23 11 *in the UK*, London: Cancer Research UK, 2017.  
24  
25 12 44. Morey Y, Eadie D, Purves RI, *et al.* *Youth engagement with alcohol brands in the*  
26  
27 13 *UK*, London: Cancer Research UK, 2017.  
28  
29 14 45. Purves RI, Stead M, Eadie D. "I wouldn't be friends with some if they were liking too  
30  
31 15 much rubbish": A qualitative study of alcohol brands, youth identify, and social  
32  
33 16 media. *Int J Environ Res Public Health* 2018;15(2):e349.  
34  
35 17 46. Lin EY, Casswell S, You RQ, *et al.* Engagement alcohol marketing and early brand  
36  
37 18 allegiance in relation to early years of drinking. *Add Res Theory* 2012;20(4):329-338.  
38  
39 19  
40  
41 20  
42  
43 21  
44  
45 22  
46  
47 23  
48  
49 24  
50  
51 25  
52  
53  
54  
55  
56  
57  
58  
59  
60

**Running head:** Alcohol marketing and consumption in young people in the UK

**Table 1.** Awareness of alcohol marketing in the past month for young people in the UK

|                                                                                   | Every day<br>[28] <sup>1</sup> | 5-6 times<br>per week<br>[22] <sup>1</sup> | 3-4 times<br>per week<br>[14] <sup>1</sup> | 1-2 times<br>per week<br>[6] <sup>1</sup> | Less than<br>once a week<br>[2] <sup>1</sup> | Not in the<br>last month<br>[0] <sup>1</sup> | Not<br>sure | Seen<br>at<br>least<br>weekly | Median<br>Score<br>(IQR) <sup>2</sup> |
|-----------------------------------------------------------------------------------|--------------------------------|--------------------------------------------|--------------------------------------------|-------------------------------------------|----------------------------------------------|----------------------------------------------|-------------|-------------------------------|---------------------------------------|
| Marketing channel                                                                 | %                              | %                                          | %                                          | %                                         | %                                            | %                                            | %           | %                             |                                       |
| Adverts for alcohol                                                               |                                |                                            |                                            |                                           |                                              |                                              |             |                               |                                       |
| ... in newspapers or magazines                                                    | 1.9                            | 1.8                                        | 4.9                                        | 10.2                                      | 12.2                                         | 42.3                                         | 26.8        | 18.8                          | 0 (6)                                 |
| ... on television                                                                 | 5.0                            | 5.4                                        | 12.0                                       | 20.5                                      | 15.4                                         | 22.4                                         | 19.3        | 42.9                          | 6 (14)                                |
| ... on billboards                                                                 | 3.0                            | 3.1                                        | 7.4                                        | 14.3                                      | 17.2                                         | 30.2                                         | 24.8        | 27.9                          | 2 (6)                                 |
| ... on radio                                                                      | 1.1                            | 1.0                                        | 2.3                                        | 5.1                                       | 7.1                                          | 54.7                                         | 28.8        | 9.4                           | 0 (0)                                 |
| ... on YouTube, Tumblr, Facebook, Snapchat, Instagram or other social media       | 2.9                            | 2.3                                        | 8.1                                        | 14.0                                      | 15.6                                         | 32.1                                         | 25.0        | 27.3                          | 2 (6)                                 |
| Famous people in films, music videos, on TV or pictured in magazines with alcohol | 4.9                            | 5.3                                        | 10.8                                       | 17.6                                      | 14.4                                         | 23.2                                         | 23.6        | 38.7                          | 6 (14)                                |
| Sport sponsorship                                                                 | 2.4                            | 3.4                                        | 7.9                                        | 17.0                                      | 17.4                                         | 27.8                                         | 24.1        | 30.7                          | 2 (6)                                 |
| Special offers                                                                    | 5.3                            | 5.3                                        | 12.3                                       | 18.8                                      | 14.1                                         | 21.3                                         | 22.8        | 41.7                          | 6 (14)                                |
| Competitions                                                                      | 1.4                            | 1.2                                        | 2.8                                        | 8.2                                       | 11.9                                         | 45.6                                         | 29.0        | 13.6                          | 0 (2)                                 |

Notes:

<sup>1</sup> Score for estimating the approximate number of days on which noticed alcohol marketing in a one month period.

<sup>2</sup> Median number of alcohol marketing instances noticed in a one month period.

Base: All respondents (n=3,399): weighted.

## Running head: Alcohol marketing and consumption in young people in the UK

**Table 2.** Classification of alcohol marketing awareness (low, medium, and high) by demographic and confounding variables

| Variable                   | Valid n<br>(n = 1,411) <sup>1</sup> |   | Low awareness<br>(score: ≤16) | Medium awareness<br>(score: 17 -53) | High awareness<br>(score: ≥ 54) | $\chi^2$ | p      |
|----------------------------|-------------------------------------|---|-------------------------------|-------------------------------------|---------------------------------|----------|--------|
| <b>Gender</b>              |                                     |   |                               |                                     |                                 | 9.26     | <0.01  |
| Male                       | 735                                 | % | 32.1                          | 30.5                                | 37.4                            |          |        |
| Female                     | 676                                 | % | 37.3                          | 32.8                                | 29.9                            |          |        |
| <b>Ethnicity</b>           |                                     |   |                               |                                     |                                 | 1.09     | n.s.   |
| White British              | 1082                                | % | 35.0                          | 29.3                                | 35.6                            |          |        |
| Other ethnicity            | 317                                 | % | 34.5                          | 32.3                                | 33.3                            |          |        |
| <b>IMD Quintile</b>        |                                     |   |                               |                                     |                                 | 10.56    | n.s.   |
| 1 (most deprived)          | 247                                 | % | 34.4                          | 26.3                                | 39.3                            |          |        |
| 2                          | 266                                 | % | 35.7                          | 28.2                                | 36.1                            |          |        |
| 3                          | 288                                 | % | 36.8                          | 31.9                                | 31.3                            |          |        |
| 4                          | 292                                 | % | 32.2                          | 34.6                                | 33.2                            |          |        |
| 5 (least deprived)         | 317                                 | % | 34.1                          | 35.3                                | 30.6                            |          |        |
| <b>Country lived in</b>    |                                     |   |                               |                                     |                                 | 6.89     | n.s.   |
| England                    | 1230                                | % | 34.5                          | 32.0                                | 33.6                            |          |        |
| Scotland                   | 93                                  | % | 34.4                          | 33.3                                | 32.3                            |          |        |
| Wales                      | 53                                  | % | 39.6                          | 30.2                                | 30.2                            |          |        |
| Northern Ireland           | 34                                  | % | 29.4                          | 17.6                                | 52.9                            |          |        |
| <b>Legal purchase age</b>  |                                     |   |                               |                                     |                                 | 14.10    | <0.01  |
| No                         | 995                                 | % | 37.6                          | 30.7                                | 31.8                            |          |        |
| Yes                        | 416                                 | % | 27.4                          | 33.7                                | 38.9                            |          |        |
| <b>Current drinker</b>     |                                     |   |                               |                                     |                                 | 114.04   | <0.001 |
| No                         | 609                                 | % | 49.9                          | 26.9                                | 23.2                            |          |        |
| Yes                        | 330                                 | % | 23.1                          | 34.8                                | 42.1                            |          |        |
| <b>Higher risk drinker</b> |                                     |   |                               |                                     |                                 | 85.84    | <0.001 |
| No                         | 1027                                | % | 41.7                          | 29.1                                | 29.2                            |          |        |
| Yes                        | 384                                 | % | 15.6                          | 38.3                                | 46.1                            |          |        |
| <b>Education</b>           |                                     |   |                               |                                     |                                 | 13.90    | <0.001 |
| Not in education           | 79                                  | % | 17.7                          | 31.6                                | 50.6                            |          |        |
| In education               | 1330                                | % | 35.6                          | 31.7                                | 32.8                            |          |        |
| <b>Working status</b>      |                                     |   |                               |                                     |                                 | 7.93     | <0.05  |
| Not in work                | 1282                                | % | 35.6                          | 31.6                                | 32.8                            |          |        |
| In work                    | 127                                 | % | 24.4                          | 32.3                                | 43.3                            |          |        |
| <b>Parents accept use</b>  |                                     |   |                               |                                     |                                 | 63.06    | <0.001 |
| No                         | 722                                 | % | 44.2                          | 28.4                                | 27.4                            |          |        |
| Yes                        | 689                                 | % | 24.4                          | 35.0                                | 40.6                            |          |        |
| <b>Peer accept use</b>     |                                     |   |                               |                                     |                                 | 73.08    | <0.001 |
| No                         | 410                                 | % | 51.5                          | 24.4                                | 24.1                            |          |        |
| Yes                        | 1001                                | % | 27.7                          | 34.6                                | 37.8                            |          |        |

Notes: Valid sample refers to those for whom it was possible to compute an aggregate awareness score (i.e. excluding those who had reported 'not sure' to any marketing channels).

$\chi^2$  = Bivariate Pearson Chi Square

1  
2  
3  
4  
5  
6  
7  
8  
9  
10  
11  
12  
13  
14  
15  
16  
17  
18  
19  
20  
21  
22  
23  
24  
25  
26  
27  
28  
29  
30  
31  
32  
33  
34  
35  
36  
37  
38  
39  
40  
41  
42  
43  
44  
45  
46  
47

**Running head:** Alcohol marketing and consumption in young people in the UK

For peer review only

**Running head: Alcohol marketing and consumption in young people in the UK****Table 3.** Association between alcohol marketing awareness and AUDIT-C scoring in current drinkers

| Variables and reference categories                            | Unstandardized coefficients |               |               |      | Standard |          |          |
|---------------------------------------------------------------|-----------------------------|---------------|---------------|------|----------|----------|----------|
|                                                               | <i>b</i>                    | 95% CI<br>Low | 95% CI<br>Low | SE   | $\beta$  | <i>t</i> | <i>p</i> |
| <b>Constant</b>                                               | -5.57                       | -7.05         | -4.09         | 0.75 |          | -7.40    | <0.001   |
| <b>Age</b>                                                    | 0.43                        | 0.35          | 0.51          | 0.04 | 0.30     | 10.70    | <0.001   |
| <b>Gender</b>                                                 |                             |               |               |      |          |          |          |
| Male ( <i>vs. female</i> )                                    | 0.31                        | 0.09          | 0.54          | 0.11 | 0.06     | 2.76     | 0.006    |
| <b>Ethnicity</b>                                              |                             |               |               |      |          |          |          |
| White British ( <i>vs. other</i> )                            | 0.08                        | -0.24         | 0.40          | 0.16 | 0.01     | 0.52     | n.s.     |
| <b>IMD Quintile</b>                                           |                             |               |               |      |          |          |          |
| (1 : most deprived to 5: most affluent)                       | 0.11                        | 0.03          | 0.20          | 0.04 | 0.06     | 2.68     | 0.007    |
| <b>Country</b>                                                |                             |               |               |      |          |          |          |
| Scotland ( <i>vs. England</i> )                               | -0.05                       | -0.40         | 0.31          | 0.18 | -0.01    | -0.26    | n.s.     |
| Wales & Northern Ireland ( <i>vs. England</i> )               | -0.37                       | -0.76         | 0.01          | 0.20 | -0.04    | -1.90    | n.s.     |
| <b>Educational status</b>                                     |                             |               |               |      |          |          |          |
| In education ( <i>vs. not</i> )                               | 0.66                        | 0.55          | 1.10          | 0.22 | 0.07     | 2.96     | 0.003    |
| <b>Working status</b>                                         |                             |               |               |      |          |          |          |
| Working ( <i>vs. not</i> )                                    | 0.31                        | -0.06         | 0.67          | 0.19 | 0.04     | 1.66     | n.s.     |
| <b>Living status</b>                                          |                             |               |               |      |          |          |          |
| Living independently ( <i>vs. with parents/adult family</i> ) | 0.87                        | 0.54          | 1.20          | 0.17 | 0.12     | 5.17     | <0.001   |
| Not stated ( <i>vs. with parents/adult family</i> )           | 0.42                        | -0.66         | 1.49          | 0.55 | 0.02     | 0.76     | n.s.     |
| <b>Frequency of mother drinking</b>                           |                             |               |               |      |          |          |          |
| Never ( <i>vs. at least monthly</i> )                         | 0.04                        | -0.41         | 0.49          | 0.23 | 0.00     | 0.17     | n.s.     |
| Less than monthly ( <i>vs. at least monthly</i> )             | -0.31                       | -0.63         | 0.00          | 0.16 | -0.04    | -1.94    | n.s.     |
| Not stated ( <i>vs. at least monthly</i> )                    | 0.42                        | -0.04         | 0.71          | 0.31 | 0.03     | 1.33     | n.s.     |
| <b>Frequency of father drinking</b>                           |                             |               |               |      |          |          |          |
| Never ( <i>vs. at least monthly</i> )                         | 0.21                        | -0.33         | 0.75          | 0.27 | 0.02     | 0.77     | n.s.     |
| Less than monthly ( <i>vs. at least monthly</i> )             | 0.32                        | -0.08         | 0.72          | 0.20 | 0.03     | 1.57     | n.s.     |
| Not stated ( <i>vs. at least monthly</i> )                    | 0.33                        | -0.04         | 0.71          | 0.19 | 0.04     | 1.76     | n.s.     |
| <b>Frequency of close friends drinking</b>                    |                             |               |               |      |          |          |          |
| At least weekly ( <i>vs. less often or never</i> )            | 1.44                        | 1.19          | 1.69          | 0.13 | 0.26     | 11.32    | <0.001   |
| Not stated ( <i>vs. less than weekly or never</i> )           | -0.49                       | -0.85         | -0.12         | 0.19 | -0.06    | -2.61    | <0.01    |
| <b>Parents' views</b>                                         |                             |               |               |      |          |          |          |
| Drinking acceptable ( <i>vs. neutral/unacceptable</i> )       | 0.29                        | 0.01          | 0.57          | 0.14 | 0.05     | 2.06     | <0.05    |
| <b>Peer views</b>                                             |                             |               |               |      |          |          |          |

**Running head: Alcohol marketing and consumption in young people in the UK**

|                                                                                                                                                                                                                                                                                                                      |       |       |       |      |       |       |        |
|----------------------------------------------------------------------------------------------------------------------------------------------------------------------------------------------------------------------------------------------------------------------------------------------------------------------|-------|-------|-------|------|-------|-------|--------|
| Drinking acceptable (vs. neutral/unacceptable)                                                                                                                                                                                                                                                                       | 0.08  | -0.32 | 0.48  | 0.21 | 0.01  | 0.38  | n.s.   |
| <b>Age of first drink</b>                                                                                                                                                                                                                                                                                            |       |       |       |      |       |       |        |
| Age 13 or under (vs. 14 to 15 years)                                                                                                                                                                                                                                                                                 | 0.22  | -0.07 | 0.51  | 0.15 | 0.04  | 1.50  | n.s.   |
| Age 16 or over (vs. 14 to 15 years)                                                                                                                                                                                                                                                                                  | -1.33 | -1.63 | -1.04 | 0.15 | -0.21 | -8.82 | <0.001 |
| Not stated (vs. 14 to 15 years)                                                                                                                                                                                                                                                                                      | -0.48 | -0.89 | -0.07 | 0.21 | -0.05 | -2.28 | <0.05  |
| <b>Alcohol Marketing Awareness</b>                                                                                                                                                                                                                                                                                   |       |       |       |      |       |       |        |
| Medium (vs. low awareness)                                                                                                                                                                                                                                                                                           | 0.79  | 0.37  | 1.21  | 0.21 | 0.11  | 3.70  | <0.001 |
| High (vs. low awareness)                                                                                                                                                                                                                                                                                             | 0.85  | 0.44  | 1.26  | 0.21 | 0.12  | 4.08  | <0.001 |
| Not stated (vs. low awareness)                                                                                                                                                                                                                                                                                       | 0.40  | 0.04  | 0.76  | 0.18 | 0.07  | 2.20  | <0.05  |
| <b>Own alcohol branded merchandise</b>                                                                                                                                                                                                                                                                               |       |       |       |      |       |       |        |
| Yes (vs. no/not sure)                                                                                                                                                                                                                                                                                                | 0.79  | 0.55  | 1.04  | 0.13 | 0.13  | 6.30  | <0.001 |
| Notes:<br>Based on current drinkers: $n = 1,592$<br>DV = AUDIT-C Scoring (0-12)<br>Model shown is final block. Total variance explained (Adj. $R^2 = 0.36$ ). Durbin Watson = 2.01.<br>Final step model change: $F(4, 1,564) = 17.44, p < 0.001$ .<br>Overall Final model ANOVA: $F(27, 1,564) = 34.34, p < 0.001$ . |       |       |       |      |       |       |        |

**Running head:** Alcohol marketing and consumption in young people in the UK**Table 4.** Logistic regression of association between alcohol marketing and higher risk consumption among current drinkers

|                                       | Higher risk consumption among current drinkers |                  |        |        |          |
|---------------------------------------|------------------------------------------------|------------------|--------|--------|----------|
|                                       | <i>n</i>                                       | AOR <sup>1</sup> | 95% CI | 95% CI | <i>p</i> |
| <b>Age</b>                            | 1,131                                          | 1.40             | 1.28   | 1.53   | <0.001   |
| <b>Gender</b>                         |                                                |                  |        |        |          |
| Female                                | 824                                            | Ref              |        |        |          |
| Male                                  | 768                                            | 1.32             | 1.04   | 1.68   | 0.022    |
| <b>Ethnicity</b>                      |                                                |                  |        |        |          |
| Other                                 | 228                                            | Ref              |        |        |          |
| White British                         | 1,364                                          | 0.97             | 0.69   | 1.37   | n.s.     |
| <b>IMD Quintile</b>                   |                                                |                  |        |        | n.s.     |
| 1 (most deprived)                     | 232                                            | Ref              |        |        |          |
| 2                                     | 334                                            | 1.65             | 1.08   | 2.52   | 0.021    |
| 3                                     | 324                                            | 1.26             | 0.90   | 1.76   | n.s.     |
| 4                                     | 340                                            | 1.21             | 0.90   | 1.64   | n.s.     |
| 5 (most affluent)                     | 362                                            | 1.23             | 0.93   | 1.64   | n.s.     |
| <b>Country</b>                        |                                                |                  |        |        | n.s.     |
| England                               | 1,243                                          | Ref              |        |        |          |
| Scotland                              | 197                                            | 0.88             | 0.60   | 1.28   | n.s.     |
| Wales                                 | 116                                            | 0.58             | 0.36   | 0.93   | 0.024    |
| Northern Ireland                      | 36                                             | 1.35             | 0.60   | 3.01   | n.s.     |
| <b>Educational status</b>             |                                                |                  |        |        |          |
| Not in education                      | 146                                            | Ref              |        |        |          |
| In education                          | 1,446                                          | 1.61             | 1.01   | 2.55   | 0.045    |
| <b>Working status</b>                 |                                                |                  |        |        |          |
| Not working                           | 1,374                                          | Ref              |        |        |          |
| Working (full or part-time)           | 218                                            | 1.43             | 0.97   | 2.09   | n.s.     |
| <b>Living status</b>                  |                                                |                  |        |        |          |
| Living with parents/adult family      | 1,307                                          | Ref              |        |        |          |
| Living independently                  | 268                                            | 1.56             | 1.09   | 2.23   | 0.015    |
| Not stated                            | 17                                             | 1.58             | 0.54   | 4.60   | n.s.     |
| <b>Frequency of mother drinking</b>   |                                                |                  |        |        | 0.012    |
| Never                                 | 115                                            | ref              |        |        |          |
| Less than monthly vs. never           | 284                                            | 0.47             | 0.27   | 0.79   | 0.005    |
| Monthly or fortnightly vs. less often | 279                                            | 1.22             | 0.83   | 1.79   | n.s.     |
| At least weekly vs. less often        | 849                                            | .93              | .70    | 1.24   | n.s.     |
| Not stated vs. all other categories   | 65                                             | 1.50             | .78    | 2.88   | n.s.     |
| <b>Frequency of father drinking</b>   |                                                |                  |        |        | n.s.     |
| Never                                 | 76                                             | ref              |        |        |          |
| Less than monthly vs. never           | 160                                            | 1.40             | 0.72   | 2.73   | n.s.     |
| Monthly or fortnightly vs. less often | 201                                            | 0.73             | 0.46   | 1.19   | n.s.     |
| At least weekly vs. less often        | 964                                            | 0.83             | 0.61   | 1.15   | n.s.     |



**Running head: Alcohol marketing and consumption in young people in the UK**

|                                            |       |      |      |      |        |
|--------------------------------------------|-------|------|------|------|--------|
| Not stated vs. all other categories        | 191   | 1.14 | 0.75 | 1.72 | n.s.   |
| <b>Frequency of close friends drinking</b> |       |      |      |      | <0.001 |
| Never                                      | 72    | ref  |      |      |        |
| Less than monthly vs. never                | 187   | 0.68 | 0.32 | 1.42 | n.s.   |
| Monthly or fortnightly vs. less often      | 463   | 2.20 | 1.44 | 3.35 | <0.001 |
| At least weekly vs. less often             | 667   | 3.41 | 2.48 | 4.70 | <0.001 |
| Not stated vs. all other categories        | 203   | 0.57 | 0.37 | 0.89 | 0.013  |
| <b>Parents' views</b>                      |       |      |      |      |        |
| Neutral or unacceptable                    | 473   | Ref  |      |      |        |
| Drinking acceptable                        | 1,119 | 0.92 | 0.68 | 1.24 | n.s.   |
| <b>Peer views</b>                          |       |      |      |      |        |
| Neutral or unacceptable                    | 156   | Ref  |      |      |        |
| Drinking acceptable                        | 1,436 | 1.41 | 0.88 | 2.25 | n.s.   |
| <b>Age of first drink</b>                  |       |      |      |      | <0.001 |
| Age 13 or under                            | 472   | Ref  |      |      |        |
| Age 14 to 15 (vs. 13 or under)             | 535   | 0.86 | 0.63 | 1.18 | n.s.   |
| Age 16 or over (vs. younger)               | 412   | 0.26 | 0.19 | 0.35 | <0.001 |
| Not stated                                 | 173   | 0.89 | 0.59 | 1.35 | n.s.   |
| <b>Alcohol Marketing Awareness</b>         |       |      |      |      | <0.001 |
| Low awareness                              | 184   | Ref  |      |      |        |
| Medium vs. low                             | 274   | 2.18 | 1.39 | 3.42 | <0.001 |
| High vs. medium and low                    | 326   | 1.43 | 1.01 | 2.02 | 0.45   |
| Not stated vs. all other categories        | 808   | 0.85 | 0.67 | 1.08 | n.s.   |
| <b>Own alcohol branded merchandise</b>     |       |      |      |      |        |
| No or not sure                             | 1,138 | Ref  |      |      |        |
| Yes                                        | 454   | 1.71 | 1.31 | 2.22 | <0.001 |

Notes:

Based on current drinkers ( $n = 1,592$ )

DV: Higher risk drinking on the AUDIT-C ( $\geq 5$ ), 1 = Higher risk ( $n = 699$ ) and 0 = Lower risk ( $n = 893$ )

Test of model coefficients in final block:  $\chi^2 (35) = 477.29, p < 0.001$ .

Hosmer & Lemeshow for final block  $\chi^2 (8) = 11.66, p = 0.17$ .

Nagelkerke  $R^2$  for final block = 0.35.

Cases correctly classified in final block: 72% in final block

<sup>1</sup> Adjusted for all other variables in the model, Adj OR, adjusted odds ratio; ref, reference category; 95% CI, 95% confidence interval

**Running head:** Alcohol marketing and consumption in young people in the UK**Table 5.** Logistic regression of association between alcohol marketing and never drinkers' susceptibility to drink

|                                       | Susceptibility to drink among never drinkers |           |           |           |          |
|---------------------------------------|----------------------------------------------|-----------|-----------|-----------|----------|
|                                       | <i>n</i>                                     | Adj<br>OR | 95%<br>CI | 95%<br>CI | <i>p</i> |
| <b>Age</b>                            | 1580                                         | 1.05      | 0.98      | 1.13      | n.s.     |
| <b>Gender</b>                         |                                              |           |           |           |          |
| Female                                | 791                                          | ref       |           |           |          |
| Male                                  | 789                                          | 1.09      | 0.88      | 1.37      | n.s.     |
| <b>Ethnicity</b>                      |                                              |           |           |           |          |
| Other                                 | 377                                          | ref       |           |           |          |
| White British                         | 1203                                         | 1.51      | 1.12      | 2.03      | 0.007    |
| <b>IMD Quintile</b>                   |                                              |           |           |           | n.s.     |
| 1 (most deprived)                     | 399                                          | ref       |           |           |          |
| 2                                     | 278                                          | 1.13      | 0.80      | 1.60      | n.s.     |
| 3                                     | 355                                          | 1.02      | 0.76      | 1.36      | n.s.     |
| 4                                     | 233                                          | 0.88      | 0.64      | 1.22      | n.s.     |
| 5 (most affluent)                     | 315                                          | 0.84      | 0.63      | 1.11      | n.s.     |
| <b>Country</b>                        |                                              |           |           |           | n.s.     |
| England                               | 1193                                         | ref       |           |           |          |
| Scotland                              | 191                                          | 1.14      | 0.80      | 1.61      | n.s.     |
| Wales                                 | 115                                          | 1.09      | 0.70      | 1.69      | n.s.     |
| Northern Ireland                      | 81                                           | 0.96      | 0.58      | 1.59      | n.s.     |
| <b>Educational status</b>             |                                              |           |           |           |          |
| Not in education                      | 25                                           | ref       |           |           |          |
| In education                          | 1555                                         | 0.67      | 0.20      | 2.25      | n.s.     |
| <b>Working status</b>                 |                                              |           |           |           |          |
| Not working                           | 1550                                         | ref       |           |           |          |
| Working (full or part-time)           | 30                                           | 2.59      | 0.83      | 8.11      | n.s.     |
| <b>Living status</b>                  |                                              |           |           |           | n.s.     |
| Living with parents/adult family      | 1545                                         | ref       |           |           |          |
| Living independently                  | 28                                           | 0.51      | 0.20      | 1.28      | n.s.     |
| Not stated                            | 7                                            | 1.57      | 0.27      | 9.11      | n.s.     |
| <b>Frequency of mother drinking</b>   |                                              |           |           |           | <0.001   |
| Never                                 | 321                                          | ref       |           |           | <0.001   |
| Less than monthly vs. never           | 382                                          | 2.38      | 1.58      | 3.59      | <0.001   |
| Monthly or fortnightly vs. less often | 242                                          | 1.66      | 1.15      | 2.39      | 0.006    |
| At least weekly vs. less often        | 560                                          | 1.47      | 1.11      | 1.94      | 0.007    |
| Not stated vs. all other categories   | 75                                           | 1.25      | 0.70      | 2.25      | n.s.     |
| <b>Frequency of father drinking</b>   |                                              |           |           |           | 0.023    |
| Never                                 | 273                                          | ref       |           |           |          |
| Less than monthly vs. never           | 217                                          | 1.88      | 1.17      | 3.01      | 0.009    |
| Monthly or fortnightly vs. less often | 232                                          | 1.11      | 0.75      | 1.64      | n.s.     |
| At least weekly vs. less often        | 686                                          | 1.39      | 1.05      | 1.84      | 0.021    |

**Running head: Alcohol marketing and consumption in young people in the UK**

|                                            |      |      |      |      |        |
|--------------------------------------------|------|------|------|------|--------|
| Not stated vs. all other categories        | 172  | 1.06 | 0.71 | 1.58 | n.s.   |
| <b>Frequency of close friends drinking</b> |      |      |      |      | <0.001 |
| Never                                      | 922  | ref  |      |      |        |
| Less than monthly vs. never                | 162  | 3.46 | 2.26 | 5.26 | <0.001 |
| Monthly or fortnightly vs. less often      | 80   | 3.32 | 1.66 | 6.65 | <0.001 |
| At least weekly vs. less often             | 83   | 0.70 | 0.39 | 1.26 | n.s.   |
| Not stated vs. all other categories        | 333  | 0.61 | 0.43 | 0.86 | 0.005  |
| <b>Parents' views</b>                      |      |      |      |      |        |
| Neutral or unacceptable                    | 1364 | ref  |      |      |        |
| Drinking acceptable                        | 216  | 1.00 | 0.70 | 1.44 | n.s.   |
| <b>Peer views</b>                          |      |      |      |      |        |
| Neutral or unacceptable                    | 894  | ref  |      |      |        |
| Drinking acceptable                        | 686  | 2.29 | 1.77 | 2.96 | <0.001 |
| <b>Alcohol Marketing Awareness</b>         |      |      |      |      | n.s.   |
| Low awareness                              | 279  | ref  |      |      |        |
| Medium vs. low                             | 148  | 1.44 | 0.92 | 2.28 | n.s.   |
| High vs. medium and low                    | 117  | 1.16 | 0.71 | 1.90 | n.s.   |
| Not stated vs. all other categories        | 1036 | 1.21 | 0.94 | 1.56 | n.s.   |
| <b>Own alcohol branded merchandise</b>     |      |      |      |      |        |
| No or not sure                             | 1476 | ref  |      |      |        |
| Yes                                        | 104  | 1.98 | 1.20 | 3.24 | 0.007  |

## Notes:

Based on never drinkers ( $n = 1,580$ )

DV: Susceptibility: 1 = Susceptible ( $n = 830$ ) = 0 Not susceptible ( $n = 750$ ).

Test of model coefficients in final block:  $\chi^2 (32) = 337.46, p < 0.001$ .

Hosmer & Lemeshow for final block  $\chi^2 (8) = 5.86, p < 0.001$

Nagelkerke  $R^2$  for final block = 0.26.

Cases correctly classified in final block: 69%

<sup>1</sup> adjusted for all other variables in the model, Adj OR, adjusted odds ratio; ref, reference category; 95% CI, 95% confidence interval

<sup>2</sup> Variable not applicable to those who were classed as 'never drinkers'

**STROBE 2007 (v4) Statement—Checklist of items that should be included in reports of *cross-sectional studies***

| Section/Topic                | Item # | Recommendation                                                                                                                                                                       | Reported on page # |
|------------------------------|--------|--------------------------------------------------------------------------------------------------------------------------------------------------------------------------------------|--------------------|
| Title and abstract           | 1      | (a) Indicate the study's design with a commonly used term in the title or the abstract                                                                                               | 1,2,3              |
|                              |        | (b) Provide in the abstract an informative and balanced summary of what was done and what was found                                                                                  | 2                  |
| <b>Introduction</b>          |        |                                                                                                                                                                                      |                    |
| Background/rationale         | 2      | Explain the scientific background and rationale for the investigation being reported                                                                                                 | 4,5,6              |
| Objectives                   | 3      | State specific objectives, including any prespecified hypotheses                                                                                                                     | 5,6                |
| <b>Methods</b>               |        |                                                                                                                                                                                      |                    |
| Study design                 | 4      | Present key elements of study design early in the paper                                                                                                                              | 6                  |
| Setting                      | 5      | Describe the setting, locations, and relevant dates, including periods of recruitment, exposure, follow-up, and data collection                                                      | 6                  |
| Participants                 | 6      | (a) Give the eligibility criteria, and the sources and methods of selection of participants                                                                                          | 6                  |
| Variables                    | 7      | Clearly define all outcomes, exposures, predictors, potential confounders, and effect modifiers. Give diagnostic criteria, if applicable                                             | 6,7,8,9            |
| Data sources/<br>measurement | 8*     | For each variable of interest, give sources of data and details of methods of assessment (measurement). Describe comparability of assessment methods if there is more than one group | 6,7,8,9            |
| Bias                         | 9      | Describe any efforts to address potential sources of bias                                                                                                                            | N/A                |
| Study size                   | 10     | Explain how the study size was arrived at                                                                                                                                            | N/A                |
| Quantitative variables       | 11     | Explain how quantitative variables were handled in the analyses. If applicable, describe which groupings were chosen and why                                                         | 9,10,11            |
| Statistical methods          | 12     | (a) Describe all statistical methods, including those used to control for confounding                                                                                                | 9,10,11            |
|                              |        | (b) Describe any methods used to examine subgroups and interactions                                                                                                                  | 9,10,11            |
|                              |        | (c) Explain how missing data were addressed                                                                                                                                          | 9,10,11            |
|                              |        | (d) If applicable, describe analytical methods taking account of sampling strategy                                                                                                   | 9,10,11            |
|                              |        | (e) Describe any sensitivity analyses                                                                                                                                                | N/A                |
| <b>Results</b>               |        |                                                                                                                                                                                      |                    |

|                          |     |                                                                                                                                                                                                              |                |
|--------------------------|-----|--------------------------------------------------------------------------------------------------------------------------------------------------------------------------------------------------------------|----------------|
| Participants             | 13* | (a) Report numbers of individuals at each stage of study—eg numbers potentially eligible, examined for eligibility, confirmed eligible, included in the study, completing follow-up, and analysed            | 11,12,13,14    |
|                          |     | (b) Give reasons for non-participation at each stage                                                                                                                                                         | 13,14          |
|                          |     | (c) Consider use of a flow diagram                                                                                                                                                                           | N/A            |
| Descriptive data         | 14* | (a) Give characteristics of study participants (eg demographic, clinical, social) and information on exposures and potential confounders                                                                     | 11             |
|                          |     | (b) Indicate number of participants with missing data for each variable of interest                                                                                                                          | 11,12,13       |
| Outcome data             | 15* | Report numbers of outcome events or summary measures                                                                                                                                                         | 11,12,13,14,15 |
| Main results             | 16  | (a) Give unadjusted estimates and, if applicable, confounder-adjusted estimates and their precision (eg, 95% confidence interval). Make clear which confounders were adjusted for and why they were included | 11,12,13,14,15 |
|                          |     | (b) Report category boundaries when continuous variables were categorized                                                                                                                                    | 11,12,13,14,15 |
|                          |     | (c) If relevant, consider translating estimates of relative risk into absolute risk for a meaningful time period                                                                                             | 11,12          |
| Other analyses           | 17  | Report other analyses done—eg analyses of subgroups and interactions, and sensitivity analyses                                                                                                               | N/A            |
| <b>Discussion</b>        |     |                                                                                                                                                                                                              |                |
| Key results              | 18  | Summarise key results with reference to study objectives                                                                                                                                                     | 15,18          |
| Limitations              | 19  | Discuss limitations of the study, taking into account sources of potential bias or imprecision. Discuss both direction and magnitude of any potential bias                                                   | 17,18          |
| Interpretation           | 20  | Give a cautious overall interpretation of results considering objectives, limitations, multiplicity of analyses, results from similar studies, and other relevant evidence                                   | 15,16,17,18    |
| Generalisability         | 21  | Discuss the generalisability (external validity) of the study results                                                                                                                                        | 15,16,17,18    |
| <b>Other information</b> |     |                                                                                                                                                                                                              |                |
| Funding                  | 22  | Give the source of funding and the role of the funders for the present study and, if applicable, for the original study on which the present article is based                                                | 19             |

\*Give information separately for cases and controls in case-control studies and, if applicable, for exposed and unexposed groups in cohort and cross-sectional studies.

**Note:** An Explanation and Elaboration article discusses each checklist item and gives methodological background and published examples of transparent reporting. The STROBE checklist is best used in conjunction with this article (freely available on the Web sites of PLoS Medicine at <http://www.plosmedicine.org/>, Annals of Internal Medicine at <http://www.annals.org/>, and Epidemiology at <http://www.epidem.com/>). Information on the STROBE Initiative is available at [www.strobe-statement.org](http://www.strobe-statement.org).

# BMJ Open

**Awareness of alcohol marketing, ownership of alcohol branded merchandise, and the association with alcohol consumption, higher-risk drinking, and drinking susceptibility in adolescents and young adults: A cross-sectional survey in the United Kingdom.**

|                                 |                                                                                                                                                                                                                                                                                                                                                                               |
|---------------------------------|-------------------------------------------------------------------------------------------------------------------------------------------------------------------------------------------------------------------------------------------------------------------------------------------------------------------------------------------------------------------------------|
| Journal:                        | <i>BMJ Open</i>                                                                                                                                                                                                                                                                                                                                                               |
| Manuscript ID                   | bmjopen-2018-025297.R1                                                                                                                                                                                                                                                                                                                                                        |
| Article Type:                   | Research                                                                                                                                                                                                                                                                                                                                                                      |
| Date Submitted by the Author:   | 12-Nov-2018                                                                                                                                                                                                                                                                                                                                                                   |
| Complete List of Authors:       | Critchlow, Nathan; University of Stirling, Institute for Social Marketing<br>Mackintosh, Anne Marie; University of Stirling Institute for Social Marketing<br>Thomas, Christopher; Cancer Research UK, Cancer Policy Research Centre<br>Hooper, Lucie; Cancer Research UK, Cancer Policy Research Centre<br>Vohra, Jyotsna; Cancer Research UK, Cancer Policy Research Centre |
| <b>Primary Subject Heading</b>: | Public health                                                                                                                                                                                                                                                                                                                                                                 |
| Secondary Subject Heading:      | Addiction, Public health                                                                                                                                                                                                                                                                                                                                                      |
| Keywords:                       | PUBLIC HEALTH, Alcohol, Young people, Alcohol Marketing, Survey, Alcohol Advertising                                                                                                                                                                                                                                                                                          |
|                                 |                                                                                                                                                                                                                                                                                                                                                                               |

SCHOLARONE™  
Manuscripts

**Running head:** Alcohol marketing and consumption in young people in the UK

**Title:** Awareness of alcohol marketing, ownership of alcohol branded merchandise, and the association with alcohol consumption, higher-risk drinking, and drinking susceptibility in adolescents and young adults: A cross-sectional survey in the United Kingdom.

**Running head:** Alcohol marketing and consumption in young people in the UK

**Authors**

Nathan Critchlow<sup>1</sup>

Anne Marie MacKintosh<sup>1</sup>

Christopher Thomas<sup>2</sup>

Lucie Hooper<sup>2</sup>

Jyotsna Vohra<sup>2</sup>

<sup>1</sup> Institute for Social Marketing, Faculty of Health Sciences and Sport, University of Stirling, Stirling.

<sup>2</sup> Cancer Policy Research Centre (CPRC), Cancer Research UK, London.

**Corresponding author**

Nathan Critchlow, Institute for Social Marketing, Faculty of Health Sciences and Sport, University of Stirling, Stirling, FK9 4LA. E-mail: [nathan.critchlow@stir.ac.uk](mailto:nathan.critchlow@stir.ac.uk); Tel: +44(0)1786467382.

**Word Count:** 4,491

**Table and figure count:** 6 (All tables)

**Running head:** Alcohol marketing and consumption in young people in the UK

**1 Awareness of alcohol marketing, ownership of alcohol branded merchandise, and the**  
**2 association with alcohol consumption, higher-risk drinking, and drinking susceptibility**  
**3 in adolescents and young adults: A cross-sectional survey in the United Kingdom.**

**4**  
**5 ABSTRACT**

**6 Objectives:** To explore awareness of alcohol marketing and ownership of alcohol branded  
**7 merchandise in adolescents and young adults in the United Kingdom (UK), what factors are**  
**8 associated with awareness and ownership, and what association awareness and ownership has**  
**9 with alcohol consumption, higher-risk drinking, and susceptibility.**

**10 Design:** Online cross-sectional survey conducted April–May 2017.

**11 Setting:** UK.

**12 Participants:** Adolescents and young adults aged 11-19 years old in the UK ( $n=3,399$ ).

**13 Main outcome measures:** Alcohol Use Disorders Identification Test–Consumption (AUDIT-  
**14 C) (0-12) and indication of higher-risk consumption ( $\geq 5$  AUDIT-C) in current drinkers.**  
**15 Susceptibility to drink in the next year (Yes/No) in never drinkers.**

**16 Results:** Eighty-two percent of respondents were aware of at least one form of alcohol  
**17 marketing in the past month and 17% owned branded merchandise. Chi-square tests found that**  
**18 higher awareness of marketing and ownership of branded merchandise was associated with**  
**19 being a current drinker ( $p<0.001$ ), higher-risk drinking ( $p<0.001$ ), frequency of parental and**  
**20 peer consumption ( $p<0.001$ ), and perceived parental ( $p<0.001$ ) and peer approval of**  
**21 consumption ( $p<0.001$ ). Among current drinkers, multivariate regressions (controlling for**  
**22 demographics and covariates) found that marketing awareness and owning branded**  
**23 merchandise was positively associated with AUDIT-C score and higher-risk consumption. For**  
**24 example, current drinkers reporting medium marketing awareness were twice as likely to be**  
**25 higher-risk drinkers as those reporting low awareness (AOR=2.18, 95% CI: 1.39-3.42,**  
**26  $p<0.001$ ). Among never drinkers, respondents who owned branded merchandise were twice as**  
**27 likely to be susceptible to drinking as those who did not (AOR=1.98, 95% CI: 1.20-3.24,**  
**28  $p=0.007$ ).**

**29 Conclusions:** Young people, above and below the legal purchasing age, are aware of alcohol  
**30 marketing through a range of channels and almost one-in-five own alcohol branded**  
**31 merchandise. In current drinkers, alcohol marketing awareness was associated with increased**  
**32 consumption and greater likelihood of higher-risk consumption. In never drinkers, ownership**  
**33 of branded merchandise was associated with susceptibility.**



**Running head:** Alcohol marketing and consumption in young people in the UK

**Keywords:** Alcohol marketing; Young people; Higher-risk drinking; Alcohol Advertising; Susceptibility; Survey; Public Health; Health Policy.

#### **Strengths and limitations of this study**

- This is the first study to examine awareness of alcohol marketing and ownership of alcohol branded merchandise in a demographically representative sample of young people across the UK, including those above and below the legal purchasing age for alcohol.
- The study provides timely insight into what forms of alcohol marketing young people are aware of, how frequently they recall seeing alcohol marketing, and what factors are associated with higher awareness of alcohol marketing and ownership of alcohol branded merchandise.
- The large sample size supports robust statistical analysis to examine what relationship (if any) there is between alcohol marketing and consumption, controlling for demography and relevant covariates (e.g. peer consumption).
- The study explores the association between alcohol marketing and consumption at three levels: overall alcohol consumption and higher-risk drinking in current drinkers, and susceptibility in never-drinkers.
- The cross-sectional nature of the survey does not enable causal relationships to be drawn about the link between alcohol marketing and either consumption or susceptibility.

**Running head:** Alcohol marketing and consumption in young people in the UK

**1 Awareness of alcohol marketing, ownership of alcohol branded merchandise, and the  
2 association with alcohol consumption, higher-risk drinking, and drinking susceptibility  
3 in adolescents and young adults: A cross-sectional survey in the United Kingdom.**

## 4 5 INTRODUCTION

6 Adolescents and young adults (hereafter ‘young people’, aged 11- 19 years old) are a focal  
7 population for alcohol research because consumption at this stage of development is associated  
8 with increased drinking and risk of concomitant harms in later adulthood [1,2]. Global  
9 estimates indicate that consumption by young people is particularly high in Europe, where the  
10 proportion of current drinkers (69.5%) is higher than the five other global regions, and the  
11 proportion of lifetime abstainers is lower (15.9%) [3]. In England, it is estimated that  
12 approximately half of 11-15-year olds (44%) have consumed an alcoholic drink, one-in-ten  
13 have consumed in the past week, and nine percent have been drunk in the past month [4].  
14 Similar estimates are reported in Scotland and Wales [5,6]. Understanding the drivers of  
15 alcohol consumption in young people is important given the immediate and long-term  
16 individual, social, and economic consequences associated with higher-risk drinking [7].

17 One factor routinely cited as shaping alcohol-related attitudes and behaviours in young  
18 people is marketing [8,9]. Marketing is fundamentally important to alcohol producers. It  
19 represents the primary method of communicating with new and existing consumers, can  
20 directly encourage sales, and can increase brand salience over competitors. Accordingly,  
21 alcohol companies have used highly visible marketing for over 100 years [10], with the current  
22 UK landscape characterised by a complex network of mass media marketing (e.g. television),  
23 alternative marketing (e.g. sponsorship), consumer marketing (e.g. price), and stakeholder  
24 marketing (e.g. to retailers) [9]. The importance of marketing to the alcohol industry is  
25 evidenced through their annual investment, with Diageo’s global marketing expenditure  
26 approximately £1.8 billion [11]. Continued consolidation in the alcohol industry has also seen

**Running head:** Alcohol marketing and consumption in young people in the UK

1  
2  
3 1 the market become dominated by a small number of transnational producers, creating larger  
4  
5 2 marketing budgets, economies of scale, and intense competition [12].  
6

7  
8 3 Content analysis research, which focuses on the marketing output as the unit of analysis,  
9  
10 4 consistently reports that marketing may reach and influence young people. For example,  
11  
12 5 marketing has been reported in media environments where young people may be exposed,  
13  
14 6 including sports [13], social media [14], print media [15], and on-screen [16, 17]. Content  
15  
16 7 research has also found that marketing may appeal to young people through creative designs,  
17  
18 8 use of topical and real-world associations which may resonate with younger audiences, and by  
19  
20 9 promoting positive connotations around consumption (e.g. sociability or desirable lifestyles)  
21  
22 10 [18,19]. It has also been suggested that commercial marketing contains ambiguous messages  
23  
24 11 about lower-risk consumption [20,21].  
25  
26  
27

28  
29 12 Systematic reviews of consumer research, which focus on the individual as the unit of  
30  
31 13 analysis, provide consistent evidence that awareness of, and participation with, marketing has  
32  
33 14 a causal influence on young people's consumption, including initiation and frequency of  
34  
35 15 drinking [22,23]. Qualitative research has also suggested that this relationship is more complex  
36  
37 16 than an 'exposure equals consumption' hypothesis, and that young people consider alcohol  
38  
39 17 marketing and branding to hold rich cultural, social, and symbolic meaning [14,24,25].  
40  
41 18 Accordingly, message interpretation research has attempted to move the debate on from  
42  
43 19 whether marketing is associated with consumption and onto how this influence occurs, by  
44  
45 20 identifying psychological mechanisms which mediate the relationship between exposure and  
46  
47 21 consumption [26,27].  
48  
49

50  
51 22 In the UK, the influence of alcohol marketing on young people has been a topic of debate  
52  
53 23 for decades [9,28]. These debates are further supplemented by concerns about the efficacy and  
54  
55 24 effectiveness of self-regulation, the predominant approach employed to control alcohol  
56  
57 25 marketing in the UK. This includes suggestions that self-regulation provides inadequate  
58  
59  
60

**Running head:** Alcohol marketing and consumption in young people in the UK

1 restrictions, is not consistently enforced or complied with, is retrospective and slow to react to  
2 complaints, lacks meaningful sanctions, and lags behind modern marketing methods [9,28-32].  
3 There are, however, unresolved issues which have inhibited attempts to move the debate  
4 forward. In the UK, the last large-scale assessment of young people's awareness of alcohol  
5 marketing is a decade old, was only conducted in Scotland, only sampled adolescents under  
6 the minimum purchase age, only considered overall marketing awareness (not frequency), and  
7 did not consider higher-risk consumption [33,34].

8 In this study, we explore frequency of awareness for alcohol marketing and ownership of  
9 alcohol branded merchandise in a demographically representative sample of young people in  
10 the UK, including those above and below the legal purchasing age. We also consider what  
11 association (if any) awareness of alcohol marketing and ownership of branded merchandise has  
12 with alcohol consumption and higher-risk drinking in current drinkers, and susceptibility to  
13 drink in never drinkers.

**METHOD****Design and sample**

14  
15  
16  
17 Data come from the 2017 Youth Alcohol Policy Survey, an online cross-sectional survey  
18 conducted with 11-19-year olds in the UK ( $n=3,399$ ). Responses were collected April–May  
19 2017. The survey was hosted by YouGov, a market research company, who recruited a sample  
20 intended to be representative of the UK population from their UK panel [35]. Participants aged  
21 16 or over were approached directly to participate, while those aged under 16 were approached  
22 through existing adult panel members known to have children. A survey weight was provided  
23 for each respondent (based on age, gender, ethnicity, region, and social grade) to enable  
24 descriptive data to be representative of the UK population. The study design was informed by

**Running head:** Alcohol marketing and consumption in young people in the UK

1  
2  
3 1 previous cross-sectional surveys in the UK which have explored young people's experiences  
4  
5 2 of alcohol and tobacco marketing [33,36].  
6  
7  
8 3

**Measures****Demography**

10 4  
11  
12 5  
13  
14 6 Alcohol consumption is not homogeneous among young people in the UK [4-7]. It is therefore  
15  
16 7 important to adjust for demographic variation when examining any factors purported to be  
17  
18 8 associated with consumption. In this study, age, gender, ethnicity, resident country (England,  
19  
20 9 Scotland, Wales, Northern Ireland), living status, employment status, educational status, legal  
21  
22 10 purchasing status for alcohol ( $\geq 18$  years old), and indices of deprivation (IMD), were obtained  
23  
24 11 from information held about panel respondents or survey questions.  
25  
26  
27  
28 12

**Awareness of alcohol marketing**

30 13  
31  
32 14 Awareness of alcohol marketing was assessed through structured, self-reported recall, a method  
33  
34 15 frequently used in consumer research [33]. Participants were prompted with the statement  
35  
36 16 '*Over the last month, how often, if at all, have you seen...*' and then presented with descriptions  
37  
38 17 of nine examples of alcohol marketing: (1) newspapers or magazines; (2) television; (3)  
39  
40 18 billboards; (4) radio; (5) adverts on social media (e.g. YouTube, Tumblr, Facebook, SnapChat,  
41  
42 19 Instagram or other social media); (6) famous people in films, music videos or TV or pictured  
43  
44 20 in magazines with alcohol [celebrity endorsement]; (7) sports, games, or events sponsorship;  
45  
46 21 (8) special price offers; and (9) competitions or prize draws. As per recent research [37,38], a  
47  
48 22 Likert scale was used to measure frequency of noticing marketing in the past month for each  
49  
50 23 of the nine examples (1=Everyday – 6=Not in the past month; Not sure).  
51  
52  
53  
54  
55

56 24 In the UK, survey research which has measured awareness of alcohol marketing has  
57  
58 25 typically used dichotomous response options for each channel (e.g. Yes/No) and used a  
59  
60

**Running head:** Alcohol marketing and consumption in young people in the UK

1 summation across these to estimate overall awareness. [33,39]. This method, however, only  
2 provides insight into breadth of marketing awareness across channels, not frequency or volume,  
3 and therefore lacks sensitivity and may underestimate awareness. To enhance accuracy in this  
4 study, the self-reported frequency of awareness for each marketing example was converted into  
5 the estimated number of days that marketing had been seen in a four-week period (i.e. 'one  
6 month'). This timeframe is consistent with previous research [40,41] and is representative of  
7 the minimum number of days in any month. For example, an answer of 'everyday' equated to  
8 28 instances of awareness over four weeks (i.e. seven days per-week multiplied by four) and  
9 1-2 times per-week equated to six instances over four weeks (i.e. 1.5 times per-week multiplied  
10 by four) (see Table 1 for other response options). Scores across the nine channels were summed  
11 to create an aggregate score, providing an approximation of total alcohol marketing awareness  
12 in the past month. Estimating total volume of awareness, as opposed to breadth across channels,  
13 is consistent with other recent alcohol marketing research [42,43].

14 In this study, an aggregate awareness score was only computed when a valid answer  
15 had been given for all nine marketing examples. To provide meaningful interpretative utility,  
16 the aggregate score for the valid sample was split into tertiles of low (aggregate score  $\leq 16$ ;  
17 awareness approximately every other day), medium (17-53; awareness approximately daily),  
18 and high awareness ( $\geq 54$ ; awareness almost twice daily). If a participant answered 'not sure'  
19 to any of the nine channels they were coded as 'not stated' for the aggregate score. Indicating  
20 'not sure' meant that a respondent's potential aggregate score was, by default, more  
21 conservative than those who provided a valid answer to all nine examples. These respondents  
22 were therefore coded as a separate 'not sure' category to avoid biasing the proportion of valid  
23 respondents considered to have low or medium awareness, or what the tertiles boundaries were.

**Ownership of alcohol brand merchandise**

**Running head:** Alcohol marketing and consumption in young people in the UK

1  
2  
3 1 Ownership of alcohol branded merchandise was measured through a single item adapted from  
4  
5 2 previous research [33,44]. Participants were asked '*Do you own any merchandise (such as*  
6  
7 3 *clothing or drinks glasses) that show an alcoholic drink brand or logo?*' (Yes/No/Not sure).  
8  
9 4

**Alcohol consumption status**

10  
11  
12 5  
13  
14 6 Participants were asked '*Have you ever had a whole alcoholic drink? Not just a sip?*' [33,34].  
15  
16  
17 7 Those who answered 'No' were classed as never-drinkers while those who answered 'Yes'  
18  
19 8 were classed as ever-drinkers.  
20  
21 9

**Alcohol consumption and higher-risk drinking**

22  
23  
24 10  
25  
26 11 Alcohol use was measured through the Alcohol Use Disorders Identification Test–  
27  
28 12 Consumption (AUDIT-C), which assessed frequency of consumption, units drunk in a typical  
29  
30 13 drinking occasion, and frequency of heavy episodic drinking. Responses were provided on  
31  
32 14 five-point scales, with the answers for each item relative to frequency (0=Never – 4= Four or  
33  
34 15 more times a week), units drunk (0=1-2 units – 4=10 units or more), or frequency of heavy  
35  
36 16 episodic drinking (0=Never – 4=Daily or almost Daily). Heavy episodic drinking was classified  
37  
38 17 as eight or more units in a single occasion for males, and six or more units for females (one  
39  
40 18 unit=8g or 10ml of alcohol). A diagram depicting the unit content of alcoholic drinks was  
41  
42 19 included to assist calculation of units. Those who answered anything other than 'never' on the  
43  
44 20 first AUDIT-C item were classed as current drinkers and asked to complete the final two items.  
45  
46 21 All other respondents (i.e. those stating 'never' for frequency of consumption) were classified  
47  
48 22 as non-drinkers and were not asked to complete the final two items. In current drinkers, a total  
49  
50 23 AUDIT-C score was computed by summing the three AUDIT-C items (0-12), with a cut-off of  
51  
52 24  $\geq 5$  used to identify higher-risk consumption [45].  
53  
54  
55  
56  
57  
58  
59  
60

**Running head:** Alcohol marketing and consumption in young people in the UK

## 1 Susceptibility

2 As per tobacco research, susceptibility was defined as the absence of a firm decision not to  
3 drink alcohol in the next year [36]. Never-drinkers were classified as ‘non-susceptible’ if they  
4 answered ‘definitely no’ to the question ‘*Do you think you will drink alcohol at any time during*  
5 *the next year?*’ Those who answered anything other than ‘Definitely no’ were classified as  
6 Susceptible.

## 8 Confounding variables

9 Confounding factors, reported to influence consumption in young people and used in previous  
10 alcohol marketing research, were included as covariates to contextualise any association  
11 between marketing and consumption [33,34,46,47]. Frequency of consumption was measured  
12 for the mother (female carer), father (male carer), and closest friend (each scored: 1=Never –  
13 9=Every day or almost every day; Prefer not to say; Not applicable). For all three groups,  
14 consumption was collapsed into five categories (Never, Less than monthly, Monthly or  
15 Fortnightly, At Least weekly, and Not Stated). Perceived acceptability of consumption was  
16 measured for parents and peers (each scored: 1=Total acceptable – 5=Totally unacceptable).  
17 For both groups, acceptability was converted into dichotomous categories (‘Neutral or  
18 unacceptable’ and ‘Acceptable’). For ever drinkers, age of first drink was also measured ( $\leq 8$   
19 years old – 19 years old; Can’t remember; Prefer not to say). Answers were converted into  
20 three categories ( $\leq 13$  years; 14-15 years;  $\geq 16$  years).

## 22 Ethics

23 Ethical approval was obtained from the University of Stirling’s General University Ethics  
24 Panel (GUEP59). YouGov included a lead for ethical and quality assurance, including consent,



**Running head:** Alcohol marketing and consumption in young people in the UK

1  
2  
3 1 post-survey debriefing and signposting to support organisations, and confidentiality and  
4  
5 2 anonymity.

3

**4 Patient and Public Involvement**

5 The survey was developed following cognitive testing with a small sample ( $n=100$ ) of young  
6 people to ensure age and cultural comprehension of the questions. Beyond this, no other patient  
7 or public involvement was undertaken.

8

**9 Analysis**

10 Data were analysed using SPSS version 23 (SPSS Inc., Chicago IL). Descriptive data were  
11 weighted so that percentages and median scores were representative of the demographic profile  
12 of the UK population. Bivariate analyses, using Chi-square tests, examined differences in level  
13 of alcohol marketing awareness and ownership of branded merchandise between the  
14 demographic and confounding variables.

15 A multivariate linear regression was conducted with current drinkers' AUDIT-C score  
16 as the dependent variable (0-12) and awareness of marketing and ownership of branded  
17 merchandise as the key independent variables. The following demographic and confounding  
18 variables were also included in initial blocks: age; gender; ethnicity; IMD quintile; resident  
19 country; educational status; working status; living status; frequency of mother (female carer),  
20 father (male carer) and close friend drinking; perceived parental and peer acceptability of  
21 consumption; and drink age of first drink. Categorical variables with  $\geq 3$  categories were  
22 converted into dummy (binary) variables to aid interpretation and comparison. The omitted  
23 dummy variable formed the reference category. For example, marketing awareness was a  
24 categorical variable with four levels: low, medium, high, and not stated. Four binary variables  
25 were computed: low awareness, medium awareness, high awareness, and not stated (each

**Running head:** Alcohol marketing and consumption in young people in the UK

1 coded Yes=1, No=0). By including medium, high and not stated in the multivariate analysis,  
2 and omitting low awareness, the reference category was low awareness. The multivariate  
3 regressions therefore indicate the association between level of consumption and medium  
4 awareness, relative to low awareness, and high awareness relative to low awareness. Reference  
5 categories for each variable are displayed in the results.

6 Two multivariate logistic regressions were conducted with higher-risk drinking  
7 (AUDIT-C  $\geq 5$ ) among current drinkers and susceptibility to drink among never-drinkers as the  
8 dependent variables. Marketing awareness and ownership of branded merchandise were the  
9 key independent variables. Where applicable, both logistic regressions controlled for the same  
10 demographic and confounding variables as the linear regression. Reference categories for  
11 categorical independent variables are indicated in the results. Where the categorical variables  
12 had three  $\geq 3$  levels, and were of an ordinal level, the SPSS contrast=difference function enabled  
13 comparison of each increasing category relative to the combined previous categories. For  
14 example, the first comparison with frequency of mother's drinking and higher-risk drinking  
15 was 'less than monthly drinking' vs. 'mother never drinks', whereas the final comparison was  
16 'at least weekly drinking' vs. 'less often'. As the independent variables were categorical, 'not  
17 stated' responses were also included as a separate category and compared against the reference  
18 category for each variable. This enabled the maximum sample to be retained. For example, the  
19 large number of 'not stated' responses on level of marketing awareness could be compared  
20 with those for whom marketing awareness could be computed.

21 All multivariate analyses were conducted on unweighted data as the factors used to  
22 construct the weights were included as covariates in the models. The multivariate analyses were  
23 repeated on weighted data to check for consistency. As results for the key independent variables  
24 (marketing awareness and ownership of branded merchandise) were consistent, only the  
25 unweighted results are presented.

**Running head:** Alcohol marketing and consumption in young people in the UK

1  
2  
3 1  
4  
5  
6 2

## **RESULTS**

### **Sample characteristics**

7 3  
8  
9  
10 4 The weighted sample ( $n=3,399$ ) had an average age of 15.18 years old ( $SD=2.55$ ; range: 11-  
11  
12 5 19), with three quarters (76%) below the legal purchasing age ( $\leq 18$  years). There was an even  
13  
14 6 distribution for gender (51% male and 49% female). The majority of the sample were White  
15  
16 7 British (76%) and were evenly distributed across IMD (20% in each quintile). Most participants  
17  
18 8 lived in England (84%) with the remainder from Scotland (8%), Wales (5%), and Northern  
19  
20 9 Ireland (3%). Almost all participants were living at home with parent(s) or other adult family  
21  
22 10 members (90%) and were in some form of education (95%).  
23  
24  
25  
26 11

### **Alcohol consumption and susceptibility**

27  
28 12  
29  
30 13 After excluding cases with missing data on drinking status ( $n=62$ , weighted), almost half of the  
31  
32 14 weighted sample (48%;  $n=1,590$ ) were current drinkers. Within current drinkers, the average  
33  
34 15 AUDIT-C score was 4.33 ( $SD=2.77$ ). Almost half of current drinkers (44%;  $n=707$ ) were  
35  
36 16 classified as higher-risk ( $\geq 5$  AUDIT-C). After excluding cases with missing data on drinking  
37  
38 17 status ( $n=62$ , weighted), almost half of the weighted sample (49%;  $n=1,623$ ) were never  
39  
40 18 drinkers. Within never drinkers, half were classified as susceptible (52%;  $n=841$ ).  
41  
42  
43  
44 19

### **Awareness of alcohol marketing**

45  
46 20  
47  
48 21 The most frequent sources of marketing awareness in the past month were adverts on television  
49  
50 22 (Median 6 instances per month, Inter quartile range=14), celebrity endorsement (Median 6,  
51  
52 23 IQR=14), and special offers (Median 6, IQR=14) (Table 1). More than a third of respondents  
53  
54 24 (range: 39-43%) had noticed marketing through these channels at least weekly. Billboard  
55  
56 25 adverts (Median 2 instances per month, IQR=6), sponsorship (Median 2, IQR=6), and social  
57  
58  
59  
60

**Running head:** Alcohol marketing and consumption in young people in the UK

1 media adverts (Median 2, IQR = 6) were noticed less than once a week, with at least a quarter  
2 of participants (range: 27-31%) having noticed these at least weekly. Lowest awareness was  
3 for adverts in the print press (Median 0 instances per month, IQR=6), on radio (Median 0, IQR  
4 = 0), and competitions (Median 0, IQR=2). For each marketing example, a fifth or more (range:  
5 19-29%) were not sure how often, if at all, they had come across alcohol marketing. Overall,  
6 82% had noticed marketing through at least one channel.

7  
8 [TABLE 1]  
9

**Aggregate alcohol marketing awareness**

10 The median aggregate alcohol marketing awareness score was 32 (IQR=60), equating to  
11 noticing 32 instances of alcohol marketing in the past month (under minimum purchase age:  
12 median=28; IQR=60). When categorised into tertiles, 35% of the valid sample were classified  
13 as having low awareness ( $\leq 16$  instances per month), 32% had medium awareness (17–53), and  
14 34% had high awareness ( $\geq 54$ ). In those under the minimum purchase age, 38% had low  
15 awareness, 31% medium, and 32% high.

16 Bivariate Chi-square tests found that higher awareness of alcohol marketing was  
17 significantly associated with being male, of legal purchasing age, a current drinker, a higher-  
18 risk drinker, not in education, in employment, and perceiving that parents and peers would  
19 consider it okay to consume (Table 2). Higher awareness was also associated with greater  
20 frequency of mother (female carer) consumption,  $\chi^2(16)=38.25, p<0.001$ , greater frequency of  
21 father (male carer) consumption,  $\chi^2(16)=29.55, p<0.05$ , and greater frequency of close friends  
22 drinking,  $\chi^2(16)=198.51, p<0.001$ . There was no difference in awareness by ethnicity, IMD  
23 quintile, or resident country.  
24  
25

**Running head:** Alcohol marketing and consumption in young people in the UK1  
2  
3 [TABLE 2]  
45  
6 27  
8 **Owning alcohol branded merchandise**  
9

10 Almost a fifth of participants (17%) reported owning alcohol branded merchandise. Bivariate  
11 Chi-square tests found that ownership of branded merchandise was significantly associated  
12 with being of white British ethnicity, of legal purchase age, a current drinker, a higher-risk  
13 drinker, not in education, in employment, and perceiving that parents and peers would consider  
14 it okay to consume (Table 3). Ownership of branded merchandise was also associated with  
15 greater frequency of mother (female carer) consumption,  $\chi^2(8)=44.11$ ,  $p<0.001$ , greater  
16 frequency of father (male carer) consumption,  $\chi^2(8)=56.49$ ,  $p<0.001$ , and greater frequency of  
17 close friends drinking,  $\chi^2(8)=178.76$ ,  $p<0.001$ . There was also an overall effect of IMD,  
18  $\chi^2(4)=15.73$ ,  $p<0.01$ , although this had no distinct pattern across escalating deprivation. There  
19 was no difference by resident country or gender.  
20  
21  
22  
23  
24  
25  
26  
27  
28  
29  
30  
31  
32  
33  
34

35 [TABLE 3]  
36  
37  
38  
3940 **Association between alcohol marketing and AUDIT-C scoring**  
41

42 A multivariate linear regression examined the association between marketing awareness,  
43 ownership of branded merchandise, and AUDIT-C scoring in current drinkers (Table 4). After  
44 controlling for demographic and confounding factors, medium alcohol marketing awareness  
45 ( $b=0.79$ , 95% CI: 0.37-1.21,  $p<0.001$ ), or high awareness ( $b=0.85$ , 95% CI: 0.44-1.26,  
46  $p<0.001$ ), compared to low awareness, was associated with higher AUDIT-C score, as was  
47 ownership of branded merchandise ( $b=0.79$ , 95% CI: 0.55-1.04,  $p<0.001$ ). Of the demographic  
48 variables, being older ( $p<0.001$ ), male ( $p=0.006$ ), from a more affluent IMD ( $p<0.01$ ), in  
49 education ( $p<0.01$ ), and living independently of parents or adult family members ( $p<0.001$ )  
50  
51  
52  
53  
54  
55  
56  
57  
58  
59  
60

**Running head:** Alcohol marketing and consumption in young people in the UK

1 was also associated with higher AUDIT-C score in the final model. Of the confounding variables, having a close friend who drinks at least weekly ( $p<0.001$ ), and perceiving that parents consider it acceptable to consume ( $p<0.05$ ) was also associated with higher AUDIT-C score. Having a first alcoholic drink at  $\geq 16$  years old ( $p<0.001$ ) was associated with lower AUDIT-C score, compared with those who first drank aged 14–15 years.

[TABLE 4]

**Association between alcohol marketing and higher-risk consumption**

A multivariate logistic regression examined the association between marketing awareness, ownership of branded merchandise, and higher-risk drinking in current drinkers (Table 5). After controlling for demographic and confounding factors, medium alcohol marketing awareness (Adjusted Odds Ratio=2.18, 95% CI: 1.39-3.42,  $p<0.001$ ), high awareness (AOR=1.43, 95% CI: 1.01-2.02,  $p<0.05$ ), and owning branded merchandise (AOR=1.71, 95% CI: 1.31-2.22,  $p<0.001$ ) were associated with higher-risk drinking. Of the demographic variables, being older ( $p<0.001$ ), male ( $p<0.05$ ), from England compared to Wales ( $p<0.05$ ), in education ( $p<0.05$ ), and living independently ( $p<0.05$ ) was associated with higher-risk drinking in the final model. Of the confounding variables, increasing frequency of close friend consumption ( $p<0.001$ ), and having had first drink aged 14-15 years old or younger ( $p<0.001$ ), was associated with higher-risk consumption.

[TABLE 5]

**Association between alcohol marketing and susceptibility to consume**

**Running head:** Alcohol marketing and consumption in young people in the UK

1 A multivariate logistic regression examined the association between marketing awareness,  
2 ownership of branded merchandise, and susceptibility to drink in never drinkers (Table 6).  
3 After controlling for demographic and confounding variables, awareness of alcohol marketing  
4 was not associated with susceptibility, but ownership of branded merchandise was, with those  
5 who owned branded merchandise almost twice as likely to be susceptible compared to those  
6 who did not (AOR=1.98, 95% CI: 1.20-3.24,  $p<0.01$ ). Of the demographic variables, only  
7 being white British ( $p<0.01$ ) was associated with susceptibility in the final model. Of the  
8 confounding variables, frequency of mother (female carer) consumption ( $p<0.001$ ), frequency  
9 of father (male carer) consumption ( $p<0.05$ ), frequency of close friend consumption ( $p<0.001$ ),  
10 and perceived peer approval ( $p<0.001$ ) were associated with susceptibility.

11  
12 [TABLE 6]

**DISCUSSION**

15 The findings indicate that young people in the UK are aware of a variety of alcohol marketing  
16 and almost a fifth own branded merchandise. The results also show that awareness of marketing  
17 and ownership of branded merchandise is associated with increased consumption and higher-  
18 risk drinking in current drinkers, and that ownership of branded merchandise is associated with  
19 susceptibility in never-drinkers. We address key evidence gaps in the UK by exploring  
20 frequency of marketing awareness (not just breadth of exposure) and demonstrating an  
21 association between marketing and both consumption and susceptibility in young people above  
22 and below the legal purchasing age from across the UK.

23 The findings are consistent with suggestions that alcohol marketing appears in contexts  
24 which may reach young people, including those under the legal purchasing age [8,9].  
25 Awareness included mass media marketing (e.g. television), alternative marketing (e.g.



**Running head:** Alcohol marketing and consumption in young people in the UK

1 sponsorship and celebrity endorsement), consumer marketing (e.g. price offers), and digital  
2 media. This highlights the dynamic nature of ‘360-degree’ marketing strategies and how they  
3 reach young people in offline and online environments [9,48]. The results extend understanding  
4 by showing how frequently young people see alcohol marketing; with at least one-in-ten  
5 reporting daily or almost daily awareness through three of the nine marketing examples.  
6 Approximately half of the sample had seen at least 32 instances of alcohol marketing per  
7 month, which equates to awareness at least once a day. Although there were expected  
8 differences in awareness between drinkers and never-drinkers [33,49], there were no  
9 differences between key demographic groups, including ethnicity, indices of deprivation, and  
10 resident country. This suggests that awareness of alcohol marketing occurs in young people  
11 across the UK, and is not isolated to a minority of demographic groups.

12 The results are consistent with longitudinal research which has shown a link between  
13 marketing and increased consumption in young people [22,23,34,38]. Although marketing  
14 awareness did not have an association with susceptibility in never-drinkers, ownership of  
15 branded merchandise did. Research has reported that participation with marketing has a  
16 stronger association with consumption than awareness [33,34,39,49]. Our findings therefore  
17 suggest that the effect of participation is pronounced in never-drinkers. Nevertheless, as  
18 research suggests that not all alcohol marketing or brands are equally appealing to youth  
19 [25,50], it is possible that focusing on aggregated alcohol marketing awareness (the approach  
20 in this study) may have disguised associations between individual examples of marketing and  
21 susceptibility in never drinkers. The findings also extend understanding by showing an  
22 association between marketing and consumption across young adulthood. This includes an  
23 association with susceptibility and consumption in young people under the legal purchasing  
24 age and higher-risk drinking in newly-legal drinkers. Newly legal drinkers are an important  
25 target for alcohol marketers [18] and are a key under-researched group [51]. The findings



**Running head:** Alcohol marketing and consumption in young people in the UK

1 therefore highlight the importance of considering the wider role that marketing plays on  
2 consumption, not just in those under the purchasing age.

3       Except for the Scottish Government's decision to implement minimum unit pricing  
4 [52], there has been little recent change to the UK's self-and-co-regulatory framework for  
5 alcohol marketing [53,54]. It is claimed that such self-regulatory approaches provide  
6 inadequate restrictions, are not suitably enforced, are retrospective and slow to react to  
7 complaints, and lack meaningful sanctions [9,28-32]. Although statutory regulations are cited  
8 as an alternative approach [28], studies have also questioned whether current examples, such  
9 as the Loi Évin in France, are being enforced properly or whether they reduce marketing  
10 exposure [13,37]. Further research exploring the perspectives of stakeholders involved in the  
11 production, research, consumption, and regulation of marketing would be of value to identify  
12 feasible and effective options to reduce youth exposure and form a consensus on appropriate  
13 action [55,56].

14       There are limitations. First, the cross-sectional design cannot identify a causal  
15 relationship between marketing and consumption, albeit a directional effect is supported by  
16 longitudinal research [22,23]. Moreover, that marketing had any association with consumption  
17 and susceptibility at all suggests that it must at least play either an initiating or reinforcing role.  
18 Second, the results are only partially representative of young adults above the legal purchasing  
19 age, albeit other research has shown similar trends in older young adults [39]. Third, the  
20 marketing channels measured are not exhaustive and, consequently, the results may  
21 underestimate awareness. Examples of omitted marketing include packaging, cinema, product  
22 placement, and a broader range of digital marketing [33,39,49]. It was also not possible to  
23 decipher whether 'not sure' responses indicated uncertainty over whether a participant had seen  
24 alcohol marketed at all through a channel or uncertainty on the frequency of awareness. This  
25 influenced the design of the regression models (to account for a 'Not sure' category). Third,

**Running head:** Alcohol marketing and consumption in young people in the UK

1  
2  
3 1 except for owning branded merchandise, the study only measured awareness of marketing, but  
4  
5 2 not participation. As participation is reported to have a stronger effect [34,49], the results may  
6  
7 3 underestimate the association between marketing and drinking outcomes. Finally,  
8  
9 4 measurement of owning branded merchandise also only included two examples as prompts  
10  
11 5 (clothing and drinks glasses). It is possible that different prompts may have altered recall, and  
12  
13 6 that multiple items or a free text response option would have provided greater clarity on  
14  
15 7 merchandise owned.  
16  
17  
18  
19  
20  
21  
22

**CONCLUSION**

23  
24 10 This paper makes important contributions to understanding by exploring awareness of alcohol  
25  
26 11 marketing and ownership of branded merchandise by young people from across the UK, three  
27  
28 12 quarters of who were under the legal purchasing age. The results highlight that ‘360-degree’  
29  
30 13 marketing strategies have created several avenues for young people to be exposed to, or  
31  
32 14 involved with, alcohol marketing, and that this is associated with consumption and higher-risk  
33  
34 15 drinking in current drinkers and susceptibility in never drinkers. Further scrutiny and  
35  
36 16 examination of the UK’s self-regulatory approach, and viable alternatives, is needed to identify  
37  
38 17 feasible, appropriate, and effective means of reducing marketing exposure in young people.  
39  
40  
41  
42  
43  
44  
45

46  
47 19 **Author contribution statement:** LH, CT, and JV led on study design and data acquisition.  
48  
49 20 LH, CT, JV were involved in design of the study tools with support from AMM. NC and AMM  
50  
51 21 planned the analysis, and this was conducted by AMM. NC and AMM led on interpretation of  
52  
53 22 the results, with input from LH, CT, and JV. NC drafted the manuscript, with support from  
54  
55 23 AMM on methods and results, and all authors provided feedback and approved the final version  
56  
57 24 of the manuscript.  
58  
59  
60

**Running head:** Alcohol marketing and consumption in young people in the UK

1  
2  
3 1 **Acknowledgements:** The authors thank YouGov for their assistance in preparing and  
4  
5 2 managing delivery of the survey and data. We thank Gillian Rosenberg from the CPRC at  
6  
7 3 Cancer Research UK for her role in managing the project and providing information on  
8  
9 4 YouGov fieldwork. We also thank NatCen Social Research for their contribution to the original  
10  
11 5 scoping studies used in the development of this project.  
12  
13  
14  
15 6

16  
17 7 **Funding:** This work was supported by a grant from Cancer Research UK (1107098).  
18  
19 8

20  
21 9 **Declaration of interest:** Nathan Critchlow is a board member of Alcohol Focus Scotland. All  
22  
23 10 other authors have no conflict of interest to declare.  
24  
25  
26 11

27  
28 12 **Data sharing statement:** No additional data are available.  
29  
30  
31 13  
32  
33  
34  
35  
36  
37  
38  
39  
40  
41  
42  
43  
44  
45  
46  
47  
48  
49  
50  
51  
52  
53  
54  
55  
56  
57  
58  
59  
60

**Running head:** Alcohol marketing and consumption in young people in the UK

## 1 REFERENCES

- 1 1. Newbury-Birch D, Walker J, Avery L, *et al.* *Impact of alcohol consumption on young*  
2 *people: A systematic review of published reviews*, London: Department for Children,  
3 Schools and Family, 2009.
- 4 2. McCambridge J, McAlaney K, Rowe R. Adult consequences of late adolescent alcohol  
5 consumption: A systematic review of cohort studies. *PloS Medicine*  
6 2011;8(2):e1000413.
- 7 3. World Health Organisation. *Global status report on alcohol and health 2014*. Geneva:  
8 World Health Organisation, 2014.
- 9 4. National Health Service Digital. *Smoking, drinking, and drug use among young people:*  
10 *England, 2016*. London: Health and Social Care Information Service, 2017.
- 11 5. Public Health Wales Observatory. *Alcohol and health in Wales 2014: Wales profile*.  
12 Cardiff: Public Health Wales Observatory, 2014.
- 13 6. Scottish Government. *Scottish Schools Adolescent Lifestyle and Substance Use Survey*  
14 *(SALSUS): Alcohol report (2015)*. Edinburgh: Scottish Government, 2016.
- 15 7. Public Health England. *The public health burden of alcohol and the effectiveness and*  
16 *cost-effectiveness of alcohol control policies: An evidence review*. London: Public  
17 Health England, 2016.
- 18 8. Hastings G. Alcohol marketing: Grooming the next generation. *BMJ*;346:f1227.
- 19 9. Alcohol Focus Scotland. Alcohol Focus Scotland. Glasgow: Alcohol Focus Scotland,  
20 2017.
- 21 10. Dade P. *Drink talking: 100 years of alcohol advertising*, Middlesex: Middlesex  
22 University Press, 2008.
- 23 11. Diageo. *Annual report, 2017*. London: Diageo PLC, 2017.

**Running head:** Alcohol marketing and consumption in young people in the UK

12. Collin J, Hill SE, Smith KE. Merging alcohol giants threaten global health. *BMJ* 2015;17(351):h6087.
13. Purves, RI, Critchlow N, Stead M *et al.* Alcohol marketing during the UEFA EURO 2016 football tournament: A frequency analysis. *Int J Environ Res Public Health* 2017;14(7):e704.
14. Atkinson AM, Ross-Houle KM, Begley E, *et al.* An exploration of alcohol advertising on social networking sites: An analysis of content, interactions and young people's perspectives. *Add Res Theory* 2016;25(2)91-102.
15. King C, Sigel M, Ross CS, *et al.* Alcohol advertising in magazines and underage readership: Are underage youth disproportionality exposed? *Alcohol: Clin Exp Res* 2017;41(1):1775-1782.
16. Thompson KM. Addiction media: Substances on screen. *Child Adolesc Psychiatr Clin N Am* 2005;14:473-489.
17. Lowe E, Britton J, Cranwell J. Alcohol content in the 'hyper reality' MTV show 'Geordie Shore'. *Alcohol Alcohol* 2018;53(1):337-343.
18. Hastings G, Brooks O, Stead M, *et al.* "They'll drink bucket loads of the stuff": An analysis of internal alcohol industry advertising documents. London: Alcohol Education Research Council, 2010.
19. Rhoades E, Jernigan DH. Risky messages in alcohol advertising, 2003-2007: results from content analysis. *J Adolesc Health* 2013;52(1):1116-121.
20. Jones, SC, Hall S, Kypri K. Should I drink responsibly, safely or properly? Confusing messages about reducing alcohol-related harm. *PLoS One* 2017;12(9):e0184705.
21. Smith SW, Atkin CK, Roznowski J. Are "drink responsibly" alcohol campaigns strategically ambiguous? *Health Commun.* 2006;20(1):1-11.

**Running head:** Alcohol marketing and consumption in young people in the UK

- 1  
2  
3 1 22. Anderson P, de Bruijn A, Angus K, *et al.* Impact of alcohol advertising and media  
4 exposure on adolescent alcohol use: A systematic review of longitudinal studies.  
5  
6 2  
7  
8 3  
9  
10 4 23. Jernigan DH, Noel J, Landon J, *et al.* Alcohol marketing and youth alcohol  
11 consumption: A systematic review of longitudinal studies published since 2008.  
12  
13 5  
14 6  
15 6  
16  
17 7 24. Morey Y, Eadie D, Purves RI, *et al.* *Youth engagement with alcohol brands in the UK,*  
18 London: Cancer Research UK, 2017.  
19  
20 8  
21 9 25. Purves RI, Stead M, Eadie D. “I wouldn’t be friends with some if they were liking too  
22 much rubbish”: A qualitative study of alcohol brands, youth identify, and social media.  
23  
24 10  
25  
26 11  
27  
28 12 26. Austin EW, Knaus C. Predicting the potential for risky behaviour among those “too  
29 young” to drink as the result of appealing advertising. *J Health Commun.* 2000;5(1):13-  
30  
31 13  
32  
33 14  
34  
35 15 27. McClure AC, Stoolmiller M, Tanski SE, *et al.* Alcohol marketing receptivity,  
36 marketing-specific cognitions and underage binge drinking. *Alcohol Clin Exp Res*  
37  
38 16  
39  
40 17  
41  
42 18 28. Alcohol Health Alliance. *Health First: An evidence-based alcohol strategy for the UK.*  
43 Stirling: University of Stirling, 2013.  
44  
45 19  
46  
47 20 29. Noel JK, Babor TF, Does industry self-regulation protect young from exposure to  
48 alcohol marketing? A review of compliance and compliant studies. *Addiction*  
49  
50 21  
51 22  
52 22  
53  
54 23 30. Noel JK, Babor TF, Robaina K. Industry self-regulation of alcohol marketing: A  
55 systematic review of content and exposure research. *Addiction* 2017; 112(S1):28-50.  
56  
57  
58  
59  
60

**Running head:** Alcohol marketing and consumption in young people in the UK

- 1 31. Alcohol Concern and Alcohol Research UK. *Fit for purpose?* An analysis of the role  
2 of the Portman Group in alcohol industry self-regulation. London: Alcohol Concern  
3 and Alcohol Research UK, 2018.
- 4 32. Hastings G, Brooks O, Stead M, *et al.* (2010). Failure of self-regulation of UK alcohol  
5 advertising. *BMJ* 2010;340:b5650.
- 6 33. Gordon R, Harris F, MacKintosh AM, *et al.* Assessing the cumulative impact of alcohol  
7 marketing on young people's drinking: Cross-sectional data findings. *Addict Res*  
8 *Theory* 2011;19(1):66-75.
- 9 34. Gordon R., MacKintosh AM., Moodie C. The impact of alcohol marketing on youth  
10 drinking behaviour: A two stage cohort study. *Alcohol Alcohol* 2010;45(5):470-480.
- 11 35. YouGov. *Panel methodology*. Available from: [https://yougov.co.uk/about/panel-](https://yougov.co.uk/about/panel-methodology/)  
12 [methodology/](https://yougov.co.uk/about/panel-methodology/) [accessed 6<sup>th</sup> June 2018].
- 13 36. Ford A, MacKintosh AM, Moodie C, *et al.* Cigarette pack design and adolescent  
14 smoking susceptibility: a cross-sectional survey. *BMJ Open* 2013;3:e003282.
- 15 37. Gallopel-Morvan K, Spilka S, Mutatayi C, *et al.* France's Évin law on the control of  
16 alcohol advertising: Content, effectiveness, and limitations. *Addiction*  
17 2017;112(S1):86-93.
- 18 38. de Bruijn A, Tanghe J, de Leeuw R, *et al.* European longitudinal study on the  
19 relationship between adolescents' alcohol marketing exposure and alcohol use.  
20 *Addiction* 2016;111(10):17774-1783.
- 21 39. Critchlow N, Moodie C, Bauld L, *et al.* Awareness of, and participation with, digital  
22 alcohol marketing, and the association with frequency of high episodic drinking among  
23 young adults. *Drugs* 2016;23(4):328-336.
- 24 40. Synder LB, Fleming F, Slater M, *et al.* Effects of alcohol advertising exposure on  
25 drinking among youth. *Arch Pediatr Adolesc Med.* 2006;160(1):18-24.

**Running head:** Alcohol marketing and consumption in young people in the UK

- 1  
2  
3 1 41. Siegel M, Kurland RP, Castrini M, *et al.* Potential youth exposure to alcohol advertising  
4  
5 2 on the internet: A study of internet version of popular television programmes. *J Subs*  
6  
7 3 *Use* 2016;21(4): 361-367.  
8  
9  
10 4 42. Collins RL, Martino SC, Kovalchik SA, *et al.* Alcohol advertising exposure among  
11  
12 5 middle school-age youth: An assessment across all media and venues. *J Stud Alcohol*  
13  
14 6 *Drugs* 2016;77(3):384-392.  
15  
16  
17 7 43. Chambers T, Stanley J, Signal L, *et al.* Quantifying the nature and extent of children's  
18  
19 8 real-time exposure to alcohol marketing in their everyday lives using wearable cameras:  
20  
21 9 Children's exposure via a range of media in a range of key places. *Alcohol Alcohol*  
22  
23 10 2018;53(5):626-633.  
24  
25  
26 11 44. Jones SC. Alcohol-branded merchandise ownership and drinking. *Pediatrics*  
27  
28 12 2016;137(5):1-12.  
29  
30  
31 13 45. Research in Practice. *Scoring standardised measures – All measures and guidance.*  
32  
33 14 Available from: [https://www.rip.org.uk/resources/publications/practice-tools-and-](https://www.rip.org.uk/resources/publications/practice-tools-and-guides/scoring-standardised-measures--all-measures-and-guidance-compilation-2015/)  
34  
35 15 [guides/scoring-standardised-measures--all-measures-and-guidance-compilation-2015/](https://www.rip.org.uk/resources/publications/practice-tools-and-guides/scoring-standardised-measures--all-measures-and-guidance-compilation-2015/)  
36  
37 16 [accessed 6<sup>th</sup> June 2018].  
38  
39  
40 17 46. Rossow I, Keating P, Felix L, McCambridge J. Does parental drinking influence  
41  
42 18 children's drinking? A systematic review of prospective cohort studies. *Addiction*  
43  
44 19 2016;111(2):204-217.  
45  
46  
47 20 47. Leung RK, Toumbourou JW, Hemphill SA. The effect of peer influence and selection  
48  
49 21 processes on adolescent alcohol use: A systematic review of longitudinal studies.  
50  
51 22 *Health Psychol Rev* 2014;8(4):426-457.  
52  
53  
54 23 48. Chester J, Montgomery K, Dorfman L. *Alcohol marketing in the digital age.* Berkley,  
55  
56 24 CA: Berkley Media Studies Group, 2010.  
57  
58  
59  
60



**Running head:** Alcohol marketing and consumption in young people in the UK

- 1  
2  
3 1 49. Lin E-Y, Casswell S, You RQ, Huckle T. Engagement with alcohol marketing and early  
4 brand allegiance in relation to early years of drinking. *Addict Res Theory*  
5 2  
6 brand allegiance in relation to early years of drinking. *Addict Res Theory*  
7 3  
8 2012;20(4):329-338.  
9  
10 4 50. Padon AA, Rimal, DeJong W, *et al.* Assessing youth-appealing content in alcohol  
11 advertisements: Application of a content appealing to youth (CAY) index. *Health*  
12 5  
13 advertisements: Application of a content appealing to youth (CAY) index. *Health*  
14 6  
15 *Commun.* 2018;32(2):164-173.  
16  
17 7 51. Meier PS. Alcohol marketing research: The need for a new agenda. *Addiction*  
18 8  
19 2011;106(3):466-471.  
20  
21 9 52. Holmes J, Meier PS, Angus C, *et al.* Scotland's policy on minimum unit pricing for  
22 alcohol: The legal barriers are gone so what are the implications for implementation  
23 and evaluation? *Addiction* 2018;113(2):203-204.  
24 10  
25 and evaluation? *Addiction* 2018;113(2):203-204.  
26 11  
27  
28 12 53. Advertising Standards Authority. *Committee of Advertising Practitioners Code*  
29 (Broadcast): 18, Alcohol, London: Advertising Standards Authority, 2018.  
30 13  
31  
32 14 54. Portman Group. *Code of practice on the naming, packaging, and promotion of*  
33 alcoholic drinks (5<sup>th</sup> Edition). London: The Portman Group, 2015.  
34 15  
35  
36 16 55. Fogarty AS, Chapman S. What should be done about policy on alcohol pricing and  
37 promotions? Australians experts' views of policy priorities: A qualitative interviews  
38 17  
39 study. *BMC Public Health* 2013;13:610.  
40 18  
41  
42 19 56. Morey Y, Eadie D, Purves RI, *et al.* *Specialist views of alcohol marketing regulation*  
43 in the UK, London: Cancer Research UK, 2017.  
44 20  
45  
46  
47  
48  
49  
50  
51  
52  
53  
54  
55  
56  
57  
58  
59  
60

**Running head:** Alcohol marketing and consumption in young people in the UK**Table 1.** Awareness of alcohol marketing in the past month for young people in the UK

|                                                                                   | Every day<br>[28] <sup>1</sup> | 5-6 times<br>per week<br>[22] <sup>1</sup> | 3-4 times<br>per week<br>[14] <sup>1</sup> | 1-2 times<br>per week<br>[6] <sup>1</sup> | Less than<br>once a week<br>[2] <sup>1</sup> | Not in the<br>last month<br>[0] <sup>1</sup> | Not<br>sure | Seen<br>at<br>least<br>weekly | Median<br>Score<br>(IQR) <sup>2</sup> |
|-----------------------------------------------------------------------------------|--------------------------------|--------------------------------------------|--------------------------------------------|-------------------------------------------|----------------------------------------------|----------------------------------------------|-------------|-------------------------------|---------------------------------------|
| Marketing channel                                                                 | %                              | %                                          | %                                          | %                                         | %                                            | %                                            | %           | %                             |                                       |
| Adverts for alcohol                                                               |                                |                                            |                                            |                                           |                                              |                                              |             |                               |                                       |
| ... in newspapers or magazines                                                    | 1.9                            | 1.8                                        | 4.9                                        | 10.2                                      | 12.2                                         | 42.3                                         | 26.8        | 18.8                          | 0 (6)                                 |
| ... on television                                                                 | 5.0                            | 5.4                                        | 12.0                                       | 20.5                                      | 15.4                                         | 22.4                                         | 19.3        | 42.9                          | 6 (14)                                |
| ... on billboards                                                                 | 3.0                            | 3.1                                        | 7.4                                        | 14.3                                      | 17.2                                         | 30.2                                         | 24.8        | 27.9                          | 2 (6)                                 |
| ... on radio                                                                      | 1.1                            | 1.0                                        | 2.3                                        | 5.1                                       | 7.1                                          | 54.7                                         | 28.8        | 9.4                           | 0 (0)                                 |
| ... on YouTube, Tumblr, Facebook, Snapchat, Instagram or other social media       | 2.9                            | 2.3                                        | 8.1                                        | 14.0                                      | 15.6                                         | 32.1                                         | 25.0        | 27.3                          | 2 (6)                                 |
| Famous people in films, music videos, on TV or pictured in magazines with alcohol | 4.9                            | 5.3                                        | 10.8                                       | 17.6                                      | 14.4                                         | 23.2                                         | 23.6        | 38.7                          | 6 (14)                                |
| Sport sponsorship                                                                 | 2.4                            | 3.4                                        | 7.9                                        | 17.0                                      | 17.4                                         | 27.8                                         | 24.1        | 30.7                          | 2 (6)                                 |
| Special offers                                                                    | 5.3                            | 5.3                                        | 12.3                                       | 18.8                                      | 14.1                                         | 21.3                                         | 22.8        | 41.7                          | 6 (14)                                |
| Competitions                                                                      | 1.4                            | 1.2                                        | 2.8                                        | 8.2                                       | 11.9                                         | 45.6                                         | 29.0        | 13.6                          | 0 (2)                                 |

Notes:

<sup>1</sup> Score for estimating the approximate number of days on which noticed alcohol marketing in a one month period.<sup>2</sup> Median number of alcohol marketing instances noticed in a one month period.

Base: All respondents (n=3,399): weighted.

**Running head: Alcohol marketing and consumption in young people in the UK****Table 2.** Classification of alcohol marketing awareness (low, medium, and high) by demographic and confounding variables

| Variable                   | Valid n<br>(n= 1,411) <sup>1</sup> |   | Low<br>awareness <sup>2</sup> | Medium<br>awareness <sup>3</sup> | High<br>awareness <sup>4</sup> | $\chi^2$ | p      |
|----------------------------|------------------------------------|---|-------------------------------|----------------------------------|--------------------------------|----------|--------|
| <b>Gender</b>              |                                    |   |                               |                                  |                                | 9.26     | <0.01  |
| Male                       | 735                                | % | 32.1                          | 30.5                             | 37.4                           |          |        |
| Female                     | 676                                | % | 37.3                          | 32.8                             | 29.9                           |          |        |
| <b>Ethnicity</b>           |                                    |   |                               |                                  |                                | 1.09     | n.s.   |
| White British              | 1,082                              | % | 34.5                          | 32.3                             | 33.3                           |          |        |
| Other ethnicity            | 317                                | % | 35.0                          | 29.3                             | 35.6                           |          |        |
| <b>IMD Quintile</b>        |                                    |   |                               |                                  |                                | 10.56    | n.s.   |
| 1 (most deprived)          | 247                                | % | 34.4                          | 26.3                             | 39.3                           |          |        |
| 2                          | 266                                | % | 35.7                          | 28.2                             | 36.1                           |          |        |
| 3                          | 288                                | % | 36.8                          | 31.9                             | 31.2                           |          |        |
| 4                          | 292                                | % | 32.2                          | 34.6                             | 33.2                           |          |        |
| 5 (least deprived)         | 317                                | % | 34.1                          | 35.3                             | 30.6                           |          |        |
| <b>Country lived in</b>    |                                    |   |                               |                                  |                                | 6.89     | n.s.   |
| England                    | 1,230                              | % | 34.5                          | 32.0                             | 33.6                           |          |        |
| Scotland                   | 93                                 | % | 34.4                          | 33.3                             | 32.3                           |          |        |
| Wales                      | 53                                 | % | 39.6                          | 30.2                             | 30.2                           |          |        |
| Northern Ireland           | 34                                 | % | 29.4                          | 17.6                             | 52.9                           |          |        |
| <b>Legal purchase age</b>  |                                    |   |                               |                                  |                                | 14.10    | <0.01  |
| No                         | 995                                | % | 37.6                          | 30.7                             | 31.8                           |          |        |
| Yes                        | 416                                | % | 27.4                          | 33.7                             | 38.9                           |          |        |
| <b>Current drinker</b>     |                                    |   |                               |                                  |                                | 114.04   | <0.001 |
| No                         | 609                                | % | 49.9                          | 26.9                             | 23.2                           |          |        |
| Yes                        | 784                                | % | 23.1                          | 34.8                             | 42.1                           |          |        |
| <b>Higher risk drinker</b> |                                    |   |                               |                                  |                                | 85.84    | <0.001 |
| No                         | 1,027                              | % | 41.7                          | 29.1                             | 29.2                           |          |        |
| Yes                        | 384                                | % | 15.6                          | 38.3                             | 46.1                           |          |        |
| <b>Education</b>           |                                    |   |                               |                                  |                                | 13.90    | <0.001 |
| Not in education           | 79                                 | % | 17.7                          | 31.6                             | 50.6                           |          |        |
| In education               | 1,330                              | % | 35.6                          | 31.7                             | 32.8                           |          |        |
| <b>Working status</b>      |                                    |   |                               |                                  |                                | 7.93     | <0.05  |
| Not in work                | 1,282                              | % | 35.6                          | 31.6                             | 32.8                           |          |        |
| In work                    | 127                                | % | 24.4                          | 32.3                             | 43.3                           |          |        |
| <b>Parents accept use</b>  |                                    |   |                               |                                  |                                | 63.06    | <0.001 |
| No                         | 722                                | % | 44.2                          | 28.4                             | 27.4                           |          |        |
| Yes                        | 689                                | % | 24.4                          | 35.0                             | 40.6                           |          |        |
| <b>Peer accept use</b>     |                                    |   |                               |                                  |                                | 73.08    | <0.001 |
| No                         | 410                                | % | 51.5                          | 24.4                             | 24.1                           |          |        |
| Yes                        | 1001                               | % | 27.7                          | 34.6                             | 37.8                           |          |        |

Notes:

<sup>1</sup>Valid sample excludes those who had reported 'not sure' to any marketing channels); sample is weighted.<sup>2</sup> Low awareness equals  $\leq 16$  instances per month (i.e. once every other day);<sup>3</sup> Medium awareness equals 17-53 instances per month (i.e. almost once a day or more);<sup>4</sup> High awareness equals  $\geq 54$  instances per month (i.e. almost twice a day or more); $\chi^2$  = Bivariate Pearson Chi Square.

Due to a large number of categories, analysis of how awareness of alcohol marketing varied by mother (female carer), father (male carer), and close friend frequency consumption only reported in text.

**Running head:** Alcohol marketing and consumption in young people in the UK**Table 3.** Ownership of alcohol branded items by demographic and confounding variables

| Variable                   | <i>Valid n</i><br>( <i>n</i> = 3,276) <sup>1</sup> |   | Own branded<br>merchandise | $\chi^2$ | <i>p</i> |
|----------------------------|----------------------------------------------------|---|----------------------------|----------|----------|
| <b>Gender</b>              |                                                    |   |                            | 2.71     | n.s.     |
| Male                       | 1,679                                              | % | 18.5                       |          |          |
| Female                     | 1,597                                              | % | 16.3                       |          |          |
| <b>Ethnicity</b>           |                                                    |   |                            | 16.68    | <0.001   |
| White British              | 2,506                                              | % | 19.0                       |          |          |
| Other ethnicity            | 745                                                | % | 12.5                       |          |          |
| <b>IMD Quintile</b>        |                                                    |   |                            | 15.73    | <0.01    |
| 1 (Most deprived)          | 652                                                | % | 13.5                       |          |          |
| 2                          | 646                                                | % | 21.1                       |          |          |
| 3                          | 644                                                | % | 17.2                       |          |          |
| 4                          | 662                                                | % | 19.5                       |          |          |
| 5 (Least deprived)         | 655                                                | % | 16.0                       |          |          |
| <b>Country lived in</b>    |                                                    |   |                            | 0.97     | n.s.     |
| England                    | 2,759                                              | % | 17.4                       |          |          |
| Scotland                   | 260                                                | % | 16.2                       |          |          |
| Wales                      | 155                                                | % | 16.8                       |          |          |
| Northern Ireland           | 103                                                | % | 20.4                       |          |          |
| <b>Legal purchase age</b>  |                                                    |   |                            | 100.33   | <0.001   |
| No                         | 2,488                                              | % | 13.7                       |          |          |
| Yes                        | 788                                                | % | 29.2                       |          |          |
| <b>Current drinker</b>     |                                                    |   |                            | 256.07   | <0.001   |
| No                         | 1,683                                              | % | 7.2                        |          |          |
| Yes                        | 1,549                                              | % | 28.7                       |          |          |
| <b>Higher risk drinker</b> |                                                    |   |                            | 222.98   | <0.001   |
| No                         | 2,543                                              | % | 12.3                       |          |          |
| Yes                        | 690                                                | % | 36.7                       |          |          |
| <b>Education</b>           |                                                    |   |                            | 43.73    | <0.001   |
| Not in education           | 161                                                | % | 36.6                       |          |          |
| In education               | 3,106                                              | % | 16.4                       |          |          |
| <b>Working status</b>      |                                                    |   |                            | 31.08    | <0.001   |
| Not in work                | 3,028                                              | % | 16.3                       |          |          |
| In work                    | 239                                                | % | 30.5                       |          |          |
| <b>Parents accept use</b>  |                                                    |   |                            | 189.06   | <0.001   |
| No                         | 1,920                                              | % | 9.7                        |          |          |
| Yes                        | 1,357                                              | % | 28.2                       |          |          |
| <b>Peer accept use</b>     |                                                    |   |                            | 97.68    | <0.001   |
| No                         | 1,066                                              | % | 8.0                        |          |          |
| Yes                        | 2,210                                              | % | 21.9                       |          |          |

Notes:

<sup>1</sup>Valid sample refers to those who answered 'yes' or 'no'. Missing cases due to 'don't know' response (*n* = 123). Sample is weighted. $\chi^2$  = Bivariate Pearson Chi Square.

Due to a large number of categories, analysis of how ownership of alcohol branded merchandise varied by mother (female carer), father (male carer), and close friend frequency consumption only reported in text.

**Running head:** Alcohol marketing and consumption in young people in the UK

1  
2  
3  
4  
5  
6  
7  
8  
9  
10  
11  
12  
13  
14  
15  
16  
17  
18  
19  
20  
21  
22  
23  
24  
25  
26  
27  
28  
29  
30  
31  
32  
33  
34  
35  
36  
37  
38  
39  
40  
41  
42  
43  
44  
45  
46  
47  
48  
49  
50  
51  
52  
53  
54  
55  
56  
57  
58  
59  
60

For peer review only

**Running head:** Alcohol marketing and consumption in young people in the UK**Table 4.** Association between alcohol marketing awareness and AUDIT-C scoring in current drinkers

| Variables and reference categories                            | Unstandardized coefficients |              |              |      | Standard coefficient |          |          |
|---------------------------------------------------------------|-----------------------------|--------------|--------------|------|----------------------|----------|----------|
|                                                               | <i>b</i>                    | 95% CI Lower | 95% CI Upper | SE   | $\beta$              | <i>t</i> | <i>p</i> |
| <b>Constant</b>                                               | -5.57                       | -7.05        | -4.09        | 0.75 |                      | -7.40    | <0.001   |
| <b>Age</b>                                                    | 0.43                        | 0.35         | 0.51         | 0.04 | 0.30                 | 10.70    | <0.001   |
| <b>Gender</b>                                                 |                             |              |              |      |                      |          |          |
| Male ( <i>vs. female</i> )                                    | 0.31                        | 0.09         | 0.54         | 0.11 | 0.06                 | 2.76     | <0.01    |
| <b>Ethnicity</b>                                              |                             |              |              |      |                      |          |          |
| White British ( <i>vs. other</i> )                            | 0.08                        | -0.24        | 0.40         | 0.16 | 0.01                 | 0.52     | n.s.     |
| <b>IMD Quintile</b>                                           |                             |              |              |      |                      |          |          |
| (1 : most deprived to 5: most affluent)                       | 0.11                        | 0.03         | 0.20         | 0.04 | 0.06                 | 2.68     | <0.01    |
| <b>Country</b>                                                |                             |              |              |      |                      |          |          |
| Scotland ( <i>vs. England</i> )                               | -0.05                       | -0.40        | 0.31         | 0.18 | -0.01                | -0.26    | n.s.     |
| Wales & Northern Ireland ( <i>vs. England</i> )               | -0.37                       | -0.76        | 0.01         | 0.20 | -0.04                | -1.90    | n.s.     |
| <b>Educational status</b>                                     |                             |              |              |      |                      |          |          |
| In education ( <i>vs. not</i> )                               | 0.66                        | 0.22         | 1.10         | 0.22 | 0.07                 | 2.96     | <0.01    |
| <b>Working status</b>                                         |                             |              |              |      |                      |          |          |
| Working ( <i>vs. not</i> )                                    | 0.31                        | -0.06        | 0.67         | 0.19 | 0.04                 | 1.66     | n.s.     |
| <b>Living status</b>                                          |                             |              |              |      |                      |          |          |
| Living independently ( <i>vs. with parents/adult family</i> ) | 0.87                        | 0.54         | 1.20         | 0.17 | 0.12                 | 5.17     | <0.001   |
| Not stated ( <i>vs. with parents/adult family</i> )           | 0.42                        | -0.66        | 1.49         | 0.55 | 0.02                 | 0.76     | n.s.     |
| <b>Frequency of mother drinking</b>                           |                             |              |              |      |                      |          |          |
| Never ( <i>vs. at least monthly</i> )                         | 0.04                        | -0.41        | 0.49         | 0.23 | 0.00                 | 0.17     | n.s.     |
| Less than monthly ( <i>vs. at least monthly</i> )             | -0.31                       | -0.63        | 0.00         | 0.16 | -0.04                | -1.94    | n.s.     |
| Not stated ( <i>vs. at least monthly</i> )                    | 0.42                        | -0.20        | 1.03         | 0.31 | 0.03                 | 1.33     | n.s.     |
| <b>Frequency of father drinking</b>                           |                             |              |              |      |                      |          |          |
| Never ( <i>vs. at least monthly</i> )                         | 0.21                        | -0.33        | 0.75         | 0.27 | 0.02                 | 0.77     | n.s.     |
| Less than monthly ( <i>vs. at least monthly</i> )             | 0.32                        | -0.08        | 0.72         | 0.20 | 0.03                 | 1.57     | n.s.     |
| Not stated ( <i>vs. at least monthly</i> )                    | 0.33                        | -0.04        | 0.71         | 0.19 | 0.04                 | 1.76     | n.s.     |
| <b>Frequency of close friends drinking</b>                    |                             |              |              |      |                      |          |          |
| At least weekly ( <i>vs. less often or never</i> )            | 1.44                        | 1.19         | 1.69         | 0.13 | 0.26                 | 11.32    | <0.001   |
| Not stated ( <i>vs. less than weekly or never</i> )           | -0.49                       | -0.85        | -0.12        | 0.19 | -0.06                | -2.61    | <0.01    |
| <b>Parents' views</b>                                         |                             |              |              |      |                      |          |          |
| Drinking acceptable ( <i>vs. neutral/unacceptable</i> )       | 0.29                        | 0.01         | 0.57         | 0.14 | 0.05                 | 2.06     | <0.05    |
| <b>Peer views</b>                                             |                             |              |              |      |                      |          |          |

**Running head:** Alcohol marketing and consumption in young people in the UK

|                                                |       |       |       |      |       |       |        |
|------------------------------------------------|-------|-------|-------|------|-------|-------|--------|
| Drinking acceptable (vs. neutral/unacceptable) | 0.08  | -0.32 | 0.48  | 0.21 | 0.01  | 0.38  | n.s.   |
| <b>Age of first drink</b>                      |       |       |       |      |       |       |        |
| Age 13 or under (vs. 14 to 15 years)           | 0.22  | -0.07 | 0.51  | 0.15 | 0.04  | 1.50  | n.s.   |
| Age 16 or over (vs. 14 to 15 years)            | -1.33 | -1.63 | -1.04 | 0.15 | -0.21 | -8.82 | <0.001 |
| Not stated (vs. 14 to 15 years)                | -0.48 | -0.89 | -0.07 | 0.21 | -0.05 | -2.28 | <0.05  |
| <b>Alcohol Marketing Awareness</b>             |       |       |       |      |       |       |        |
| Medium (vs. low awareness)                     | 0.79  | 0.37  | 1.21  | 0.21 | 0.11  | 3.70  | <0.001 |
| High (vs. low awareness)                       | 0.85  | 0.44  | 1.26  | 0.21 | 0.12  | 4.08  | <0.001 |
| Not stated (vs. low awareness)                 | 0.40  | 0.04  | 0.76  | 0.18 | 0.07  | 2.20  | <0.05  |
| <b>Own alcohol branded merchandise</b>         |       |       |       |      |       |       |        |
| Yes (vs. no/not sure)                          | 0.79  | 0.55  | 1.04  | 0.13 | 0.13  | 6.30  | <0.001 |

## Notes:

Based on current drinkers:  $n = 1,592$ ; data are unweighted.

DV = AUDIT-C Scoring (0-12)

Model shown is final block. Total variance explained (Adj.  $R^2 = 0.36$ ). Durbin Watson = 2.01.

Final step model change:  $F(4, 1,564) = 17.44, p < 0.001$ .

Overall Final model ANOVA:  $F(27, 1,564) = 34.33, p < 0.001$ .

**Running head:** Alcohol marketing and consumption in young people in the UK**Table 5.** Logistic regression of association between alcohol marketing and higher risk consumption among current drinkers

|                                       | <b>Higher risk consumption among current drinkers</b> |                  |        |        |          |
|---------------------------------------|-------------------------------------------------------|------------------|--------|--------|----------|
|                                       | <i>n</i>                                              | AOR <sup>1</sup> | 95% CI | 95% CI | <i>p</i> |
|                                       |                                                       |                  | Lower  | Upper  |          |
| <b>Age</b>                            | 1,131                                                 | 1.40             | 1.28   | 1.53   | <0.001   |
| <b>Gender</b>                         |                                                       |                  |        |        |          |
| Female                                | 824                                                   | Ref              |        |        |          |
| Male                                  | 768                                                   | 1.32             | 1.04   | 1.68   | <0.05    |
| <b>Ethnicity</b>                      |                                                       |                  |        |        |          |
| Other                                 | 228                                                   | Ref              |        |        |          |
| White British                         | 1,364                                                 | 0.97             | 0.69   | 1.37   | n.s.     |
| <b>IMD Quintile</b>                   |                                                       |                  |        |        | n.s.     |
| 1 (most deprived)                     | 232                                                   | Ref              |        |        |          |
| 2 vs. 1                               | 334                                                   | 1.65             | 1.08   | 2.52   | <0.05    |
| 3 vs. 1,2                             | 324                                                   | 1.26             | 0.90   | 1.76   | n.s.     |
| 4 vs. 1,2,3                           | 340                                                   | 1.21             | 0.90   | 1.64   | n.s.     |
| 5 (most affluent) vs. 1,2,3,4         | 362                                                   | 1.23             | 0.93   | 1.64   | n.s.     |
| <b>Country</b>                        |                                                       |                  |        |        | n.s.     |
| England                               | 1,243                                                 | Ref              |        |        |          |
| Scotland                              | 197                                                   | 0.88             | 0.60   | 1.28   | n.s.     |
| Wales                                 | 116                                                   | 0.58             | 0.36   | 0.93   | <0.05    |
| Northern Ireland                      | 36                                                    | 1.35             | 0.60   | 3.01   | n.s.     |
| <b>Educational status</b>             |                                                       |                  |        |        |          |
| Not in education                      | 146                                                   | Ref              |        |        |          |
| In education                          | 1,446                                                 | 1.61             | 1.01   | 2.55   | <0.05    |
| <b>Working status</b>                 |                                                       |                  |        |        |          |
| Not working                           | 1,374                                                 | Ref              |        |        |          |
| Working (full or part-time)           | 218                                                   | 1.43             | 0.97   | 2.09   | n.s.     |
| <b>Living status</b>                  |                                                       |                  |        |        |          |
| Living with parents/adult family      | 1,307                                                 | Ref              |        |        |          |
| Living independently                  | 268                                                   | 1.56             | 1.09   | 2.23   | <0.05    |
| Not stated                            | 17                                                    | 1.58             | 0.54   | 4.60   | n.s.     |
| <b>Frequency of mother drinking</b>   |                                                       |                  |        |        | <0.05    |
| Never                                 | 115                                                   | ref              |        |        |          |
| Less than monthly vs. never           | 284                                                   | 0.47             | 0.27   | 0.79   | <0.01    |
| Monthly or fortnightly vs. less often | 279                                                   | 1.22             | 0.83   | 1.79   | n.s.     |
| At least weekly vs. less often        | 849                                                   | .93              | .70    | 1.24   | n.s.     |
| Not stated vs. all other categories   | 65                                                    | 1.50             | .78    | 2.88   | n.s.     |
| <b>Frequency of father drinking</b>   |                                                       |                  |        |        | n.s.     |
| Never                                 | 76                                                    | ref              |        |        |          |
| Less than monthly vs. never           | 160                                                   | 1.40             | 0.72   | 2.73   | n.s.     |



**Running head:** Alcohol marketing and consumption in young people in the UK

|                                                                                                                                                   |       |      |      |      |        |
|---------------------------------------------------------------------------------------------------------------------------------------------------|-------|------|------|------|--------|
| Monthly or fortnightly vs. less often                                                                                                             | 201   | 0.73 | 0.46 | 1.19 | n.s.   |
| At least weekly vs. less often                                                                                                                    | 964   | 0.83 | 0.61 | 1.15 | n.s.   |
| Not stated vs. all other categories                                                                                                               | 191   | 1.14 | 0.75 | 1.72 | n.s.   |
| <b>Frequency of close friends drinking</b>                                                                                                        |       |      |      |      | <0.001 |
| Never                                                                                                                                             | 72    | ref  |      |      |        |
| Less than monthly vs. never                                                                                                                       | 187   | 0.68 | 0.32 | 1.42 | n.s.   |
| Monthly or fortnightly vs. less often                                                                                                             | 463   | 2.20 | 1.44 | 3.35 | <0.001 |
| At least weekly vs. less often                                                                                                                    | 667   | 3.41 | 2.48 | 4.70 | <0.001 |
| Not stated vs. all other categories                                                                                                               | 203   | 0.57 | 0.37 | 0.89 | 0.013  |
| <b>Parents' views</b>                                                                                                                             |       |      |      |      |        |
| Neutral or unacceptable                                                                                                                           | 473   | Ref  |      |      |        |
| Drinking acceptable                                                                                                                               | 1,119 | 0.92 | 0.68 | 1.24 | n.s.   |
| <b>Peer views</b>                                                                                                                                 |       |      |      |      |        |
| Neutral or unacceptable                                                                                                                           | 156   | Ref  |      |      |        |
| Drinking acceptable                                                                                                                               | 1,436 | 1.41 | 0.88 | 2.25 | n.s.   |
| <b>Age of first drink</b>                                                                                                                         |       |      |      |      | <0.001 |
| Age 13 or under                                                                                                                                   | 472   | Ref  |      |      |        |
| Age 14 to 15 (vs. 13 or under)                                                                                                                    | 535   | 0.86 | 0.63 | 1.18 | n.s.   |
| Age 16 or over (vs. younger)                                                                                                                      | 412   | 0.26 | 0.19 | 0.35 | <0.001 |
| Not stated                                                                                                                                        | 173   | 0.89 | 0.59 | 1.35 | n.s.   |
| <b>Alcohol Marketing Awareness</b>                                                                                                                |       |      |      |      | <0.001 |
| Low awareness                                                                                                                                     | 184   | Ref  |      |      |        |
| Medium vs. low                                                                                                                                    | 274   | 2.18 | 1.39 | 3.42 | <0.001 |
| High vs. medium and low                                                                                                                           | 326   | 1.43 | 1.01 | 2.02 | <0.01  |
| Not stated vs. all other categories                                                                                                               | 808   | 0.85 | 0.67 | 1.08 | n.s.   |
| <b>Own alcohol branded merchandise</b>                                                                                                            |       |      |      |      |        |
| No or not sure                                                                                                                                    | 1,138 | Ref  |      |      |        |
| Yes                                                                                                                                               | 454   | 1.71 | 1.31 | 2.22 | <0.001 |
| Notes:                                                                                                                                            |       |      |      |      |        |
| Based on current drinkers ( $n = 1,592$ ); data are unweighted.                                                                                   |       |      |      |      |        |
| DV: Higher risk drinking on the AUDIT-C ( $\geq 5$ ), 1 = Higher risk ( $n = 699$ ) and 0 = Lower risk ( $n = 893$ )                              |       |      |      |      |        |
| Test of model coefficients in final block: $\chi^2 (35) = 477.29, p < 0.001$ .                                                                    |       |      |      |      |        |
| Hosmer & Lemeshow for final block $\chi^2 (8) = 11.66, p = 0.17$ .                                                                                |       |      |      |      |        |
| Nagelkerke $R^2$ for final block = 0.35.                                                                                                          |       |      |      |      |        |
| Cases correctly classified in final block: 72% in final block                                                                                     |       |      |      |      |        |
| <sup>1</sup> Adjusted for all other variables in the model, Adj OR, adjusted odds ratio; ref, reference category; 95% CI, 95% confidence interval |       |      |      |      |        |

**Running head:** Alcohol marketing and consumption in young people in the UK**Table 6.** Logistic regression of association between alcohol marketing and never drinkers' susceptibility to drink

|                                       | Susceptibility to drink among never drinkers |                  |                    |                    |          |
|---------------------------------------|----------------------------------------------|------------------|--------------------|--------------------|----------|
|                                       | <i>n</i>                                     | AOR <sup>1</sup> | 95%<br>CI<br>Lower | 95%<br>CI<br>Upper | <i>p</i> |
| <b>Age</b>                            | 1,580                                        | 1.05             | 0.98               | 1.13               | n.s.     |
| <b>Gender</b>                         |                                              |                  |                    |                    |          |
| Female                                | 791                                          | ref              |                    |                    |          |
| Male                                  | 789                                          | 1.09             | 0.88               | 1.37               | n.s.     |
| <b>Ethnicity</b>                      |                                              |                  |                    |                    |          |
| Other                                 | 377                                          | ref              |                    |                    |          |
| White British                         | 1,203                                        | 1.51             | 1.12               | 2.03               | <0.01    |
| <b>IMD Quintile</b>                   |                                              |                  |                    |                    | n.s.     |
| 1 (most deprived)                     | 399                                          | ref              |                    |                    |          |
| 2 vs. 1                               | 278                                          | 1.13             | 0.80               | 1.60               | n.s.     |
| 3 vs. 1,2                             | 355                                          | 1.02             | 0.76               | 1.36               | n.s.     |
| 4 vs. 1,2,3                           | 233                                          | 0.88             | 0.64               | 1.22               | n.s.     |
| 5 (most affluent) vs. 1,2,3,4         | 315                                          | 0.84             | 0.63               | 1.11               | n.s.     |
| <b>Country</b>                        |                                              |                  |                    |                    | n.s.     |
| England                               | 1,193                                        | ref              |                    |                    |          |
| Scotland                              | 191                                          | 1.14             | 0.80               | 1.61               | n.s.     |
| Wales                                 | 115                                          | 1.09             | 0.70               | 1.69               | n.s.     |
| Northern Ireland                      | 81                                           | 0.96             | 0.58               | 1.59               | n.s.     |
| <b>Educational status</b>             |                                              |                  |                    |                    |          |
| Not in education                      | 25                                           | ref              |                    |                    |          |
| In education                          | 1,555                                        | 0.67             | 0.20               | 2.25               | n.s.     |
| <b>Working status</b>                 |                                              |                  |                    |                    |          |
| Not working                           | 1,550                                        | ref              |                    |                    |          |
| Working (full or part-time)           | 30                                           | 2.59             | 0.83               | 8.11               | n.s.     |
| <b>Living status</b>                  |                                              |                  |                    |                    | n.s.     |
| Living with parents/adult family      | 1,545                                        | ref              |                    |                    |          |
| Living independently                  | 28                                           | 0.51             | 0.20               | 1.28               | n.s.     |
| Not stated                            | 7                                            | 1.57             | 0.27               | 9.11               | n.s.     |
| <b>Frequency of mother drinking</b>   |                                              |                  |                    |                    | <0.001   |
| Never                                 | 321                                          | ref              |                    |                    | <0.001   |
| Less than monthly vs. never           | 382                                          | 2.38             | 1.58               | 3.59               | <0.001   |
| Monthly or fortnightly vs. less often | 242                                          | 1.66             | 1.15               | 2.39               | <0.01    |
| At least weekly vs. less often        | 560                                          | 1.47             | 1.11               | 1.94               | <0.01    |
| Not stated vs. all other categories   | 75                                           | 1.25             | 0.70               | 2.25               | n.s.     |
| <b>Frequency of father drinking</b>   |                                              |                  |                    |                    | <0.05    |
| Never                                 | 273                                          | ref              |                    |                    |          |
| Less than monthly vs. never           | 217                                          | 1.88             | 1.17               | 3.01               | <0.01    |
| Monthly or fortnightly vs. less often | 232                                          | 1.11             | 0.75               | 1.64               | n.s.     |

**Running head:** Alcohol marketing and consumption in young people in the UK

|                                            |       |      |      |      |        |
|--------------------------------------------|-------|------|------|------|--------|
| At least weekly vs. less often             | 686   | 1.39 | 1.05 | 1.84 | <0.05  |
| Not stated vs. all other categories        | 172   | 1.06 | 0.71 | 1.58 | n.s.   |
| <b>Frequency of close friends drinking</b> |       |      |      |      | <0.001 |
| Never                                      | 922   | ref  |      |      |        |
| Less than monthly vs. never                | 162   | 3.46 | 2.26 | 5.26 | <0.001 |
| Monthly or fortnightly vs. less often      | 80    | 3.32 | 1.66 | 6.65 | <0.001 |
| At least weekly vs. less often             | 83    | 0.70 | 0.39 | 1.26 | n.s.   |
| Not stated vs. all other categories        | 333   | 0.61 | 0.43 | 0.86 | <0.01  |
| <b>Parents' views</b>                      |       |      |      |      |        |
| Neutral or unacceptable                    | 1,364 | ref  |      |      |        |
| Drinking acceptable                        | 216   | 1.00 | 0.70 | 1.44 | n.s.   |
| <b>Peer views</b>                          |       |      |      |      |        |
| Neutral or unacceptable                    | 894   | ref  |      |      |        |
| Drinking acceptable                        | 686   | 2.29 | 1.77 | 2.96 | <0.001 |
| <b>Alcohol Marketing Awareness</b>         |       |      |      |      | n.s.   |
| Low awareness                              | 279   | ref  |      |      |        |
| Medium vs. low                             | 148   | 1.44 | 0.92 | 2.28 | n.s.   |
| High vs. medium and low                    | 117   | 1.16 | 0.71 | 1.90 | n.s.   |
| Not stated vs. all other categories        | 1,036 | 1.21 | 0.94 | 1.56 | n.s.   |
| <b>Own alcohol branded merchandise</b>     |       |      |      |      |        |
| No or not sure                             | 1,476 | ref  |      |      |        |
| Yes                                        | 104   | 1.98 | 1.20 | 3.24 | <0.01  |

## Notes:

Based on never drinkers ( $n = 1,580$ ) data are unweighted.

DV: Susceptibility: 1 = Susceptible ( $n = 830$ ) = 0; Not susceptible ( $n = 750$ ).

Test of model coefficients in final block:  $\chi^2(32) = 337.46, p < 0.001$ .

Hosmer & Lemeshow for final block  $\chi^2(8) = 5.86, p = 0.663$

Nagelkerke  $R^2$  for final block = 0.26.

Cases correctly classified in final block: 69%

<sup>1</sup> adjusted for all other variables in the model, Adj OR, adjusted odds ratio; ref, reference category; 95% CI, 95% confidence interval

<sup>2</sup> Variable not applicable to those who were classed as 'never drinkers'

**STROBE 2007 (v4) Statement—Checklist of items that should be included in reports of *cross-sectional studies***

| Section/Topic                | Item # | Recommendation                                                                                                                                                                       | Reported on page # |
|------------------------------|--------|--------------------------------------------------------------------------------------------------------------------------------------------------------------------------------------|--------------------|
| <b>Title and abstract</b>    | 1      | (a) Indicate the study's design with a commonly used term in the title or the abstract                                                                                               | 1,2                |
|                              |        | (b) Provide in the abstract an informative and balanced summary of what was done and what was found                                                                                  | 2                  |
| <b>Introduction</b>          |        |                                                                                                                                                                                      |                    |
| Background/rationale         | 2      | Explain the scientific background and rationale for the investigation being reported                                                                                                 | 4,5,6              |
| Objectives                   | 3      | State specific objectives, including any prespecified hypotheses                                                                                                                     | 6                  |
| <b>Methods</b>               |        |                                                                                                                                                                                      |                    |
| Study design                 | 4      | Present key elements of study design early in the paper                                                                                                                              | 6                  |
| Setting                      | 5      | Describe the setting, locations, and relevant dates, including periods of recruitment, exposure, follow-up, and data collection                                                      | 6                  |
| Participants                 | 6      | (a) Give the eligibility criteria, and the sources and methods of selection of participants                                                                                          | 6                  |
| Variables                    | 7      | Clearly define all outcomes, exposures, predictors, potential confounders, and effect modifiers. Give diagnostic criteria, if applicable                                             | 7,8,9,10           |
| Data sources/<br>measurement | 8*     | For each variable of interest, give sources of data and details of methods of assessment (measurement). Describe comparability of assessment methods if there is more than one group | 7,8,9,10           |
| Bias                         | 9      | Describe any efforts to address potential sources of bias                                                                                                                            | 7,8,9,10,11,12     |
| Study size                   | 10     | Explain how the study size was arrived at                                                                                                                                            | N/A                |
| Quantitative variables       | 11     | Explain how quantitative variables were handled in the analyses. If applicable, describe which groupings were chosen and why                                                         | 7,8,9,10,11,12     |
| Statistical methods          | 12     | (a) Describe all statistical methods, including those used to control for confounding                                                                                                | 11,12              |
|                              |        | (b) Describe any methods used to examine subgroups and interactions                                                                                                                  | 11,12              |
|                              |        | (c) Explain how missing data were addressed                                                                                                                                          | 11,12              |
|                              |        | (d) If applicable, describe analytical methods taking account of sampling strategy                                                                                                   | 11,12              |
|                              |        | (e) Describe any sensitivity analyses                                                                                                                                                | 11,12              |
| <b>Results</b>               |        |                                                                                                                                                                                      |                    |

|                          |     |                                                                                                                                                                                                              |                              |
|--------------------------|-----|--------------------------------------------------------------------------------------------------------------------------------------------------------------------------------------------------------------|------------------------------|
| Participants             | 13* | (a) Report numbers of individuals at each stage of study—eg numbers potentially eligible, examined for eligibility, confirmed eligible, included in the study, completing follow-up, and analysed            | 13,14,15,17 (and all tables) |
|                          |     | (b) Give reasons for non-participation at each stage                                                                                                                                                         | 13,14,15,17 (and all tables) |
|                          |     | (c) Consider use of a flow diagram                                                                                                                                                                           | N/A                          |
| Descriptive data         | 14* | (a) Give characteristics of study participants (eg demographic, clinical, social) and information on exposures and potential confounders                                                                     | 12,13                        |
|                          |     | (b) Indicate number of participants with missing data for each variable of interest                                                                                                                          | 13,14,15,17 (and all tables) |
| Outcome data             | 15* | Report numbers of outcome events or summary measures                                                                                                                                                         | 13,14,15,17 (and all tables) |
| Main results             | 16  | (a) Give unadjusted estimates and, if applicable, confounder-adjusted estimates and their precision (eg, 95% confidence interval). Make clear which confounders were adjusted for and why they were included | 13,14,15,17 (and all tables) |
|                          |     | (b) Report category boundaries when continuous variables were categorized                                                                                                                                    | 13,14,15,17 (and all tables) |
|                          |     | (c) If relevant, consider translating estimates of relative risk into absolute risk for a meaningful time period                                                                                             | N/A                          |
| Other analyses           | 17  | Report other analyses done—eg analyses of subgroups and interactions, and sensitivity analyses                                                                                                               | 13,14,15,17 (and all tables) |
| <b>Discussion</b>        |     |                                                                                                                                                                                                              |                              |
| Key results              | 18  | Summarise key results with reference to study objectives                                                                                                                                                     | 17,20                        |
| Limitations              | 19  | Discuss limitations of the study, taking into account sources of potential bias or imprecision. Discuss both direction and magnitude of any potential bias                                                   | 19,20                        |
| Interpretation           | 20  | Give a cautious overall interpretation of results considering objectives, limitations, multiplicity of analyses, results from similar studies, and other relevant evidence                                   | 17,18,19,20                  |
| Generalisability         | 21  | Discuss the generalisability (external validity) of the study results                                                                                                                                        | 17,18,19,20                  |
| <b>Other information</b> |     |                                                                                                                                                                                                              |                              |
| Funding                  | 22  | Give the source of funding and the role of the funders for the present study and, if applicable, for the original study on which the present article is based                                                | 21                           |

\*Give information separately for cases and controls in case-control studies and, if applicable, for exposed and unexposed groups in cohort and cross-sectional studies.

1  
2 **Note:** An Explanation and Elaboration article discusses each checklist item and gives methodological background and published examples of transparent reporting. The STROBE  
3 checklist is best used in conjunction with this article (freely available on the Web sites of PLoS Medicine at <http://www.plosmedicine.org/>, Annals of Internal Medicine at  
4 <http://www.annals.org/>, and Epidemiology at <http://www.epidem.com/>). Information on the STROBE Initiative is available at [www.strobe-statement.org](http://www.strobe-statement.org).  
5  
6  
7  
8  
9  
10  
11  
12  
13  
14  
15  
16  
17  
18  
19  
20  
21  
22  
23  
24  
25  
26  
27  
28  
29  
30  
31  
32  
33  
34  
35  
36  
37  
38  
39  
40  
41  
42  
43  
44  
45  
46

For peer review only

# BMJ Open

**Awareness of alcohol marketing, ownership of alcohol branded merchandise, and the association with alcohol consumption, higher-risk drinking, and drinking susceptibility in adolescents and young adults: A cross-sectional survey in the United Kingdom.**

|                                 |                                                                                                                                                                                                                                                                                                                                                                               |
|---------------------------------|-------------------------------------------------------------------------------------------------------------------------------------------------------------------------------------------------------------------------------------------------------------------------------------------------------------------------------------------------------------------------------|
| Journal:                        | <i>BMJ Open</i>                                                                                                                                                                                                                                                                                                                                                               |
| Manuscript ID                   | bmjopen-2018-025297.R2                                                                                                                                                                                                                                                                                                                                                        |
| Article Type:                   | Research                                                                                                                                                                                                                                                                                                                                                                      |
| Date Submitted by the Author:   | 13-Dec-2018                                                                                                                                                                                                                                                                                                                                                                   |
| Complete List of Authors:       | Critchlow, Nathan; University of Stirling, Institute for Social Marketing<br>Mackintosh, Anne Marie; University of Stirling Institute for Social Marketing<br>Thomas, Christopher; Cancer Research UK, Cancer Policy Research Centre<br>Hooper, Lucie; Cancer Research UK, Cancer Policy Research Centre<br>Vohra, Jyotsna; Cancer Research UK, Cancer Policy Research Centre |
| <b>Primary Subject Heading</b>: | Public health                                                                                                                                                                                                                                                                                                                                                                 |
| Secondary Subject Heading:      | Addiction, Public health                                                                                                                                                                                                                                                                                                                                                      |
| Keywords:                       | PUBLIC HEALTH, Alcohol, Young people, Alcohol Marketing, Survey, Alcohol Advertising                                                                                                                                                                                                                                                                                          |
|                                 |                                                                                                                                                                                                                                                                                                                                                                               |

SCHOLARONE™  
Manuscripts

**Running head:** Alcohol marketing and consumption in young people in the UK

**Title:** Awareness of alcohol marketing, ownership of alcohol branded merchandise, and the association with alcohol consumption, higher-risk drinking, and drinking susceptibility in adolescents and young adults: A cross-sectional survey in the United Kingdom.

**Running head:** Alcohol marketing and consumption in young people in the UK

### **Authors**

Nathan Critchlow<sup>1</sup>

Anne Marie MacKintosh<sup>1</sup>

Christopher Thomas<sup>2</sup>

Lucie Hooper<sup>2</sup>

Jyotsna Vohra<sup>2</sup>

<sup>1</sup> Institute for Social Marketing, Faculty of Health Sciences and Sport, University of Stirling, Stirling.

<sup>2</sup> Cancer Policy Research Centre (CPRC), Cancer Research UK, London.

### **Corresponding author**

Nathan Critchlow, Institute for Social Marketing, Faculty of Health Sciences and Sport, University of Stirling, Stirling, FK9 4LA. E-mail: [nathan.critchlow@stir.ac.uk](mailto:nathan.critchlow@stir.ac.uk); Tel: +44(0)1786467382.

**Word Count:** 4,478

**Table and figure count:** 6 (All tables)



**Running head:** Alcohol marketing and consumption in young people in the UK

**Awareness of alcohol marketing, ownership of alcohol branded merchandise, and the association with alcohol consumption, higher-risk drinking, and drinking susceptibility in adolescents and young adults: A cross-sectional survey in the United Kingdom.**

## ABSTRACT

**Objectives:** To explore awareness of alcohol marketing and ownership of alcohol branded merchandise in adolescents and young adults in the United Kingdom (UK), what factors are associated with awareness and ownership, and what association awareness and ownership has with alcohol consumption, higher-risk drinking, and susceptibility.

**Design:** Online cross-sectional survey conducted April–May 2017.

**Setting:** UK.

**Participants:** Adolescents and young adults aged 11-19 years old in the UK ( $n=3,399$ ).

**Main outcome measures:** Alcohol Use Disorders Identification Test–Consumption (AUDIT-C) (0-12) and indication of higher-risk consumption ( $\geq 5$  AUDIT-C) in current drinkers. Susceptibility to drink (Yes/No) in never drinkers.

**Results:** Eighty-two percent of respondents were aware of at least one form of alcohol marketing in the past month and 17% owned branded merchandise. Chi-square tests found that awareness of marketing and ownership of branded merchandise varied within drinking variables. For example, higher awareness of alcohol marketing was associated with being a current drinker ( $\chi^2=114.04, p<0.001$ ), higher-risk drinking ( $\chi^2=85.84, p<0.001$ ), and perceived parental ( $\chi^2=63.06, p<0.001$ ) and peer approval of consumption ( $\chi^2=73.08, p<0.001$ ). Among current drinkers, multivariate regressions (controlling for demographics and covariates) found that marketing awareness and owning branded merchandise was positively associated with AUDIT-C score and higher-risk consumption. For example, current drinkers reporting medium marketing awareness were twice as likely to be higher-risk drinkers as those reporting low awareness (AOR=2.18, 95% CI: 1.39-3.42,  $p<0.001$ ). Among never drinkers, respondents who owned branded merchandise were twice as likely to be susceptible to drinking as those who did not (AOR=1.98, 95% CI: 1.20-3.24,  $p=0.007$ ).

**Conclusions:** Young people, above and below the legal purchasing age, are aware of a range of alcohol marketing and almost one-in-five own alcohol branded merchandise. In current drinkers, alcohol marketing awareness was associated with increased consumption and greater likelihood of higher-risk consumption. In never drinkers, ownership of branded merchandise was associated with susceptibility.

**Running head:** Alcohol marketing and consumption in young people in the UK

**Keywords:** Alcohol marketing; Young people; Higher-risk drinking; Alcohol Advertising; Susceptibility; Survey; Public Health; Health Policy.

#### **Strengths and limitations of this study**

- This is the first study to examine awareness of alcohol marketing and ownership of alcohol branded merchandise in a demographically representative sample of young people across the UK, including those above and below the legal purchasing age for alcohol.
- The study provides timely insight into what forms of alcohol marketing young people are aware of, how frequently they recall seeing alcohol marketing, and what factors are associated with higher awareness of alcohol marketing and ownership of alcohol branded merchandise.
- The large sample size supports robust statistical analysis to examine what relationship (if any) there is between alcohol marketing and consumption, controlling for demography and relevant covariates (e.g. peer consumption).
- The study explores the association between alcohol marketing and consumption at three levels: overall alcohol consumption and higher-risk drinking in current drinkers, and susceptibility in never-drinkers.
- The cross-sectional nature of the survey does not enable causal relationships to be drawn about the link between alcohol marketing and either consumption or susceptibility.

**Running head:** Alcohol marketing and consumption in young people in the UK

**1 Awareness of alcohol marketing, ownership of alcohol branded merchandise, and the  
2 association with alcohol consumption, higher-risk drinking, and drinking susceptibility  
3 in adolescents and young adults: A cross-sectional survey in the United Kingdom.**

## 4 5 INTRODUCTION

6 Adolescents and young adults (hereafter ‘young people’, aged 11- 19 years old) are a focal  
7 population for alcohol research because consumption at this stage of development is associated  
8 with increased drinking and risk of concomitant harms in later adulthood [1,2]. Global  
9 estimates indicate that consumption by young people is particularly high in Europe, where the  
10 proportion of current drinkers (69.5%) is higher than the five other global regions, and the  
11 proportion of lifetime abstainers is lower (15.9%) [3]. In England, it is estimated that  
12 approximately half of 11-15-year olds (44%) have consumed an alcoholic drink, one-in-ten  
13 have consumed in the past week, and nine percent have been drunk in the past month [4].  
14 Similar estimates are reported in Scotland and Wales [5,6]. Understanding the drivers of  
15 alcohol consumption in young people is important given the immediate and long-term  
16 individual, social, and economic consequences associated with higher-risk drinking [7].

17 One factor routinely cited as shaping alcohol-related attitudes and behaviours in young  
18 people is marketing [8,9]. Marketing is fundamentally important to alcohol producers. It  
19 represents the primary method of communicating with new and existing consumers, can  
20 directly encourage sales, and can increase brand salience over competitors. Accordingly,  
21 alcohol companies have used highly visible marketing for over 100 years [10], with the current  
22 UK landscape characterised by a complex network of mass media marketing (e.g. television),  
23 alternative marketing (e.g. sponsorship), consumer marketing (e.g. price), and stakeholder  
24 marketing (e.g. to retailers) [9]. The importance of marketing to the alcohol industry is  
25 evidenced through their annual investment, with Diageo’s global marketing expenditure  
26 approximately £1.8 billion [11]. Continued consolidation in the alcohol industry has also seen

**Running head:** Alcohol marketing and consumption in young people in the UK

1  
2  
3 1 the market become dominated by a small number of transnational producers, creating larger  
4  
5 2 marketing budgets, economies of scale, and intense competition [12].  
6

7  
8 3 Content analysis research, which focuses on the marketing output as the unit of analysis,  
9  
10 4 consistently reports that marketing may reach and influence young people. For example,  
11  
12 5 marketing has been reported in media environments where young people may be exposed,  
13  
14 6 including sports [13], social media [14], print media [15], and on-screen [16, 17]. Content  
15  
16 7 research has also found that marketing may appeal to young people through creative designs,  
17  
18 8 use of topical and real-world associations which may resonate with younger audiences, and by  
19  
20 9 promoting positive connotations around consumption (e.g. sociability or desirable lifestyles)  
21  
22 10 [18,19]. It has also been suggested that commercial marketing contains ambiguous messages  
23  
24 11 about lower-risk consumption [20,21].  
25  
26  
27

28  
29 12 Systematic reviews of consumer research, which focus on the individual as the unit of  
30  
31 13 analysis, provide consistent evidence that awareness of, and participation with, marketing has  
32  
33 14 a causal influence on young people's consumption, including initiation and frequency of  
34  
35 15 drinking [22,23]. Qualitative research has also suggested that this relationship is more complex  
36  
37 16 than an 'exposure equals consumption' hypothesis, and that young people consider alcohol  
38  
39 17 marketing and branding to hold rich cultural, social, and symbolic meaning [14,24,25].  
40  
41 18 Accordingly, message interpretation research has attempted to move the debate on from  
42  
43 19 whether marketing is associated with consumption and onto how this influence occurs, by  
44  
45 20 identifying psychological mechanisms which mediate the relationship between exposure and  
46  
47 21 consumption [26,27].  
48  
49

50  
51 22 In the UK, the influence of alcohol marketing on young people has been a topic of debate  
52  
53 23 for decades [9,28]. These debates are further supplemented by concerns about the efficacy and  
54  
55 24 effectiveness of self-regulation, the predominant approach employed to control alcohol  
56  
57 25 marketing in the UK. This includes suggestions that self-regulation provides inadequate  
58  
59  
60

**Running head:** Alcohol marketing and consumption in young people in the UK

1 restrictions, is not consistently enforced or complied with, is retrospective and slow to react to  
2 complaints, lacks meaningful sanctions, and lags behind modern marketing methods [9,28-32].  
3 There are, however, unresolved issues which have inhibited attempts to move the debate  
4 forward. In the UK, the last large-scale assessment of young people's awareness of alcohol  
5 marketing is a decade old, was only conducted in Scotland, only sampled adolescents under  
6 the minimum purchase age, only considered overall marketing awareness (not frequency), and  
7 did not consider higher-risk consumption [33,34].

8 In this study, we explore frequency of awareness for alcohol marketing and ownership of  
9 alcohol branded merchandise in a demographically representative sample of young people in  
10 the UK, including those above and below the legal purchasing age. We also consider what  
11 association (if any) awareness of alcohol marketing and ownership of branded merchandise has  
12 with alcohol consumption and higher-risk drinking in current drinkers, and susceptibility to  
13 drink in never drinkers.

**METHOD****Design and sample**

14  
15  
16  
17 Data come from the 2017 Youth Alcohol Policy Survey, an online cross-sectional survey  
18 conducted with 11-19-year olds in the UK ( $n=3,399$ ). Responses were collected April–May  
19 2017. The survey was hosted by YouGov, a market research company, who recruited a sample  
20 intended to be representative of the UK population from their UK panel [35]. Participants aged  
21 16 or over were approached directly to participate, while those aged under 16 were approached  
22 through existing adult panel members known to have children. A survey weight was provided  
23 for each respondent (based on age, gender, ethnicity, region, and social grade) to enable  
24 descriptive data to be representative of the UK population. The study design was informed by

**Running head:** Alcohol marketing and consumption in young people in the UK

1  
2  
3 1 previous cross-sectional surveys in the UK which have explored young people's experiences  
4  
5 2 of alcohol and tobacco marketing [33,36].  
6  
7  
8 3

**Measures****Demography**

10 4  
11  
12 5  
13  
14 6 Alcohol consumption is not homogeneous among young people in the UK [4-7]. It is therefore  
15  
16 7 important to adjust for demographic variation when examining any factors purported to be  
17  
18 8 associated with consumption. In this study, age, gender, ethnicity, resident country (England,  
19  
20 9 Scotland, Wales, Northern Ireland), living status, employment status, educational status, legal  
21  
22 10 purchasing status for alcohol ( $\geq 18$  years old), and indices of deprivation (IMD), were obtained  
23  
24 11 from information held about panel respondents or survey questions.  
25  
26  
27  
28  
29  
30  
31  
32

**Awareness of alcohol marketing**

33 14 Awareness of alcohol marketing was assessed through structured, self-reported recall, a method  
34  
35 15 frequently used in consumer research [33]. Participants were prompted with the statement  
36  
37 16 '*Over the last month, how often, if at all, have you seen...*' and then presented with descriptions  
38  
39 17 of nine examples of alcohol marketing: (1) newspapers or magazines; (2) television; (3)  
40  
41 18 billboards; (4) radio; (5) adverts on social media (e.g. YouTube, Tumblr, Facebook, SnapChat,  
42  
43 19 Instagram or other social media); (6) famous people in films, music videos or TV or pictured  
44  
45 20 in magazines with alcohol [celebrity endorsement]; (7) sports, games, or events sponsorship;  
46  
47 21 (8) special price offers; and (9) competitions or prize draws. As per recent research [37,38], a  
48  
49 22 Likert scale was used to measure frequency of noticing marketing in the past month for each  
50  
51 23 of the nine examples (1=Everyday – 6=Not in the past month; Not sure).  
52  
53  
54  
55

56 24 In the UK, survey research which has measured awareness of alcohol marketing has  
57  
58 25 typically used dichotomous response options for each channel (e.g. Yes/No) and used a  
59  
60

**Running head:** Alcohol marketing and consumption in young people in the UK

1 summation across these to estimate overall awareness. [33,39]. This method, however, only  
2 provides insight into breadth of marketing awareness across channels, not frequency or volume,  
3 and therefore lacks sensitivity and may underestimate awareness. To enhance accuracy in this  
4 study, the self-reported frequency of awareness for each marketing example was converted into  
5 the estimated number of days that marketing had been seen in a four-week period (i.e. 'one  
6 month'). This timeframe is consistent with previous research [40,41] and is representative of  
7 the minimum number of days in any month. For example, an answer of 'everyday' equated to  
8 28 instances of awareness over four weeks (i.e. seven days per-week multiplied by four) and  
9 1-2 times per-week equated to six instances over four weeks (i.e. 1.5 times per-week multiplied  
10 by four) (see Table 1 for other response options). Scores across the nine channels were summed  
11 to create an aggregate score, providing an approximation of total alcohol marketing awareness  
12 in the past month. Estimating total volume of awareness, as opposed to breadth across channels,  
13 is consistent with other recent alcohol marketing research [42,43].

14 In this study, an aggregate awareness score was only computed when a valid answer  
15 had been given for all nine marketing examples. To provide meaningful interpretative utility,  
16 the aggregate score for the valid sample was split into tertiles of low (aggregate score  $\leq 16$ ;  
17 awareness approximately every other day), medium (17-53; awareness approximately daily),  
18 and high awareness ( $\geq 54$ ; awareness almost twice daily). If a participant answered 'not sure'  
19 to any of the nine channels they were coded as 'not stated' for the aggregate score. Indicating  
20 'not sure' meant that a respondent's potential aggregate score was, by default, more  
21 conservative than those who provided a valid answer to all nine examples. These respondents  
22 were therefore coded as a separate 'not sure' category to avoid biasing the proportion of valid  
23 respondents considered to have low or medium awareness, or what the tertiles boundaries were.

**Ownership of alcohol brand merchandise**



**Running head:** Alcohol marketing and consumption in young people in the UK

1  
2  
3 1 Ownership of alcohol branded merchandise was measured through a single item adapted from  
4  
5 2 previous research [33,44]. Participants were asked '*Do you own any merchandise (such as*  
6  
7 3 *clothing or drinks glasses) that show an alcoholic drink brand or logo?*' (Yes/No/Not sure).  
8  
9 4

**Alcohol consumption status**

10  
11  
12 5  
13  
14 6 Participants were asked '*Have you ever had a whole alcoholic drink? Not just a sip?*' [33,34].  
15  
16  
17 7 Those who answered 'No' were classed as never-drinkers while those who answered 'Yes'  
18  
19 8 were classed as ever-drinkers.  
20  
21 9

**Alcohol consumption and higher-risk drinking**

22  
23  
24 10  
25  
26 11 Alcohol use was measured through the Alcohol Use Disorders Identification Test–  
27  
28 12 Consumption (AUDIT-C), which assessed frequency of consumption, units drunk in a typical  
29  
30 13 drinking occasion, and frequency of heavy episodic drinking. Responses were provided on  
31  
32 14 five-point scales, with the answers for each item relative to frequency (0=Never – 4= Four or  
33  
34 15 more times a week), units drunk (0=1-2 units – 4=10 units or more), or frequency of heavy  
35  
36 16 episodic drinking (0=Never – 4=Daily or almost Daily). Heavy episodic drinking was classified  
37  
38 17 as eight or more units in a single occasion for males, and six or more units for females (one  
39  
40 18 unit=8g or 10ml of alcohol). A diagram depicting the unit content of alcoholic drinks was  
41  
42 19 included to assist calculation of units. Those who answered anything other than 'never' on the  
43  
44 20 first AUDIT-C item were classed as current drinkers and asked to complete the final two items.  
45  
46 21 All other respondents (i.e. those stating 'never' for frequency of consumption) were classified  
47  
48 22 as non-drinkers and were not asked to complete the final two items. In current drinkers, a total  
49  
50 23 AUDIT-C score was computed by summing the three AUDIT-C items (0-12), with a cut-off of  
51  
52 24  $\geq 5$  used to identify higher-risk consumption [45].  
53  
54  
55  
56  
57  
58  
59  
60



**Running head:** Alcohol marketing and consumption in young people in the UK

## 1 Susceptibility

2 As per tobacco research, susceptibility was defined as the absence of a firm decision not to  
3 drink alcohol in the next year [36]. Never-drinkers were classified as ‘non-susceptible’ if they  
4 answered ‘definitely no’ to the question ‘*Do you think you will drink alcohol at any time during*  
5 *the next year?*’ Those who answered anything other than ‘Definitely no’ were classified as  
6 Susceptible.

## 8 Confounding variables

9 Confounding factors, reported to influence consumption in young people and used in previous  
10 alcohol marketing research, were included as covariates to contextualise any association  
11 between marketing and consumption [33,34,46,47]. Frequency of consumption was measured  
12 for the mother (female carer), father (male carer), and closest friend (each scored: 1=Never –  
13 9=Every day or almost every day; Prefer not to say; Not applicable). For all three groups,  
14 consumption was collapsed into five categories (Never, Less than monthly, Monthly or  
15 Fortnightly, At Least weekly, and Not Stated). Perceived acceptability of consumption was  
16 measured for parents and peers (each scored: 1=Total acceptable – 5=Totally unacceptable).  
17 For both groups, acceptability was converted into dichotomous categories (‘Neutral or  
18 unacceptable’ and ‘Acceptable’). For ever drinkers, age of first drink was also measured ( $\leq 8$   
19 years old – 19 years old; Can’t remember; Prefer not to say). Answers were converted into  
20 three categories ( $\leq 13$  years; 14-15 years;  $\geq 16$  years).

## 22 Ethics

23 Ethical approval was obtained from the University of Stirling’s General University Ethics  
24 Panel (GUEP59). YouGov included a lead for ethical and quality assurance, including consent,

**Running head:** Alcohol marketing and consumption in young people in the UK

1  
2  
3 1 post-survey debriefing and signposting to support organisations, and confidentiality and  
4  
5 2 anonymity.

6  
7  
8  
9  
10 4 **Patient and Public Involvement**

11  
12 5 The survey was developed following cognitive testing with a small sample ( $n=100$ ) of young  
13  
14 6 people to ensure age and cultural comprehension of the questions. Beyond this, no other patient  
15  
16 7 or public involvement was undertaken.

17  
18  
19  
20  
21 9 **Analysis**

22  
23  
24 10 Data were analysed using SPSS version 23 (SPSS Inc., Chicago IL). Descriptive data were  
25  
26 11 weighted so that percentages and median scores were representative of the demographic profile  
27  
28 12 of the UK population. Bivariate analyses, using Chi-square tests, examined differences in level  
29  
30 13 of alcohol marketing awareness and ownership of branded merchandise between the  
31  
32 14 demographic and confounding variables.

33  
34  
35 15 A multivariate linear regression was conducted with current drinkers' AUDIT-C score  
36  
37 16 as the dependent variable (0-12) and awareness of marketing and ownership of branded  
38  
39 17 merchandise as the key independent variables. The following demographic and confounding  
40  
41 18 variables were also included in initial blocks: age; gender; ethnicity; IMD quintile; resident  
42  
43 19 country; educational status; working status; living status; frequency of mother (female carer),  
44  
45 20 father (male carer) and close friend drinking; perceived parental and peer acceptability of  
46  
47 21 consumption; and drink age of first drink. Categorical variables with  $\geq 3$  categories were  
48  
49 22 converted into dummy (binary) variables to aid interpretation and comparison. The omitted  
50  
51 23 dummy variable formed the reference category. For example, marketing awareness was a  
52  
53 24 categorical variable with four levels: low, medium, high, and not stated. Four binary variables  
54  
55 25 were computed: low awareness, medium awareness, high awareness, and not stated (each  
56  
57  
58  
59  
60

**Running head:** Alcohol marketing and consumption in young people in the UK

1 coded Yes=1, No=0). By including medium, high and not stated in the multivariate analysis,  
2 and omitting low awareness, the reference category was low awareness. The multivariate  
3 regressions therefore indicate the association between level of consumption and medium  
4 awareness, relative to low awareness, and high awareness relative to low awareness. Reference  
5 categories for each variable are displayed in the results.

6 Two multivariate logistic regressions were conducted with higher-risk drinking  
7 (AUDIT-C  $\geq 5$ ) among current drinkers and susceptibility to drink among never-drinkers as the  
8 dependent variables. Marketing awareness and ownership of branded merchandise were the  
9 key independent variables. Where applicable, both logistic regressions controlled for the same  
10 demographic and confounding variables as the linear regression. Reference categories for  
11 categorical independent variables are indicated in the results. Where the categorical variables  
12 had three  $\geq 3$  levels, and were of an ordinal level, the SPSS contrast=difference function enabled  
13 comparison of each increasing category relative to the combined previous categories. For  
14 example, the first comparison with frequency of mother's drinking and higher-risk drinking  
15 was 'less than monthly drinking' vs. 'mother never drinks', whereas the final comparison was  
16 'at least weekly drinking' vs. 'less often'. As the independent variables were categorical, 'not  
17 stated' responses were also included as a separate category and compared against the reference  
18 category for each variable. This enabled the maximum sample to be retained. For example, the  
19 large number of 'not stated' responses on level of marketing awareness could be compared  
20 with those for whom marketing awareness could be computed.

21 All multivariate analyses were conducted on unweighted data as the factors used to  
22 construct the weights were included as covariates in the models. The multivariate analyses were  
23 repeated on weighted data to check for consistency. As results for the key independent variables  
24 (marketing awareness and ownership of branded merchandise) were consistent, only the  
25 unweighted results are presented.

**Running head:** Alcohol marketing and consumption in young people in the UK

1

2  
3  
4  
5 **RESULTS**6  
7 **Sample characteristics**8  
9  
10  
11  
12  
13  
14  
15  
16  
17  
18  
19  
20  
21  
22  
23  
24  
25  
26  
27  
28  
29  
30  
31  
32  
33  
34  
35  
36  
37  
38  
39  
40  
41  
42  
43  
44  
45  
46  
47  
48  
49  
50  
51  
52  
53  
54  
55  
56  
57  
58  
59  
60  
The weighted sample ( $n=3,399$ ) had an average age of 15.18 years old ( $SD=2.55$ ; range: 11-19), with three quarters (76%) below the legal purchasing age ( $\leq 18$  years). There was an even distribution for gender (51% male and 49% female). The majority of the sample were White British (76%) and were evenly distributed across IMD (20% in each quintile). Most participants lived in England (84%) with the remainder from Scotland (8%), Wales (5%), and Northern Ireland (3%). Almost all participants were living at home with parent(s) or other adult family members (90%) and were in some form of education (95%).12 **Alcohol consumption and susceptibility**13  
14  
15  
16  
17  
18  
19  
20  
21  
22  
23  
24  
25  
26  
27  
28  
29  
30  
31  
32  
33  
34  
35  
36  
37  
38  
39  
40  
41  
42  
43  
44  
45  
46  
47  
48  
49  
50  
51  
52  
53  
54  
55  
56  
57  
58  
59  
60  
After excluding cases with missing data on drinking status ( $n=62$ , weighted), almost half of the weighted sample (48%;  $n=1,590$ ) were current drinkers. Within current drinkers, the average AUDIT-C score was 4.33 ( $SD=2.77$ ). Almost half of current drinkers (44%;  $n=707$ ) were classified as higher-risk ( $\geq 5$  AUDIT-C). After excluding cases with missing data on drinking status ( $n=62$ , weighted), almost half of the weighted sample (49%;  $n=1,623$ ) were never drinkers. Within never drinkers, half were classified as susceptible (52%;  $n=841$ ).20 **Awareness of alcohol marketing**21  
22  
23  
24  
25  
26  
27  
28  
29  
30  
31  
32  
33  
34  
35  
36  
37  
38  
39  
40  
41  
42  
43  
44  
45  
46  
47  
48  
49  
50  
51  
52  
53  
54  
55  
56  
57  
58  
59  
60  
The most frequent sources of marketing awareness in the past month were adverts on television (Median=6 instances per month, Inter quartile range=14), celebrity endorsement (Median=6, IQR=14), and special offers (Median=6, IQR=14) (Table 1). More than a third of respondents (range: 39-43%) had noticed marketing through these channels at least weekly. Billboard adverts (Median=2 instances per month, IQR=6), sponsorship (Median=2, IQR=6), and social

**Running head:** Alcohol marketing and consumption in young people in the UK

1  
2  
3 1 media adverts (Median=2, IQR=6) were noticed less than once a week, with at least a quarter  
4  
5 2 of participants (range: 27-31%) having noticed these at least weekly. Lowest awareness was  
6  
7 3 for adverts in the print press (Median=0 instances per month, IQR=6), on radio (Median=0,  
8  
9 4 IQR=0), and competitions (Median=0, IQR=2). For each marketing example, a fifth or more  
10  
11 5 (range: 19-29%) were not sure how often, if at all, they had come across alcohol marketing.  
12  
13 6 Overall, 82% had noticed marketing through at least one channel.  
14  
15  
16  
17  
18

19 8 [TABLE 1]  
20  
21  
22  
23  
24

**Aggregate alcohol marketing awareness**

25  
26 11 The median aggregate alcohol marketing awareness score was 32 (IQR=60), equating to  
27  
28 12 noticing 32 instances of alcohol marketing in the past month (under minimum purchase age:  
29  
30 13 median=28; IQR=60). When categorised into tertiles, 35% of the valid sample were classified  
31  
32 14 as having low awareness ( $\leq 16$  instances per month), 32% had medium awareness (17–53), and  
33  
34 15 34% had high awareness ( $\geq 54$ ). In those under the minimum purchase age, 38% had low  
35  
36 16 awareness, 31% medium, and 32% high.  
37  
38  
39

40 17 Bivariate Chi-square tests found that higher awareness of alcohol marketing was  
41  
42 18 significantly associated with being male, of legal purchasing age, a current drinker, a higher-  
43  
44 19 risk drinker, not in education, in employment, and perceiving that parents and peers would  
45  
46 20 consider it okay to consume (Table 2). Higher awareness was also associated with greater  
47  
48 21 frequency of mother (female carer) consumption,  $\chi^2(16)=38.25$ ,  $p<0.001$ , greater frequency of  
49  
50 22 father (male carer) consumption,  $\chi^2(16)=29.55$ ,  $p<0.05$ , and greater frequency of close friends  
51  
52 23 drinking,  $\chi^2(16)=198.51$ ,  $p<0.001$ . There was no difference in awareness by ethnicity, IMD  
53  
54 24 quintile, or resident country.  
55  
56  
57  
58  
59  
60

**Running head:** Alcohol marketing and consumption in young people in the UK1  
2  
3 [TABLE 2]  
45  
6 27  
8 **Owning alcohol branded merchandise**  
9

10 Almost a fifth of participants (17%) reported owning alcohol branded merchandise. Bivariate  
11 Chi-square tests found that ownership of branded merchandise was significantly associated  
12 with being of white British ethnicity, of legal purchase age, a current drinker, a higher-risk  
13 drinker, not in education, in employment, and perceiving that parents and peers would consider  
14 it okay to consume (Table 3). Ownership of branded merchandise was also associated with  
15 greater frequency of mother (female carer) consumption,  $\chi^2(8)=44.11$ ,  $p<0.001$ , greater  
16 frequency of father (male carer) consumption,  $\chi^2(8)=56.49$ ,  $p<0.001$ , and greater frequency of  
17 close friends drinking,  $\chi^2(8)=178.76$ ,  $p<0.001$ . There was also an overall effect of IMD,  
18  $\chi^2(4)=15.73$ ,  $p<0.01$ , although this had no distinct pattern across escalating deprivation. There  
19 was no difference by resident country or gender.  
20  
21  
22  
23  
24  
25  
26  
27  
28  
29  
30  
31  
32  
33  
34

35 [TABLE 3]  
36  
37  
38  
3940 **Association between alcohol marketing and AUDIT-C scoring**  
41

42 A multivariate linear regression examined the association between marketing awareness,  
43 ownership of branded merchandise, and AUDIT-C scoring in current drinkers (Table 4). After  
44 controlling for demographic and confounding factors, medium alcohol marketing awareness  
45 ( $b=0.79$ , 95% CI: 0.37-1.21,  $p<0.001$ ), or high awareness ( $b=0.85$ , 95% CI: 0.44-1.26,  
46  $p<0.001$ ), compared to low awareness, was associated with higher AUDIT-C score, as was  
47 ownership of branded merchandise ( $b=0.79$ , 95% CI: 0.55-1.04,  $p<0.001$ ). Of the demographic  
48 variables, being older ( $p<0.001$ ), male ( $p=0.006$ ), from a more affluent IMD ( $p<0.01$ ), in  
49 education ( $p<0.01$ ), and living independently of parents or adult family members ( $p<0.001$ )  
50  
51  
52  
53  
54  
55  
56  
57  
58  
59  
60

**Running head:** Alcohol marketing and consumption in young people in the UK

1 was also associated with higher AUDIT-C score in the final model. Of the confounding variables, having a close friend who drinks at least weekly ( $p<0.001$ ), and perceiving that parents consider it acceptable to consume ( $p<0.05$ ) was also associated with higher AUDIT-C score. Having a first alcoholic drink at  $\geq 16$  years old ( $p<0.001$ ) was associated with lower AUDIT-C score, compared with those who first drank aged 14–15 years.

[TABLE 4]

**Association between alcohol marketing and higher-risk consumption**

A multivariate logistic regression examined the association between marketing awareness, ownership of branded merchandise, and higher-risk drinking in current drinkers (Table 5). After controlling for demographic and confounding factors, medium alcohol marketing awareness (Adjusted Odds Ratio=2.18, 95% CI: 1.39-3.42,  $p<0.001$ ), high awareness (AOR=1.43, 95% CI: 1.01-2.02,  $p<0.05$ ), and owning branded merchandise (AOR=1.71, 95% CI: 1.31-2.22,  $p<0.001$ ) were associated with higher-risk drinking. Of the demographic variables, being older ( $p<0.001$ ), male ( $p<0.05$ ), from England compared to Wales ( $p<0.05$ ), in education ( $p<0.05$ ), and living independently ( $p<0.05$ ) was associated with higher-risk drinking in the final model. Of the confounding variables, increasing frequency of close friend consumption ( $p<0.001$ ), and having had first drink aged 14-15 years old or younger ( $p<0.001$ ), was associated with higher-risk consumption.

[TABLE 5]

**Association between alcohol marketing and susceptibility to consume**

**Running head:** Alcohol marketing and consumption in young people in the UK

1 A multivariate logistic regression examined the association between marketing awareness,  
2 ownership of branded merchandise, and susceptibility to drink in never drinkers (Table 6).  
3 After controlling for demographic and confounding variables, awareness of alcohol marketing  
4 was not associated with susceptibility, but ownership of branded merchandise was, with those  
5 who owned branded merchandise almost twice as likely to be susceptible compared to those  
6 who did not (AOR=1.98, 95% CI: 1.20-3.24,  $p<0.01$ ). Of the demographic variables, only  
7 being white British ( $p<0.01$ ) was associated with susceptibility in the final model. Of the  
8 confounding variables, frequency of mother (female carer) consumption ( $p<0.001$ ), frequency  
9 of father (male carer) consumption ( $p<0.05$ ), frequency of close friend consumption ( $p<0.001$ ),  
10 and perceived peer approval ( $p<0.001$ ) were associated with susceptibility.

11  
12 [TABLE 6]

**DISCUSSION**

15 The findings indicate that young people in the UK are aware of a variety of alcohol marketing  
16 and almost a fifth own branded merchandise. The results also show that awareness of marketing  
17 and ownership of branded merchandise is associated with increased consumption and higher-  
18 risk drinking in current drinkers, and that ownership of branded merchandise is associated with  
19 susceptibility in never-drinkers. We address key evidence gaps in the UK by exploring  
20 frequency of marketing awareness (not just breadth of exposure) and demonstrating an  
21 association between marketing and both consumption and susceptibility in young people above  
22 and below the legal purchasing age from across the UK.

23 The findings are consistent with suggestions that alcohol marketing appears in contexts  
24 which may reach young people, including those under the legal purchasing age [8,9].  
25 Awareness included mass media marketing (e.g. television), alternative marketing (e.g.



**Running head:** Alcohol marketing and consumption in young people in the UK

1 sponsorship and celebrity endorsement), consumer marketing (e.g. price offers), and digital  
2 media. This highlights the dynamic nature of ‘360-degree’ marketing strategies and how they  
3 reach young people in offline and online environments [9,48]. The results extend understanding  
4 by showing how frequently young people see alcohol marketing; with at least one-in-ten  
5 reporting daily or almost daily awareness through three of the nine marketing examples.  
6 Approximately half of the sample had seen at least 32 instances of alcohol marketing per  
7 month, which equates to awareness at least once a day. Although there were expected  
8 differences in awareness between drinkers and never-drinkers [33,49], there were no  
9 differences between key demographic groups, including ethnicity, indices of deprivation, and  
10 resident country. This suggests that awareness of alcohol marketing occurs in young people  
11 across the UK, and is not isolated to a minority of demographic groups.

12 The results are consistent with longitudinal research which has shown a link between  
13 marketing and increased consumption in young people [22,23,34,38]. Although marketing  
14 awareness did not have an association with susceptibility in never-drinkers, ownership of  
15 branded merchandise did. Research has reported that participation with marketing has a  
16 stronger association with consumption than awareness [33,34,39,49]. Our findings therefore  
17 suggest that the effect of participation is pronounced in never-drinkers. Nevertheless, as  
18 research suggests that not all alcohol marketing or brands are equally appealing to youth  
19 [25,50], it is possible that focusing on aggregated alcohol marketing awareness (the approach  
20 in this study) may have disguised associations between individual examples of marketing and  
21 susceptibility in never drinkers. The findings also extend understanding by showing an  
22 association between marketing and consumption across young adulthood. This includes an  
23 association with susceptibility and consumption in young people under the legal purchasing  
24 age and higher-risk drinking in newly-legal drinkers. Newly legal drinkers are an important  
25 target for alcohol marketers [18] and are a key under-researched group [51]. The findings

**Running head:** Alcohol marketing and consumption in young people in the UK

1  
2  
3 therefore highlight the importance of considering the wider role that marketing plays on  
4  
5  
6 consumption, not just in those under the purchasing age.

7  
8 Except for the Scottish Government's decision to implement minimum unit pricing  
9  
10 [52], there has been little recent change to the UK's self-and-co-regulatory framework for  
11  
12 alcohol marketing [53,54]. It is claimed that such self-regulatory approaches provide  
13  
14 inadequate restrictions, are not suitably enforced, are retrospective and slow to react to  
15  
16 complaints, and lack meaningful sanctions [9,28-32]. Although statutory regulations are cited  
17  
18 as an alternative approach [28], studies have also questioned whether current examples, such  
19  
20 as the Loi Évin in France, are being enforced properly or whether they reduce marketing  
21  
22 exposure [13,37]. Further research exploring the perspectives of stakeholders involved in the  
23  
24 production, research, consumption, and regulation of marketing would be of value to identify  
25  
26 feasible and effective options to reduce youth exposure and form a consensus on appropriate  
27  
28 action [55,56].  
29  
30  
31  
32

33  
34 There are limitations. First, the cross-sectional design cannot identify a causal  
35  
36 relationship between marketing and consumption, albeit a directional effect is supported by  
37  
38 longitudinal research [22,23]. Moreover, that marketing had any association with consumption  
39  
40 and susceptibility at all suggests that it must at least play either an initiating or reinforcing role.  
41  
42 Second, the results are only partially representative of young adults above the legal purchasing  
43  
44 age, albeit other research has shown similar trends in older young adults [39]. Third, the  
45  
46 marketing channels measured are not exhaustive and, consequently, the results may  
47  
48 underestimate awareness. Examples of omitted marketing include packaging, cinema, product  
49  
50 placement, and a broader range of digital marketing [33,39,49]. It was also not possible to  
51  
52 decipher whether 'not sure' responses indicated uncertainty over whether a participant had seen  
53  
54 alcohol marketed at all through a channel or uncertainty on the frequency of awareness. This  
55  
56 influenced the design of the regression models (to account for a 'Not sure' category). Third,  
57  
58  
59  
60

**Running head:** Alcohol marketing and consumption in young people in the UK

1  
2  
3 1 except for owning branded merchandise, the study only measured awareness of marketing, but  
4  
5 2 not participation. As participation is reported to have a stronger effect [34,49], the results may  
6  
7 3 underestimate the association between marketing and drinking outcomes. Finally,  
8  
9 4 measurement of owning branded merchandise also only included two examples as prompts  
10  
11 5 (clothing and drinks glasses). It is possible that different prompts may have altered recall, and  
12  
13 6 that multiple items or a free text response option would have provided greater clarity on  
14  
15 7 merchandise owned.  
16  
17  
18  
19  
20  
21  
22

**CONCLUSION**

23  
24 10 This paper makes important contributions to understanding by exploring awareness of alcohol  
25  
26 11 marketing and ownership of branded merchandise by young people from across the UK, three  
27  
28 12 quarters of who were under the legal purchasing age. The results highlight that ‘360-degree’  
29  
30 13 marketing strategies have created several avenues for young people to be exposed to, or  
31  
32 14 involved with, alcohol marketing, and that this is associated with consumption and higher-risk  
33  
34 15 drinking in current drinkers and susceptibility in never drinkers. Further scrutiny and  
35  
36 16 examination of the UK’s self-regulatory approach, and viable alternatives, is needed to identify  
37  
38 17 feasible, appropriate, and effective means of reducing marketing exposure in young people.  
39  
40  
41  
42  
43  
44

45 19 **Author contribution statement:** LH, CT, and JV led on study design and data acquisition.  
46  
47 20 LH, CT, JV were involved in design of the study tools with support from AMM. NC and AMM  
48  
49 21 planned the analysis, and this was conducted by AMM. NC and AMM led on interpretation of  
50  
51 22 the results, with input from LH, CT, and JV. NC drafted the manuscript, with support from  
52  
53 23 AMM on methods and results, and all authors provided feedback and approved the final version  
54  
55 24 of the manuscript.  
56  
57  
58  
59  
60

**Running head:** Alcohol marketing and consumption in young people in the UK

1  
2  
3 1 **Acknowledgements:** The authors thank YouGov for their assistance in preparing and  
4  
5 2 managing delivery of the survey and data. We thank Gillian Rosenberg from the CPRC at  
6  
7 3 Cancer Research UK for her role in managing the project and providing information on  
8  
9 4 YouGov fieldwork. We also thank NatCen Social Research for their contribution to the original  
10  
11 5 scoping studies used in the development of this project.  
12  
13  
14  
15  
16

17 7 **Funding:** This work was supported by a grant from Cancer Research UK (1107098).  
18  
19  
20  
21  
22

23 9 **Declaration of interest:** Nathan Critchlow is a board member of Alcohol Focus Scotland. All  
24  
25 10 other authors have no conflict of interest to declare.  
26  
27  
28  
29  
30

31 12 **Data sharing statement:** The raw data (deidentified participant survey responses) from the  
32  
33 13 Youth Alcohol Policy is held by the Cancer Policy Research Centre at Cancer Research UK.  
34  
35  
36  
37  
38  
39  
40  
41  
42  
43  
44  
45  
46  
47  
48  
49  
50  
51  
52  
53  
54  
55  
56  
57  
58  
59  
60

**Running head:** Alcohol marketing and consumption in young people in the UK

## 1 REFERENCES

- 1 1. Newbury-Birch D, Walker J, Avery L, *et al.* *Impact of alcohol consumption on young*  
2 *people: A systematic review of published reviews*, London: Department for Children,  
3 Schools and Family, 2009.
- 4 2. McCambridge J, McAlaney K, Rowe R. Adult consequences of late adolescent alcohol  
5 consumption: A systematic review of cohort studies. *PloS Medicine*  
6 2011;8(2):e1000413.
- 7 3. World Health Organisation. *Global status report on alcohol and health 2014*. Geneva:  
8 World Health Organisation, 2014.
- 9 4. National Health Service Digital. *Smoking, drinking, and drug use among young people:*  
10 *England, 2016*. London: Health and Social Care Information Service, 2017.
- 11 5. Public Health Wales Observatory. *Alcohol and health in Wales 2014: Wales profile*.  
12 Cardiff: Public Health Wales Observatory, 2014.
- 13 6. Scottish Government. *Scottish Schools Adolescent Lifestyle and Substance Use Survey*  
14 *(SALSUS): Alcohol report (2015)*. Edinburgh: Scottish Government, 2016.
- 15 7. Public Health England. *The public health burden of alcohol and the effectiveness and*  
16 *cost-effectiveness of alcohol control policies: An evidence review*. London: Public  
17 Health England, 2016.
- 18 8. Hastings G. Alcohol marketing: Grooming the next generation. *BMJ*;346:f1227.
- 19 9. Alcohol Focus Scotland. Alcohol Focus Scotland. Glasgow: Alcohol Focus Scotland,  
20 2017.
- 21 10. Dade P. *Drink talking: 100 years of alcohol advertising*, Middlesex: Middlesex  
22 University Press, 2008.
- 23 11. Diageo. *Annual report, 2017*. London: Diageo PLC, 2017.

**Running head:** Alcohol marketing and consumption in young people in the UK

12. Collin J, Hill SE, Smith KE. Merging alcohol giants threaten global health. *BMJ* 2015;17(351):h6087.
13. Purves, RI, Critchlow N, Stead M *et al.* Alcohol marketing during the UEFA EURO 2016 football tournament: A frequency analysis. *Int J Environ Res Public Health* 2017;14(7):e704.
14. Atkinson AM, Ross-Houle KM, Begley E, *et al.* An exploration of alcohol advertising on social networking sites: An analysis of content, interactions and young people's perspectives. *Add Res Theory* 2016;25(2)91-102.
15. King C, Sigel M, Ross CS, *et al.* Alcohol advertising in magazines and underage readership: Are underage youth disproportionality exposed? *Alcohol: Clin Exp Res* 2017;41(1):1775-1782.
16. Thompson KM. Addiction media: Substances on screen. *Child Adolesc Psychiatr Clin N Am* 2005;14:473-489.
17. Lowe E, Britton J, Cranwell J. Alcohol content in the 'hyper reality' MTV show 'Geordie Shore'. *Alcohol Alcohol* 2018;53(1):337-343.
18. Hastings G, Brooks O, Stead M, *et al.* "They'll drink bucket loads of the stuff": An analysis of internal alcohol industry advertising documents. London: Alcohol Education Research Council, 2010.
19. Rhoades E, Jernigan DH. Risky messages in alcohol advertising, 2003-2007: results from content analysis. *J Adolesc Health* 2013;52(1):1116-121.
20. Jones, SC, Hall S, Kypri K. Should I drink responsibly, safely or properly? Confusing messages about reducing alcohol-related harm. *PLoS One* 2017;12(9):e0184705.
21. Smith SW, Atkin CK, Roznowski J. Are "drink responsibly" alcohol campaigns strategically ambiguous? *Health Commun.* 2006;20(1):1-11.

**Running head:** Alcohol marketing and consumption in young people in the UK

- 1  
2  
3 1 22. Anderson P, de Bruijn A, Angus K, *et al.* Impact of alcohol advertising and media  
4 exposure on adolescent alcohol use: A systematic review of longitudinal studies.  
5  
6 2  
7  
8 3  
9  
10 4 23. Jernigan DH, Noel J, Landon J, *et al.* Alcohol marketing and youth alcohol  
11 consumption: A systematic review of longitudinal studies published since 2008.  
12  
13 5  
14 6  
15 6  
16  
17 7 24. Morey Y, Eadie D, Purves RI, *et al.* *Youth engagement with alcohol brands in the UK*,  
18 London: Cancer Research UK, 2017.  
19  
20 8  
21 9 25. Purves RI, Stead M, Eadie D. “I wouldn’t be friends with some if they were liking too  
22 much rubbish”: A qualitative study of alcohol brands, youth identify, and social media.  
23  
24 10  
25  
26 11  
27  
28 12 26. Austin EW, Knaus C. Predicting the potential for risky behaviour among those “too  
29 young” to drink as the result of appealing advertising. *J Health Commun.* 2000;5(1):13-  
30  
31 13  
32  
33 14  
34  
35 15 27. McClure AC, Stoolmiller M, Tanski SE, *et al.* Alcohol marketing receptivity,  
36 marketing-specific cognitions and underage binge drinking. *Alcohol Clin Exp Res*  
37  
38 16  
39  
40 17  
41  
42 18 28. Alcohol Health Alliance. *Health First: An evidence-based alcohol strategy for the UK*.  
43 Stirling: University of Stirling, 2013.  
44  
45 19  
46  
47 20 29. Noel JK, Babor TF, Does industry self-regulation protect young from exposure to  
48 alcohol marketing? A review of compliance and compliant studies. *Addiction*  
49  
50 21  
51  
52 22  
53  
54 23 30. Noel JK, Babor TF, Robaina K. Industry self-regulation of alcohol marketing: A  
55 systematic review of content and exposure research. *Addiction* 2017; 112(S1):28-50.  
56  
57  
58  
59  
60



**Running head:** Alcohol marketing and consumption in young people in the UK

- 1  
2  
3 1 31. Alcohol Concern and Alcohol Research UK. *Fit for purpose?* An analysis of the role  
4 of the Portman Group in alcohol industry self-regulation. London: Alcohol Concern  
5 and Alcohol Research UK, 2018.  
6  
7  
8 2  
9 3  
10 4 32. Hastings G, Brooks O, Stead M, *et al.* (2010). Failure of self-regulation of UK alcohol  
11 advertising. *BMJ* 2010;340:b5650.  
12  
13 5  
14 6 33. Gordon R, Harris F, MacKintosh AM, *et al.* Assessing the cumulative impact of alcohol  
15 marketing on young people's drinking: Cross-sectional data findings. *Addict Res*  
16  
17 7  
18 8  
19 9 34. Gordon R., MacKintosh AM., Moodie C. The impact of alcohol marketing on youth  
20 drinking behaviour: A two stage cohort study. *Alcohol Alcohol* 2010;45(5):470-480.  
21  
22 10  
23 11 35. YouGov. *Panel methodology*. Available from: [https://yougov.co.uk/about/panel-](https://yougov.co.uk/about/panel-methodology/)  
24  
25 12  
26 13 36. Ford A, MacKintosh AM, Moodie C, *et al.* Cigarette pack design and adolescent  
27 smoking susceptibility: a cross-sectional survey. *BMJ Open* 2013;3:e003282.  
28  
29 14  
30 15 37. Gallopel-Morvan K, Spilka S, Mutatayi C, *et al.* France's Évin law on the control of  
31 alcohol advertising: Content, effectiveness, and limitations. *Addiction*  
32  
33 16  
34 17 2017;112(S1):86-93.  
35  
36 18 38. de Bruijn A, Tanghe J, de Leeuw R, *et al.* European longitudinal study on the  
37 relationship between adolescents' alcohol marketing exposure and alcohol use.  
38  
39 19  
40 20 39. Critchlow N, Moodie C, Bauld L, *et al.* Awareness of, and participation with, digital  
41 alcohol marketing, and the association with frequency of high episodic drinking among  
42  
43 21  
44 22 40. Synder LB, Fleming F, Slater M, *et al.* Effects of alcohol advertising exposure on  
45 drinking among youth. *Arch Pediatr Adolesc Med.* 2006;160(1):18-24.  
46  
47  
48  
49  
50  
51  
52  
53  
54  
55  
56  
57  
58  
59  
60



**Running head:** Alcohol marketing and consumption in young people in the UK

- 1  
2  
3 1 41. Siegel M, Kurland RP, Castrini M, *et al.* Potential youth exposure to alcohol advertising  
4  
5 2 on the internet: A study of internet version of popular television programmes. *J Subs*  
6  
7 3 *Use* 2016;21(4): 361-367.  
8  
9  
10 4 42. Collins RL, Martino SC, Kovalchik SA, *et al.* Alcohol advertising exposure among  
11  
12 5 middle school-age youth: An assessment across all media and venues. *J Stud Alcohol*  
13  
14 6 *Drugs* 2016;77(3):384-392.  
15  
16  
17 7 43. Chambers T, Stanley J, Signal L, *et al.* Quantifying the nature and extent of children's  
18  
19 8 real-time exposure to alcohol marketing in their everyday lives using wearable cameras:  
20  
21 9 Children's exposure via a range of media in a range of key places. *Alcohol Alcohol*  
22  
23 10 2018;53(5):626-633.  
24  
25  
26 11 44. Jones SC. Alcohol-branded merchandise ownership and drinking. *Pediatrics*  
27  
28 12 2016;137(5):1-12.  
29  
30  
31 13 45. Research in Practice. *Scoring standardised measures – All measures and guidance.*  
32  
33 14 Available from: [https://www.rip.org.uk/resources/publications/practice-tools-and-](https://www.rip.org.uk/resources/publications/practice-tools-and-guides/scoring-standardised-measures--all-measures-and-guidance-compilation-2015/)  
34  
35 15 [guides/scoring-standardised-measures--all-measures-and-guidance-compilation-2015/](https://www.rip.org.uk/resources/publications/practice-tools-and-guides/scoring-standardised-measures--all-measures-and-guidance-compilation-2015/)  
36  
37 16 [accessed 6<sup>th</sup> June 2018].  
38  
39  
40 17 46. Rossow I, Keating P, Felix L, McCambridge J. Does parental drinking influence  
41  
42 18 children's drinking? A systematic review of prospective cohort studies. *Addiction*  
43  
44 19 2016;111(2):204-217.  
45  
46  
47 20 47. Leung RK, Toumbourou JW, Hemphill SA. The effect of peer influence and selection  
48  
49 21 processes on adolescent alcohol use: A systematic review of longitudinal studies.  
50  
51 22 *Health Psychol Rev* 2014;8(4):426-457.  
52  
53  
54 23 48. Chester J, Montgomery K, Dorfman L. *Alcohol marketing in the digital age.* Berkley,  
55  
56 24 CA: Berkley Media Studies Group, 2010.  
57  
58  
59  
60

**Running head:** Alcohol marketing and consumption in young people in the UK

- 1  
2  
3 1 49. Lin E-Y, Casswell S, You RQ, Huckle T. Engagement with alcohol marketing and early  
4 brand allegiance in relation to early years of drinking. *Addict Res Theory*  
5 2  
6 brand allegiance in relation to early years of drinking. *Addict Res Theory*  
7 3  
8 2012;20(4):329-338.  
9  
10 4 50. Padon AA, Rimal, DeJong W, *et al.* Assessing youth-appealing content in alcohol  
11 advertisements: Application of a content appealing to youth (CAY) index. *Health*  
12 5  
13 *Commun.* 2018;32(2):164-173.  
14 6  
15 51. Meier PS. Alcohol marketing research: The need for a new agenda. *Addiction*  
16 7  
17 2011;106(3):466-471.  
18 8  
19 52. Holmes J, Meier PS, Angus C, *et al.* Scotland's policy on minimum unit pricing for  
20 9  
21 alcohol: The legal barriers are gone so what are the implications for implementation  
22 10  
23 and evaluation? *Addiction* 2018;113(2):203-204.  
24 11  
25 53. Advertising Standards Authority. *Committee of Advertising Practitioners Code*  
26 12  
27 *(Broadcast): 18, Alcohol*, London: Advertising Standards Authority, 2018.  
28 13  
29 54. Portman Group. *Code of practice on the naming, packaging, and promotion of*  
30 14  
31 *alcoholic drinks* (5<sup>th</sup> Edition). London: The Portman Group, 2015.  
32 15  
33 55. Fogarty AS, Chapman S. What should be done about policy on alcohol pricing and  
34 16  
35 promotions? Australians experts' views of policy priorities: A qualitative interviews  
36 17  
37 study. *BMC Public Health* 2013;13:610.  
38 18  
39 56. Morey Y, Eadie D, Purves RI, *et al.* *Specialist views of alcohol marketing regulation*  
40 19  
41 *in the UK*, London: Cancer Research UK, 2017.  
42 20  
43  
44  
45  
46  
47  
48  
49  
50  
51  
52  
53  
54  
55  
56  
57  
58  
59  
60

**Running head:** Alcohol marketing and consumption in young people in the UK**Table 1.** Awareness of alcohol marketing in the past month for young people in the UK

|                                                                                   | Every day<br>[28] <sup>1</sup> | 5-6 times<br>per week<br>[22] <sup>1</sup> | 3-4 times<br>per week<br>[14] <sup>1</sup> | 1-2 times<br>per week<br>[6] <sup>1</sup> | Less than<br>once a week<br>[2] <sup>1</sup> | Not in the<br>last month<br>[0] <sup>1</sup> | Not<br>sure | Seen<br>at<br>least<br>weekly | Median<br>Score<br>(IQR) <sup>2</sup> |
|-----------------------------------------------------------------------------------|--------------------------------|--------------------------------------------|--------------------------------------------|-------------------------------------------|----------------------------------------------|----------------------------------------------|-------------|-------------------------------|---------------------------------------|
| Marketing channel                                                                 | %                              | %                                          | %                                          | %                                         | %                                            | %                                            | %           | %                             |                                       |
| Adverts for alcohol                                                               |                                |                                            |                                            |                                           |                                              |                                              |             |                               |                                       |
| ... in newspapers or magazines                                                    | 1.9                            | 1.8                                        | 4.9                                        | 10.2                                      | 12.2                                         | 42.3                                         | 26.8        | 18.8                          | 0 (6)                                 |
| ... on television                                                                 | 5.0                            | 5.4                                        | 12.0                                       | 20.5                                      | 15.4                                         | 22.4                                         | 19.3        | 42.9                          | 6 (14)                                |
| ... on billboards                                                                 | 3.0                            | 3.1                                        | 7.4                                        | 14.3                                      | 17.2                                         | 30.2                                         | 24.8        | 27.9                          | 2 (6)                                 |
| ... on radio                                                                      | 1.1                            | 1.0                                        | 2.3                                        | 5.1                                       | 7.1                                          | 54.7                                         | 28.8        | 9.4                           | 0 (0)                                 |
| ... on YouTube, Tumblr, Facebook, Snapchat, Instagram or other social media       | 2.9                            | 2.3                                        | 8.1                                        | 14.0                                      | 15.6                                         | 32.1                                         | 25.0        | 27.3                          | 2 (6)                                 |
| Famous people in films, music videos, on TV or pictured in magazines with alcohol | 4.9                            | 5.3                                        | 10.8                                       | 17.6                                      | 14.4                                         | 23.2                                         | 23.6        | 38.7                          | 6 (14)                                |
| Sport sponsorship                                                                 | 2.4                            | 3.4                                        | 7.9                                        | 17.0                                      | 17.4                                         | 27.8                                         | 24.1        | 30.7                          | 2 (6)                                 |
| Special offers                                                                    | 5.3                            | 5.3                                        | 12.3                                       | 18.8                                      | 14.1                                         | 21.3                                         | 22.8        | 41.7                          | 6 (14)                                |
| Competitions                                                                      | 1.4                            | 1.2                                        | 2.8                                        | 8.2                                       | 11.9                                         | 45.6                                         | 29.0        | 13.6                          | 0 (2)                                 |

Notes:

<sup>1</sup> Score for estimating the approximate number of days on which noticed alcohol marketing in a one month period.<sup>2</sup> Median number of alcohol marketing instances noticed in a one month period.

Base: All respondents (n=3,399): weighted.

**Running head: Alcohol marketing and consumption in young people in the UK****Table 2.** Classification of alcohol marketing awareness (low, medium, and high) by demographic and confounding variables

| Variable                   | Valid n<br>(n= 1,411) <sup>1</sup> |   | Low<br>awareness <sup>2</sup> | Medium<br>awareness <sup>3</sup> | High<br>awareness <sup>4</sup> | $\chi^2$ | p      |
|----------------------------|------------------------------------|---|-------------------------------|----------------------------------|--------------------------------|----------|--------|
| <b>Gender</b>              |                                    |   |                               |                                  |                                | 9.26     | <0.01  |
| Male                       | 735                                | % | 32.1                          | 30.5                             | 37.4                           |          |        |
| Female                     | 676                                | % | 37.3                          | 32.8                             | 29.9                           |          |        |
| <b>Ethnicity</b>           |                                    |   |                               |                                  |                                | 1.09     | n.s.   |
| White British              | 1,082                              | % | 34.5                          | 32.3                             | 33.3                           |          |        |
| Other ethnicity            | 317                                | % | 35.0                          | 29.3                             | 35.6                           |          |        |
| <b>IMD Quintile</b>        |                                    |   |                               |                                  |                                | 10.56    | n.s.   |
| 1 (most deprived)          | 247                                | % | 34.4                          | 26.3                             | 39.3                           |          |        |
| 2                          | 266                                | % | 35.7                          | 28.2                             | 36.1                           |          |        |
| 3                          | 288                                | % | 36.8                          | 31.9                             | 31.2                           |          |        |
| 4                          | 292                                | % | 32.2                          | 34.6                             | 33.2                           |          |        |
| 5 (least deprived)         | 317                                | % | 34.1                          | 35.3                             | 30.6                           |          |        |
| <b>Country lived in</b>    |                                    |   |                               |                                  |                                | 6.89     | n.s.   |
| England                    | 1,230                              | % | 34.5                          | 32.0                             | 33.6                           |          |        |
| Scotland                   | 93                                 | % | 34.4                          | 33.3                             | 32.3                           |          |        |
| Wales                      | 53                                 | % | 39.6                          | 30.2                             | 30.2                           |          |        |
| Northern Ireland           | 34                                 | % | 29.4                          | 17.6                             | 52.9                           |          |        |
| <b>Legal purchase age</b>  |                                    |   |                               |                                  |                                | 14.10    | <0.01  |
| No                         | 995                                | % | 37.6                          | 30.7                             | 31.8                           |          |        |
| Yes                        | 416                                | % | 27.4                          | 33.7                             | 38.9                           |          |        |
| <b>Current drinker</b>     |                                    |   |                               |                                  |                                | 114.04   | <0.001 |
| No                         | 609                                | % | 49.9                          | 26.9                             | 23.2                           |          |        |
| Yes                        | 784                                | % | 23.1                          | 34.8                             | 42.1                           |          |        |
| <b>Higher risk drinker</b> |                                    |   |                               |                                  |                                | 85.84    | <0.001 |
| No                         | 1,027                              | % | 41.7                          | 29.1                             | 29.2                           |          |        |
| Yes                        | 384                                | % | 15.6                          | 38.3                             | 46.1                           |          |        |
| <b>Education</b>           |                                    |   |                               |                                  |                                | 13.90    | <0.001 |
| Not in education           | 79                                 | % | 17.7                          | 31.6                             | 50.6                           |          |        |
| In education               | 1,330                              | % | 35.6                          | 31.7                             | 32.8                           |          |        |
| <b>Working status</b>      |                                    |   |                               |                                  |                                | 7.93     | <0.05  |
| Not in work                | 1,282                              | % | 35.6                          | 31.6                             | 32.8                           |          |        |
| In work                    | 127                                | % | 24.4                          | 32.3                             | 43.3                           |          |        |
| <b>Parents accept use</b>  |                                    |   |                               |                                  |                                | 63.06    | <0.001 |
| No                         | 722                                | % | 44.2                          | 28.4                             | 27.4                           |          |        |
| Yes                        | 689                                | % | 24.4                          | 35.0                             | 40.6                           |          |        |
| <b>Peer accept use</b>     |                                    |   |                               |                                  |                                | 73.08    | <0.001 |
| No                         | 410                                | % | 51.5                          | 24.4                             | 24.1                           |          |        |
| Yes                        | 1001                               | % | 27.7                          | 34.6                             | 37.8                           |          |        |

Notes:

<sup>1</sup>Valid sample excludes those who had reported 'not sure' to any marketing channels); sample is weighted.<sup>2</sup> Low awareness equals  $\leq 16$  instances per month (i.e. once every other day);<sup>3</sup> Medium awareness equals 17-53 instances per month (i.e. almost once a day or more);<sup>4</sup> High awareness equals  $\geq 54$  instances per month (i.e. almost twice a day or more); $\chi^2$  = Bivariate Pearson Chi Square.

Due to a large number of categories, analysis of how awareness of alcohol marketing varied by mother (female carer), father (male carer), and close friend frequency consumption only reported in text.

**Running head:** Alcohol marketing and consumption in young people in the UK**Table 3.** Ownership of alcohol branded items by demographic and confounding variables

| Variable                   | <i>Valid n</i><br>( <i>n</i> = 3,276) <sup>1</sup> |   | Own branded<br>merchandise | $\chi^2$ | <i>p</i> |
|----------------------------|----------------------------------------------------|---|----------------------------|----------|----------|
| <b>Gender</b>              |                                                    |   |                            | 2.71     | n.s.     |
| Male                       | 1,679                                              | % | 18.5                       |          |          |
| Female                     | 1,597                                              | % | 16.3                       |          |          |
| <b>Ethnicity</b>           |                                                    |   |                            | 16.68    | <0.001   |
| White British              | 2,506                                              | % | 19.0                       |          |          |
| Other ethnicity            | 745                                                | % | 12.5                       |          |          |
| <b>IMD Quintile</b>        |                                                    |   |                            | 15.73    | <0.01    |
| 1 (Most deprived)          | 652                                                | % | 13.5                       |          |          |
| 2                          | 646                                                | % | 21.1                       |          |          |
| 3                          | 644                                                | % | 17.2                       |          |          |
| 4                          | 662                                                | % | 19.5                       |          |          |
| 5 (Least deprived)         | 655                                                | % | 16.0                       |          |          |
| <b>Country lived in</b>    |                                                    |   |                            | 0.97     | n.s.     |
| England                    | 2,759                                              | % | 17.4                       |          |          |
| Scotland                   | 260                                                | % | 16.2                       |          |          |
| Wales                      | 155                                                | % | 16.8                       |          |          |
| Northern Ireland           | 103                                                | % | 20.4                       |          |          |
| <b>Legal purchase age</b>  |                                                    |   |                            | 100.33   | <0.001   |
| No                         | 2,488                                              | % | 13.7                       |          |          |
| Yes                        | 788                                                | % | 29.2                       |          |          |
| <b>Current drinker</b>     |                                                    |   |                            | 256.07   | <0.001   |
| No                         | 1,683                                              | % | 7.2                        |          |          |
| Yes                        | 1,549                                              | % | 28.7                       |          |          |
| <b>Higher risk drinker</b> |                                                    |   |                            | 222.98   | <0.001   |
| No                         | 2,543                                              | % | 12.3                       |          |          |
| Yes                        | 690                                                | % | 36.7                       |          |          |
| <b>Education</b>           |                                                    |   |                            | 43.73    | <0.001   |
| Not in education           | 161                                                | % | 36.6                       |          |          |
| In education               | 3,106                                              | % | 16.4                       |          |          |
| <b>Working status</b>      |                                                    |   |                            | 31.08    | <0.001   |
| Not in work                | 3,028                                              | % | 16.3                       |          |          |
| In work                    | 239                                                | % | 30.5                       |          |          |
| <b>Parents accept use</b>  |                                                    |   |                            | 189.06   | <0.001   |
| No                         | 1,920                                              | % | 9.7                        |          |          |
| Yes                        | 1,357                                              | % | 28.2                       |          |          |
| <b>Peer accept use</b>     |                                                    |   |                            | 97.68    | <0.001   |
| No                         | 1,066                                              | % | 8.0                        |          |          |
| Yes                        | 2,210                                              | % | 21.9                       |          |          |

Notes:

<sup>1</sup>Valid sample refers to those who answered 'yes' or 'no'. Missing cases due to 'don't know' response (*n* = 123). Sample is weighted. $\chi^2$  = Bivariate Pearson Chi Square.

Due to a large number of categories, analysis of how ownership of alcohol branded merchandise varied by mother (female carer), father (male carer), and close friend frequency consumption only reported in text.

**Running head:** Alcohol marketing and consumption in young people in the UK

1  
2  
3  
4  
5  
6  
7  
8  
9  
10  
11  
12  
13  
14  
15  
16  
17  
18  
19  
20  
21  
22  
23  
24  
25  
26  
27  
28  
29  
30  
31  
32  
33  
34  
35  
36  
37  
38  
39  
40  
41  
42  
43  
44  
45  
46  
47  
48  
49  
50  
51  
52  
53  
54  
55  
56  
57  
58  
59  
60

For peer review only

**Running head:** Alcohol marketing and consumption in young people in the UK**Table 4.** Association between alcohol marketing awareness and AUDIT-C scoring in current drinkers

| Variables and reference categories                            | Unstandardized coefficients |              |              |      | Standard coefficient |          |          |
|---------------------------------------------------------------|-----------------------------|--------------|--------------|------|----------------------|----------|----------|
|                                                               | <i>b</i>                    | 95% CI Lower | 95% CI Upper | SE   | $\beta$              | <i>t</i> | <i>p</i> |
| <b>Constant</b>                                               | -5.57                       | -7.05        | -4.09        | 0.75 |                      | -7.40    | <0.001   |
| <b>Age</b>                                                    | 0.43                        | 0.35         | 0.51         | 0.04 | 0.30                 | 10.70    | <0.001   |
| <b>Gender</b>                                                 |                             |              |              |      |                      |          |          |
| Male ( <i>vs. female</i> )                                    | 0.31                        | 0.09         | 0.54         | 0.11 | 0.06                 | 2.76     | <0.01    |
| <b>Ethnicity</b>                                              |                             |              |              |      |                      |          |          |
| White British ( <i>vs. other</i> )                            | 0.08                        | -0.24        | 0.40         | 0.16 | 0.01                 | 0.52     | n.s.     |
| <b>IMD Quintile</b>                                           |                             |              |              |      |                      |          |          |
| (1 : most deprived to 5: most affluent)                       | 0.11                        | 0.03         | 0.20         | 0.04 | 0.06                 | 2.68     | <0.01    |
| <b>Country</b>                                                |                             |              |              |      |                      |          |          |
| Scotland ( <i>vs. England</i> )                               | -0.05                       | -0.40        | 0.31         | 0.18 | -0.01                | -0.26    | n.s.     |
| Wales & Northern Ireland ( <i>vs. England</i> )               | -0.37                       | -0.76        | 0.01         | 0.20 | -0.04                | -1.90    | n.s.     |
| <b>Educational status</b>                                     |                             |              |              |      |                      |          |          |
| In education ( <i>vs. not</i> )                               | 0.66                        | 0.22         | 1.10         | 0.22 | 0.07                 | 2.96     | <0.01    |
| <b>Working status</b>                                         |                             |              |              |      |                      |          |          |
| Working ( <i>vs. not</i> )                                    | 0.31                        | -0.06        | 0.67         | 0.19 | 0.04                 | 1.66     | n.s.     |
| <b>Living status</b>                                          |                             |              |              |      |                      |          |          |
| Living independently ( <i>vs. with parents/adult family</i> ) | 0.87                        | 0.54         | 1.20         | 0.17 | 0.12                 | 5.17     | <0.001   |
| Not stated ( <i>vs. with parents/adult family</i> )           | 0.42                        | -0.66        | 1.49         | 0.55 | 0.02                 | 0.76     | n.s.     |
| <b>Frequency of mother drinking</b>                           |                             |              |              |      |                      |          |          |
| Never ( <i>vs. at least monthly</i> )                         | 0.04                        | -0.41        | 0.49         | 0.23 | 0.00                 | 0.17     | n.s.     |
| Less than monthly ( <i>vs. at least monthly</i> )             | -0.31                       | -0.63        | 0.00         | 0.16 | -0.04                | -1.94    | n.s.     |
| Not stated ( <i>vs. at least monthly</i> )                    | 0.42                        | -0.20        | 1.03         | 0.31 | 0.03                 | 1.33     | n.s.     |
| <b>Frequency of father drinking</b>                           |                             |              |              |      |                      |          |          |
| Never ( <i>vs. at least monthly</i> )                         | 0.21                        | -0.33        | 0.75         | 0.27 | 0.02                 | 0.77     | n.s.     |
| Less than monthly ( <i>vs. at least monthly</i> )             | 0.32                        | -0.08        | 0.72         | 0.20 | 0.03                 | 1.57     | n.s.     |
| Not stated ( <i>vs. at least monthly</i> )                    | 0.33                        | -0.04        | 0.71         | 0.19 | 0.04                 | 1.76     | n.s.     |
| <b>Frequency of close friends drinking</b>                    |                             |              |              |      |                      |          |          |
| At least weekly ( <i>vs. less often or never</i> )            | 1.44                        | 1.19         | 1.69         | 0.13 | 0.26                 | 11.32    | <0.001   |
| Not stated ( <i>vs. less than weekly or never</i> )           | -0.49                       | -0.85        | -0.12        | 0.19 | -0.06                | -2.61    | <0.01    |
| <b>Parents' views</b>                                         |                             |              |              |      |                      |          |          |
| Drinking acceptable ( <i>vs. neutral/unacceptable</i> )       | 0.29                        | 0.01         | 0.57         | 0.14 | 0.05                 | 2.06     | <0.05    |
| <b>Peer views</b>                                             |                             |              |              |      |                      |          |          |

**Running head:** Alcohol marketing and consumption in young people in the UK

|                                                |       |       |       |      |       |       |        |
|------------------------------------------------|-------|-------|-------|------|-------|-------|--------|
| Drinking acceptable (vs. neutral/unacceptable) | 0.08  | -0.32 | 0.48  | 0.21 | 0.01  | 0.38  | n.s.   |
| <b>Age of first drink</b>                      |       |       |       |      |       |       |        |
| Age 13 or under (vs. 14 to 15 years)           | 0.22  | -0.07 | 0.51  | 0.15 | 0.04  | 1.50  | n.s.   |
| Age 16 or over (vs. 14 to 15 years)            | -1.33 | -1.63 | -1.04 | 0.15 | -0.21 | -8.82 | <0.001 |
| Not stated (vs. 14 to 15 years)                | -0.48 | -0.89 | -0.07 | 0.21 | -0.05 | -2.28 | <0.05  |
| <b>Alcohol Marketing Awareness</b>             |       |       |       |      |       |       |        |
| Medium (vs. low awareness)                     | 0.79  | 0.37  | 1.21  | 0.21 | 0.11  | 3.70  | <0.001 |
| High (vs. low awareness)                       | 0.85  | 0.44  | 1.26  | 0.21 | 0.12  | 4.08  | <0.001 |
| Not stated (vs. low awareness)                 | 0.40  | 0.04  | 0.76  | 0.18 | 0.07  | 2.20  | <0.05  |
| <b>Own alcohol branded merchandise</b>         |       |       |       |      |       |       |        |
| Yes (vs. no/not sure)                          | 0.79  | 0.55  | 1.04  | 0.13 | 0.13  | 6.30  | <0.001 |

## Notes:

Based on current drinkers:  $n = 1,592$ ; data are unweighted.

DV = AUDIT-C Scoring (0-12)

Model shown is final block. Total variance explained (Adj.  $R^2 = 0.36$ ). Durbin Watson = 2.01.

Final step model change:  $F(4, 1,564) = 17.44, p < 0.001$ .

Overall Final model ANOVA:  $F(27, 1,564) = 34.33, p < 0.001$ .



**Running head:** Alcohol marketing and consumption in young people in the UK**Table 5.** Logistic regression of association between alcohol marketing and higher risk consumption among current drinkers

|                                       | <b>Higher risk consumption among current drinkers</b> |                  |        |        |          |
|---------------------------------------|-------------------------------------------------------|------------------|--------|--------|----------|
|                                       | <i>n</i>                                              | AOR <sup>1</sup> | 95% CI | 95% CI | <i>p</i> |
|                                       |                                                       |                  | Lower  | Upper  |          |
| <b>Age</b>                            | 1,131                                                 | 1.40             | 1.28   | 1.53   | <0.001   |
| <b>Gender</b>                         |                                                       |                  |        |        |          |
| Female                                | 824                                                   | Ref              |        |        |          |
| Male                                  | 768                                                   | 1.32             | 1.04   | 1.68   | <0.05    |
| <b>Ethnicity</b>                      |                                                       |                  |        |        |          |
| Other                                 | 228                                                   | Ref              |        |        |          |
| White British                         | 1,364                                                 | 0.97             | 0.69   | 1.37   | n.s.     |
| <b>IMD Quintile</b>                   |                                                       |                  |        |        | n.s.     |
| 1 (most deprived)                     | 232                                                   | Ref              |        |        |          |
| 2 vs. 1                               | 334                                                   | 1.65             | 1.08   | 2.52   | <0.05    |
| 3 vs. 1,2                             | 324                                                   | 1.26             | 0.90   | 1.76   | n.s.     |
| 4 vs. 1,2,3                           | 340                                                   | 1.21             | 0.90   | 1.64   | n.s.     |
| 5 (most affluent) vs. 1,2,3,4         | 362                                                   | 1.23             | 0.93   | 1.64   | n.s.     |
| <b>Country</b>                        |                                                       |                  |        |        | n.s.     |
| England                               | 1,243                                                 | Ref              |        |        |          |
| Scotland                              | 197                                                   | 0.88             | 0.60   | 1.28   | n.s.     |
| Wales                                 | 116                                                   | 0.58             | 0.36   | 0.93   | <0.05    |
| Northern Ireland                      | 36                                                    | 1.35             | 0.60   | 3.01   | n.s.     |
| <b>Educational status</b>             |                                                       |                  |        |        |          |
| Not in education                      | 146                                                   | Ref              |        |        |          |
| In education                          | 1,446                                                 | 1.61             | 1.01   | 2.55   | <0.05    |
| <b>Working status</b>                 |                                                       |                  |        |        |          |
| Not working                           | 1,374                                                 | Ref              |        |        |          |
| Working (full or part-time)           | 218                                                   | 1.43             | 0.97   | 2.09   | n.s.     |
| <b>Living status</b>                  |                                                       |                  |        |        |          |
| Living with parents/adult family      | 1,307                                                 | Ref              |        |        |          |
| Living independently                  | 268                                                   | 1.56             | 1.09   | 2.23   | <0.05    |
| Not stated                            | 17                                                    | 1.58             | 0.54   | 4.60   | n.s.     |
| <b>Frequency of mother drinking</b>   |                                                       |                  |        |        | <0.05    |
| Never                                 | 115                                                   | ref              |        |        |          |
| Less than monthly vs. never           | 284                                                   | 0.47             | 0.27   | 0.79   | <0.01    |
| Monthly or fortnightly vs. less often | 279                                                   | 1.22             | 0.83   | 1.79   | n.s.     |
| At least weekly vs. less often        | 849                                                   | .93              | .70    | 1.24   | n.s.     |
| Not stated vs. all other categories   | 65                                                    | 1.50             | .78    | 2.88   | n.s.     |
| <b>Frequency of father drinking</b>   |                                                       |                  |        |        | n.s.     |
| Never                                 | 76                                                    | ref              |        |        |          |
| Less than monthly vs. never           | 160                                                   | 1.40             | 0.72   | 2.73   | n.s.     |

**Running head:** Alcohol marketing and consumption in young people in the UK

|                                                                                                                                                   |       |      |      |      |        |
|---------------------------------------------------------------------------------------------------------------------------------------------------|-------|------|------|------|--------|
| Monthly or fortnightly vs. less often                                                                                                             | 201   | 0.73 | 0.46 | 1.19 | n.s.   |
| At least weekly vs. less often                                                                                                                    | 964   | 0.83 | 0.61 | 1.15 | n.s.   |
| Not stated vs. all other categories                                                                                                               | 191   | 1.14 | 0.75 | 1.72 | n.s.   |
| <b>Frequency of close friends drinking</b>                                                                                                        |       |      |      |      | <0.001 |
| Never                                                                                                                                             | 72    | ref  |      |      |        |
| Less than monthly vs. never                                                                                                                       | 187   | 0.68 | 0.32 | 1.42 | n.s.   |
| Monthly or fortnightly vs. less often                                                                                                             | 463   | 2.20 | 1.44 | 3.35 | <0.001 |
| At least weekly vs. less often                                                                                                                    | 667   | 3.41 | 2.48 | 4.70 | <0.001 |
| Not stated vs. all other categories                                                                                                               | 203   | 0.57 | 0.37 | 0.89 | 0.013  |
| <b>Parents' views</b>                                                                                                                             |       |      |      |      |        |
| Neutral or unacceptable                                                                                                                           | 473   | Ref  |      |      |        |
| Drinking acceptable                                                                                                                               | 1,119 | 0.92 | 0.68 | 1.24 | n.s.   |
| <b>Peer views</b>                                                                                                                                 |       |      |      |      |        |
| Neutral or unacceptable                                                                                                                           | 156   | Ref  |      |      |        |
| Drinking acceptable                                                                                                                               | 1,436 | 1.41 | 0.88 | 2.25 | n.s.   |
| <b>Age of first drink</b>                                                                                                                         |       |      |      |      | <0.001 |
| Age 13 or under                                                                                                                                   | 472   | Ref  |      |      |        |
| Age 14 to 15 (vs. 13 or under)                                                                                                                    | 535   | 0.86 | 0.63 | 1.18 | n.s.   |
| Age 16 or over (vs. younger)                                                                                                                      | 412   | 0.26 | 0.19 | 0.35 | <0.001 |
| Not stated                                                                                                                                        | 173   | 0.89 | 0.59 | 1.35 | n.s.   |
| <b>Alcohol Marketing Awareness</b>                                                                                                                |       |      |      |      | <0.001 |
| Low awareness                                                                                                                                     | 184   | Ref  |      |      |        |
| Medium vs. low                                                                                                                                    | 274   | 2.18 | 1.39 | 3.42 | <0.001 |
| High vs. medium and low                                                                                                                           | 326   | 1.43 | 1.01 | 2.02 | <0.01  |
| Not stated vs. all other categories                                                                                                               | 808   | 0.85 | 0.67 | 1.08 | n.s.   |
| <b>Own alcohol branded merchandise</b>                                                                                                            |       |      |      |      |        |
| No or not sure                                                                                                                                    | 1,138 | Ref  |      |      |        |
| Yes                                                                                                                                               | 454   | 1.71 | 1.31 | 2.22 | <0.001 |
| Notes:                                                                                                                                            |       |      |      |      |        |
| Based on current drinkers ( $n = 1,592$ ); data are unweighted.                                                                                   |       |      |      |      |        |
| DV: Higher risk drinking on the AUDIT-C ( $\geq 5$ ), 1 = Higher risk ( $n = 699$ ) and 0 = Lower risk ( $n = 893$ )                              |       |      |      |      |        |
| Test of model coefficients in final block: $\chi^2 (35) = 477.29, p < 0.001$ .                                                                    |       |      |      |      |        |
| Hosmer & Lemeshow for final block $\chi^2 (8) = 11.66, p = 0.17$ .                                                                                |       |      |      |      |        |
| Nagelkerke $R^2$ for final block = 0.35.                                                                                                          |       |      |      |      |        |
| Cases correctly classified in final block: 72% in final block                                                                                     |       |      |      |      |        |
| <sup>1</sup> Adjusted for all other variables in the model, Adj OR, adjusted odds ratio; ref, reference category; 95% CI, 95% confidence interval |       |      |      |      |        |

**Running head:** Alcohol marketing and consumption in young people in the UK**Table 6.** Logistic regression of association between alcohol marketing and never drinkers' susceptibility to drink

|                                       | Susceptibility to drink among never drinkers |                  |                    |                    |          |
|---------------------------------------|----------------------------------------------|------------------|--------------------|--------------------|----------|
|                                       | <i>n</i>                                     | AOR <sup>1</sup> | 95%<br>CI<br>Lower | 95%<br>CI<br>Upper | <i>p</i> |
| <b>Age</b>                            | 1,580                                        | 1.05             | 0.98               | 1.13               | n.s.     |
| <b>Gender</b>                         |                                              |                  |                    |                    |          |
| Female                                | 791                                          | ref              |                    |                    |          |
| Male                                  | 789                                          | 1.09             | 0.88               | 1.37               | n.s.     |
| <b>Ethnicity</b>                      |                                              |                  |                    |                    |          |
| Other                                 | 377                                          | ref              |                    |                    |          |
| White British                         | 1,203                                        | 1.51             | 1.12               | 2.03               | <0.01    |
| <b>IMD Quintile</b>                   |                                              |                  |                    |                    | n.s.     |
| 1 (most deprived)                     | 399                                          | ref              |                    |                    |          |
| 2 vs. 1                               | 278                                          | 1.13             | 0.80               | 1.60               | n.s.     |
| 3 vs. 1,2                             | 355                                          | 1.02             | 0.76               | 1.36               | n.s.     |
| 4 vs. 1,2,3                           | 233                                          | 0.88             | 0.64               | 1.22               | n.s.     |
| 5 (most affluent) vs. 1,2,3,4         | 315                                          | 0.84             | 0.63               | 1.11               | n.s.     |
| <b>Country</b>                        |                                              |                  |                    |                    | n.s.     |
| England                               | 1,193                                        | ref              |                    |                    |          |
| Scotland                              | 191                                          | 1.14             | 0.80               | 1.61               | n.s.     |
| Wales                                 | 115                                          | 1.09             | 0.70               | 1.69               | n.s.     |
| Northern Ireland                      | 81                                           | 0.96             | 0.58               | 1.59               | n.s.     |
| <b>Educational status</b>             |                                              |                  |                    |                    |          |
| Not in education                      | 25                                           | ref              |                    |                    |          |
| In education                          | 1,555                                        | 0.67             | 0.20               | 2.25               | n.s.     |
| <b>Working status</b>                 |                                              |                  |                    |                    |          |
| Not working                           | 1,550                                        | ref              |                    |                    |          |
| Working (full or part-time)           | 30                                           | 2.59             | 0.83               | 8.11               | n.s.     |
| <b>Living status</b>                  |                                              |                  |                    |                    | n.s.     |
| Living with parents/adult family      | 1,545                                        | ref              |                    |                    |          |
| Living independently                  | 28                                           | 0.51             | 0.20               | 1.28               | n.s.     |
| Not stated                            | 7                                            | 1.57             | 0.27               | 9.11               | n.s.     |
| <b>Frequency of mother drinking</b>   |                                              |                  |                    |                    | <0.001   |
| Never                                 | 321                                          | ref              |                    |                    | <0.001   |
| Less than monthly vs. never           | 382                                          | 2.38             | 1.58               | 3.59               | <0.001   |
| Monthly or fortnightly vs. less often | 242                                          | 1.66             | 1.15               | 2.39               | <0.01    |
| At least weekly vs. less often        | 560                                          | 1.47             | 1.11               | 1.94               | <0.01    |
| Not stated vs. all other categories   | 75                                           | 1.25             | 0.70               | 2.25               | n.s.     |
| <b>Frequency of father drinking</b>   |                                              |                  |                    |                    | <0.05    |
| Never                                 | 273                                          | ref              |                    |                    |          |
| Less than monthly vs. never           | 217                                          | 1.88             | 1.17               | 3.01               | <0.01    |
| Monthly or fortnightly vs. less often | 232                                          | 1.11             | 0.75               | 1.64               | n.s.     |

**Running head:** Alcohol marketing and consumption in young people in the UK

|                                            |       |      |      |      |        |
|--------------------------------------------|-------|------|------|------|--------|
| At least weekly vs. less often             | 686   | 1.39 | 1.05 | 1.84 | <0.05  |
| Not stated vs. all other categories        | 172   | 1.06 | 0.71 | 1.58 | n.s.   |
| <b>Frequency of close friends drinking</b> |       |      |      |      | <0.001 |
| Never                                      | 922   | ref  |      |      |        |
| Less than monthly vs. never                | 162   | 3.46 | 2.26 | 5.26 | <0.001 |
| Monthly or fortnightly vs. less often      | 80    | 3.32 | 1.66 | 6.65 | <0.001 |
| At least weekly vs. less often             | 83    | 0.70 | 0.39 | 1.26 | n.s.   |
| Not stated vs. all other categories        | 333   | 0.61 | 0.43 | 0.86 | <0.01  |
| <b>Parents' views</b>                      |       |      |      |      |        |
| Neutral or unacceptable                    | 1,364 | ref  |      |      |        |
| Drinking acceptable                        | 216   | 1.00 | 0.70 | 1.44 | n.s.   |
| <b>Peer views</b>                          |       |      |      |      |        |
| Neutral or unacceptable                    | 894   | ref  |      |      |        |
| Drinking acceptable                        | 686   | 2.29 | 1.77 | 2.96 | <0.001 |
| <b>Alcohol Marketing Awareness</b>         |       |      |      |      | n.s.   |
| Low awareness                              | 279   | ref  |      |      |        |
| Medium vs. low                             | 148   | 1.44 | 0.92 | 2.28 | n.s.   |
| High vs. medium and low                    | 117   | 1.16 | 0.71 | 1.90 | n.s.   |
| Not stated vs. all other categories        | 1,036 | 1.21 | 0.94 | 1.56 | n.s.   |
| <b>Own alcohol branded merchandise</b>     |       |      |      |      |        |
| No or not sure                             | 1,476 | ref  |      |      |        |
| Yes                                        | 104   | 1.98 | 1.20 | 3.24 | <0.01  |

**Notes:**

Based on never drinkers ( $n = 1,580$ ) data are unweighted.

DV: Susceptibility: 1 = Susceptible ( $n = 830$ ) = 0; Not susceptible ( $n = 750$ ).

Test of model coefficients in final block:  $\chi^2(32) = 337.46, p < 0.001$ .

Hosmer & Lemeshow for final block  $\chi^2(8) = 5.86, p = 0.663$

Nagelkerke  $R^2$  for final block = 0.26.

Cases correctly classified in final block: 69%

<sup>1</sup> adjusted for all other variables in the model, Adj OR, adjusted odds ratio; ref, reference category; 95% CI, 95% confidence interval

<sup>2</sup> Variable not applicable to those who were classed as 'never drinkers'

**STROBE 2007 (v4) Statement—Checklist of items that should be included in reports of *cross-sectional studies***

| Section/Topic                | Item # | Recommendation                                                                                                                                                                       | Reported on page # |
|------------------------------|--------|--------------------------------------------------------------------------------------------------------------------------------------------------------------------------------------|--------------------|
| <b>Title and abstract</b>    | 1      | (a) Indicate the study's design with a commonly used term in the title or the abstract                                                                                               | 1,2                |
|                              |        | (b) Provide in the abstract an informative and balanced summary of what was done and what was found                                                                                  | 2                  |
| <b>Introduction</b>          |        |                                                                                                                                                                                      |                    |
| Background/rationale         | 2      | Explain the scientific background and rationale for the investigation being reported                                                                                                 | 4,5,6              |
| Objectives                   | 3      | State specific objectives, including any prespecified hypotheses                                                                                                                     | 6                  |
| <b>Methods</b>               |        |                                                                                                                                                                                      |                    |
| Study design                 | 4      | Present key elements of study design early in the paper                                                                                                                              | 6                  |
| Setting                      | 5      | Describe the setting, locations, and relevant dates, including periods of recruitment, exposure, follow-up, and data collection                                                      | 6                  |
| Participants                 | 6      | (a) Give the eligibility criteria, and the sources and methods of selection of participants                                                                                          | 6                  |
| Variables                    | 7      | Clearly define all outcomes, exposures, predictors, potential confounders, and effect modifiers. Give diagnostic criteria, if applicable                                             | 7,8,9,10           |
| Data sources/<br>measurement | 8*     | For each variable of interest, give sources of data and details of methods of assessment (measurement). Describe comparability of assessment methods if there is more than one group | 7,8,9,10           |
| Bias                         | 9      | Describe any efforts to address potential sources of bias                                                                                                                            | 7,8,9,10,11,12     |
| Study size                   | 10     | Explain how the study size was arrived at                                                                                                                                            | N/A                |
| Quantitative variables       | 11     | Explain how quantitative variables were handled in the analyses. If applicable, describe which groupings were chosen and why                                                         | 7,8,9,10,11,12     |
| Statistical methods          | 12     | (a) Describe all statistical methods, including those used to control for confounding                                                                                                | 11,12              |
|                              |        | (b) Describe any methods used to examine subgroups and interactions                                                                                                                  | 11,12              |
|                              |        | (c) Explain how missing data were addressed                                                                                                                                          | 11,12              |
|                              |        | (d) If applicable, describe analytical methods taking account of sampling strategy                                                                                                   | 11,12              |
|                              |        | (e) Describe any sensitivity analyses                                                                                                                                                | 11,12              |
| <b>Results</b>               |        |                                                                                                                                                                                      |                    |

|                          |     |                                                                                                                                                                                                              |                              |
|--------------------------|-----|--------------------------------------------------------------------------------------------------------------------------------------------------------------------------------------------------------------|------------------------------|
| Participants             | 13* | (a) Report numbers of individuals at each stage of study—eg numbers potentially eligible, examined for eligibility, confirmed eligible, included in the study, completing follow-up, and analysed            | 13,14,15,17 (and all tables) |
|                          |     | (b) Give reasons for non-participation at each stage                                                                                                                                                         | 13,14,15,17 (and all tables) |
|                          |     | (c) Consider use of a flow diagram                                                                                                                                                                           | N/A                          |
| Descriptive data         | 14* | (a) Give characteristics of study participants (eg demographic, clinical, social) and information on exposures and potential confounders                                                                     | 12,13                        |
|                          |     | (b) Indicate number of participants with missing data for each variable of interest                                                                                                                          | 13,14,15,17 (and all tables) |
| Outcome data             | 15* | Report numbers of outcome events or summary measures                                                                                                                                                         | 13,14,15,17 (and all tables) |
| Main results             | 16  | (a) Give unadjusted estimates and, if applicable, confounder-adjusted estimates and their precision (eg, 95% confidence interval). Make clear which confounders were adjusted for and why they were included | 13,14,15,17 (and all tables) |
|                          |     | (b) Report category boundaries when continuous variables were categorized                                                                                                                                    | 13,14,15,17 (and all tables) |
|                          |     | (c) If relevant, consider translating estimates of relative risk into absolute risk for a meaningful time period                                                                                             | N/A                          |
| Other analyses           | 17  | Report other analyses done—eg analyses of subgroups and interactions, and sensitivity analyses                                                                                                               | 13,14,15,17 (and all tables) |
| <b>Discussion</b>        |     |                                                                                                                                                                                                              |                              |
| Key results              | 18  | Summarise key results with reference to study objectives                                                                                                                                                     | 17,20                        |
| Limitations              | 19  | Discuss limitations of the study, taking into account sources of potential bias or imprecision. Discuss both direction and magnitude of any potential bias                                                   | 19,20                        |
| Interpretation           | 20  | Give a cautious overall interpretation of results considering objectives, limitations, multiplicity of analyses, results from similar studies, and other relevant evidence                                   | 17,18,19,20                  |
| Generalisability         | 21  | Discuss the generalisability (external validity) of the study results                                                                                                                                        | 17,18,19,20                  |
| <b>Other information</b> |     |                                                                                                                                                                                                              |                              |
| Funding                  | 22  | Give the source of funding and the role of the funders for the present study and, if applicable, for the original study on which the present article is based                                                | 21                           |

\*Give information separately for cases and controls in case-control studies and, if applicable, for exposed and unexposed groups in cohort and cross-sectional studies.

1  
2 **Note:** An Explanation and Elaboration article discusses each checklist item and gives methodological background and published examples of transparent reporting. The STROBE  
3 checklist is best used in conjunction with this article (freely available on the Web sites of PLoS Medicine at <http://www.plosmedicine.org/>, Annals of Internal Medicine at  
4 <http://www.annals.org/>, and Epidemiology at <http://www.epidem.com/>). Information on the STROBE Initiative is available at [www.strobe-statement.org](http://www.strobe-statement.org).  
5  
6  
7  
8  
9  
10  
11  
12  
13  
14  
15  
16  
17  
18  
19  
20  
21  
22  
23  
24  
25  
26  
27  
28  
29  
30  
31  
32  
33  
34  
35  
36  
37  
38  
39  
40  
41  
42  
43  
44  
45  
46

For peer review only
